# Supplementary material for: Rapid access to 3-aminoindazoles from nitriles with hydrazines: a strategy to overcome the basicity barrier imparted by hydrazines
Source: Royal Society of Chemistry journal article supplement (doi:10.1039/d0cc03789c), 2020-01-01

Supporting Information for:

## **Rapid Access to 3-Aminoindazoles from Nitriles with Hydrazines: A Strategy to Overcome the Basicity Barrier Imparted by Hydrazines**

Chunyan Zhang,<sup>\*,a</sup> Haowen Zhao,<sup>a</sup> Zehua Li,<sup>a</sup> Zuyu Liang,<sup>a</sup> Shuo Qi,<sup>a</sup> Mingyu Cai,<sup>a</sup> Sheng Zhang,<sup>a</sup> Xiaofei Jia,<sup>a</sup> Guoying Zhang,<sup>\*,a</sup> and Mao-lin Hu<sup>\*,b</sup>

<sup>a</sup>Key Laboratory of Sensor Analysis of Tumor Marker, Ministry of Education; Shandong Key Laboratory of Biochemical Analysis; Key Laboratory of Analytical Chemistry for Life Science in Universities of Shandong; College of Chemistry and Molecular Engineering, Qingdao University of Science and Technology, Qingdao 266042, P.R. China.

<sup>b</sup>College of Chemistry and Materials Engineering, Wenzhou University, Wenzhou 325035, P.R. China.

\*E-mail: zhanggy@qust.edu.cn; maolin\_hu@yahoo.com

### **CONTENTS**

- 1 General experimental details and materials**
- 2 Optimization of the reaction conditions**
- 3 General procedure for the annulation reaction**
- 4 Experimental characterization data for products**
- 5 Gram scale experiments**
- 6 Mechanistic studies**
- 7 Reference**
- 8 Copies for <sup>1</sup>H NMR and <sup>13</sup>C NMR of the 3-aminoindazoles**

## 1. General experiment details and materials

**Experimental:** All reactions and manipulations with air sensitive compounds being present were performed under dry argon (Ar 5.0) or nitrogen (N<sub>2</sub> 5.0), using Schlenk and glove box techniques. Non-halogenated solvents were dried over sodium benzophenone, 2-methyltetrahydrofuran (2-Me-THF) was dried over calcium hydride, and halogenated solvents were dried over P<sub>2</sub>O<sub>5</sub>. Deuterated solvents were bought from Cambridge Isotope Laboratories, distilled accordingly, and stored over molecular sieves (3 Å). Other chemicals were purchased from commercial vendors and used without further purification. NMR spectra were collected on a Varian INOVA 300 and 400 MHz spectrometer. Chemical shifts ( $\delta$ ) are reported in ppm relative to residual solvent signal. Coupling constants ( $J$ ) are given in Hz (coupling patterns: s: singlet, s\_br: broad singlet, d: doublet, t: triplet, q: quartet, m: multiplet). GC analyses were carried out using an Agilent Technologies 6890N system equipped with a Machinery-Nagel (MN) Optima 5 HT column (30 m, 320  $\mu$ m, 0.25  $\mu$ m) or an Agilent Technologies 6850 system equipped with a MN Optima 17 column (30 m, 320  $\mu$ m, 0.25  $\mu$ m). GC/MS analyses were carried out on an Agilent 7890A/MSD 5975C system equipped with a HP-5MS column (30 m, 320  $\mu$ m, 0.25  $\mu$ m). High resolution mass spectra (HRMS) were recorded on Bruker Micro TOF-QII mass (ESI). MN silica gel 60 (0.040 – 0.063 mm particle size) was used for flash column chromatography.

## 2. Optimization of the reaction conditions

Closed system:

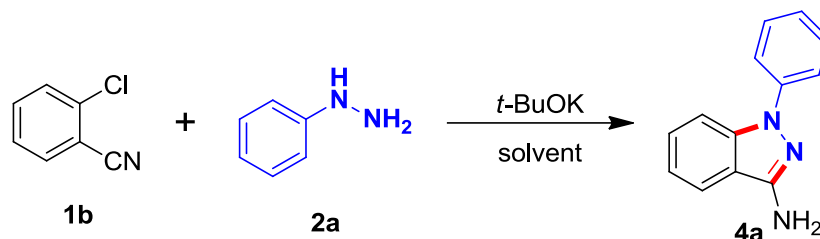

Using a nitrogen-filled glove box, an oven-dried pressure tube (38 mL volume) was charged with a magnetic stirring bar, base, phenyl hydrazine (**2a**) and solvent. After stirring of 5 minutes, 2-chlorobenzonitrile (**1b**) was added to the mixture. Then the seal tube was closed tightly with a teflon cap, removed from the glove box and immersed into a pre-heated oil bath (design temperature). After design time the reaction was cooled, quenched with half-saturated brine and extracted with dichloromethane (4 x 15 mL). The combined organic phase was dried over Na<sub>2</sub>SO<sub>4</sub> and concentrated. A small aliquot of the organic phase was analyzed by GC or GC-MS to monitor product formation. Purification of the remainder by column chromatography on silica gel gave the corresponding products **4a** (pentane/ethyl ether = 15/1 – 5/1) in the reported yield.

| Entry    | Parameter                                      |
|----------|------------------------------------------------|
| Table S1 | Investigated nitriles and hydrazines.          |
| Table S2 | Screening the loading of <i>t</i> -BuOK        |
| Table S3 | The difference of base screening               |
| Table S4 | The difference of solvent screening            |
| Table S5 | The ratio of <b>1b</b> and <b>2a</b> screening |
| Table S6 | Reaction temperature screening                 |
| Table S7 | The reaction time screening                    |
| Table S8 | Reaction system screening                      |

**Table S1. Investigated nitriles and hydrazines. <sup>a</sup>**

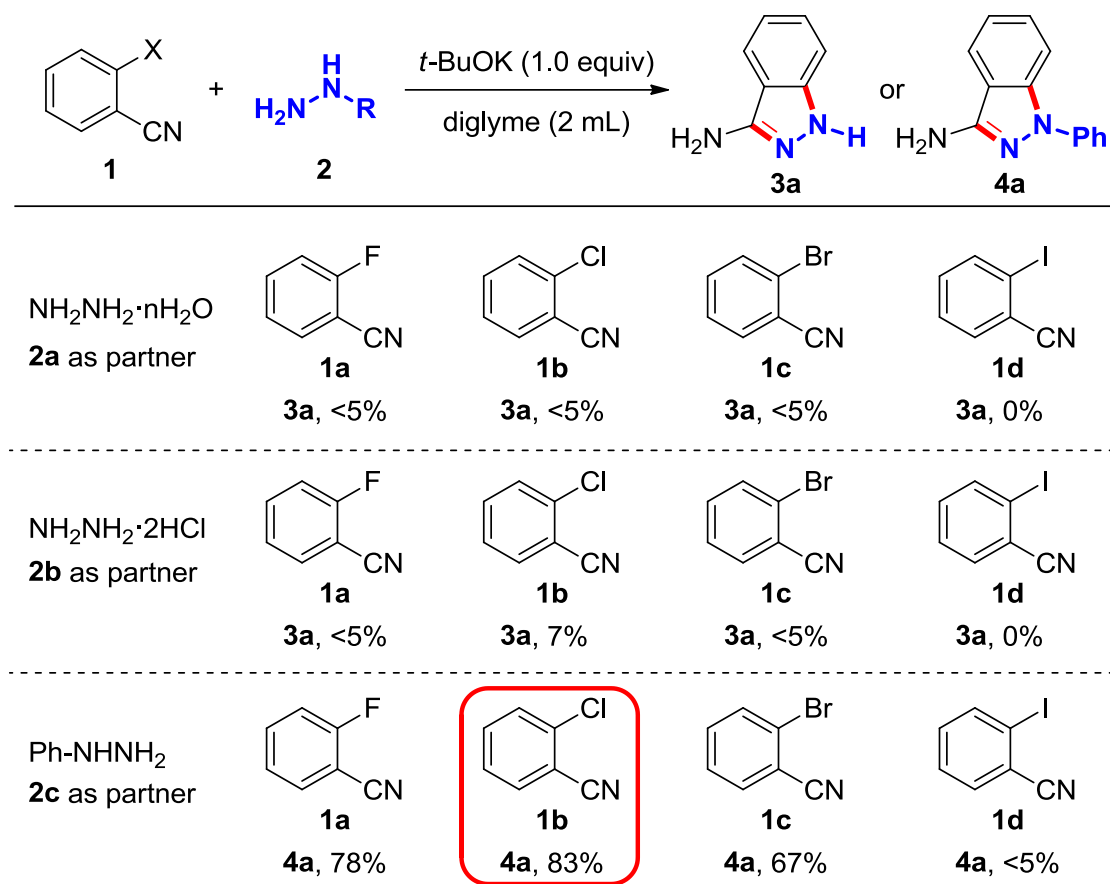

<sup>a</sup> Reaction condition : **1** (1.0 mmol), **2** (3.0 mmol),  $t\text{-BuOK}$  (1.0 mmol), diglyme (2.0 mL),  $\text{N}_2$ , 130 °C (extern temperature), 1 h. Yield of **3a** or **4a** was determined by GC analysis using *n*-dodecane as the internal standard.

**Table S2. Screening the loading of *t*-BuOK<sup>a</sup>**

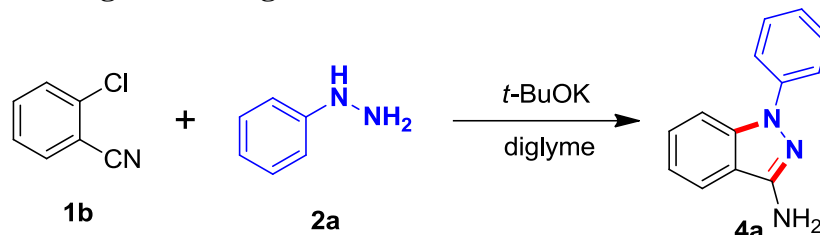

| Entry    | <i>t</i> -BuOK (equiv) | <b>4a</b> (%) |
|----------|------------------------|---------------|
| 1        | 0.1                    | <5            |
| 2        | 0.3                    | 21            |
| 3        | 0.5                    | 32            |
| 4        | 0.7                    | 56            |
| 5        | 0.9                    | 61            |
| 6        | 1.0                    | 70            |
| 7        | 1.1                    | 76            |
| 8        | 1.2                    | 85            |
| <b>9</b> | <b>1.3</b>             | <b>95</b>     |
| 10       | 1.4                    | 94            |
| 11       | 1.5                    | 91            |
| 12       | 1.7                    | 88            |
| 13       | 1.8                    | 83            |
| 14       | 1.9                    | 81            |
| 15       | 2.0                    | 78            |
| 16       | 3.0                    | 52            |

<sup>a</sup> Reaction condition : **1b** (1.0 mmol), **2a** (3.0 mmol), *t*-BuOK (1.3 mmol), diglyme (2.0 mL), N<sub>2</sub>, 130 °C (extern temperature), 1 h. Yield of **4a** were determined by GC analysis using *n*-dodecane as the internal standard.

**Table S3. The difference of base screening <sup>a</sup>**

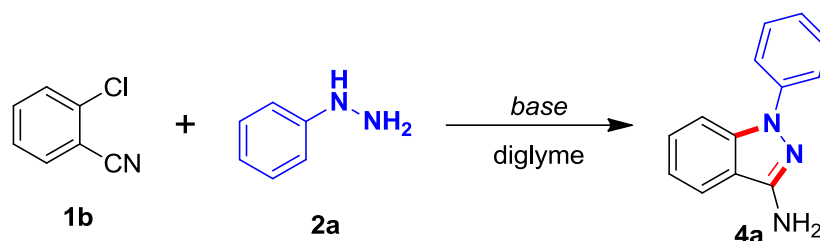

| entry     | base                            | <b>4a</b> (%) |
|-----------|---------------------------------|---------------|
| 1         | Cs <sub>2</sub> CO <sub>3</sub> | 0             |
| 2         | K <sub>2</sub> CO <sub>3</sub>  | 0             |
| 3         | Na <sub>2</sub> CO <sub>3</sub> | 0             |
| 4         | KHCO <sub>3</sub>               | 0             |
| 5         | K <sub>3</sub> PO <sub>4</sub>  | 0             |
| 6         | K <sub>2</sub> HPO <sub>4</sub> | 0             |
| 7         | CsOH                            | <5            |
| 8         | KOH                             | 9             |
| 9         | NaOH                            | <5            |
| 10        | LiOH                            | 0             |
| <b>11</b> | <b><i>t</i>-BuOK</b>            | <b>95</b>     |
| 12        | <i>t</i> -BuONa                 | 60            |
| 13        | <i>t</i> -BuOLi                 | 0             |
| 14        | KHMDS                           | 68            |
| 15        | NaHMDS                          | 10            |
| 16        | LiHMDS                          | 0             |
| 17        | DBU                             | 0             |
| 18        | Et <sub>3</sub> N               | 0             |
| 19        | LEDA                            | 0             |
| 20        | <i>n</i> -BuLi                  | 0             |
| 21        | -                               | 0             |

<sup>a</sup> Reaction condition : **1b** (1.0 mmol), **2a** (3.0 mmol), base (1.3 mmol), diglyme (2.0 mL), N<sub>2</sub>, 130 °C (extern temperature), 1 h. Yield of **4a** were determined by GC analysis using *n*-dodecane as the internal standard.

**Table S4. The difference of solvent screening <sup>a</sup>**

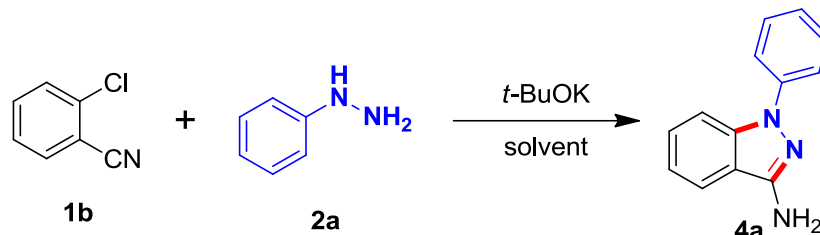

| Entry | solvent                                              | <b>4a</b> (%) |
|-------|------------------------------------------------------|---------------|
| 1     | <b>diglyme</b>                                       | <b>95</b>     |
| 2     | 1,4-dioxane                                          | 87            |
| 3     | 1,2-Dimethoxyethane                                  | 80            |
| 4     | Anisole                                              | 77            |
| 5     | THF                                                  | 82            |
| 6     | 4-MeTHF                                              | 78            |
| 7     | benzene                                              | 73            |
| 8     | xylene                                               | 81            |
| 9     | Toluene                                              | 85            |
| 10    | DMSO                                                 | 74            |
| 11    | DMF                                                  | 52            |
| 12    | DMAc                                                 | 53            |
| 13    | MeOH                                                 | 0             |
| 14    | EtOH                                                 | 0             |
| 15    | <i>i</i> -PrOH                                       | 0             |
| 16    | <i>t</i> -BuOH                                       | <5            |
| 17    | <i>t</i> -AmOH                                       | 38            |
| 18    | CH <sub>3</sub> CN                                   | 0             |
| 19    | CH <sub>3</sub> NO <sub>2</sub>                      | 0             |
| 20    | CH <sub>3</sub> C(O)OCH <sub>2</sub> CH <sub>3</sub> | <5            |

<sup>a</sup> Reaction condition : **1b** (1.0 mmol), **2a** (3.0 mmol), *t*-BuOK (1.3 mmol), solvent (2.0 mL), N<sub>2</sub>, 130 °C (extern temperature), 1 h. Yield of **4a** were determined by GC analysis using *n*-dodecane as the internal standard.

**Table S5. The ratio of 1a and 1b screening<sup>a</sup>**

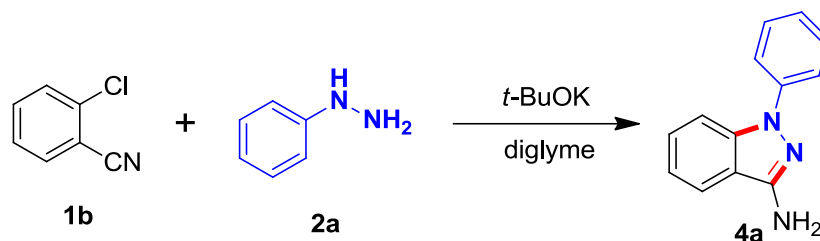

| Entry     | <b>1b</b> | <b>2a</b> | <b>4a</b> (%) |
|-----------|-----------|-----------|---------------|
| 1         | 2.0       | 1         | 24            |
| 2         | 1.8       | 1         | 49            |
| 3         | 1.6       | 1         | 50            |
| 4         | 1.4       | 1         | 54            |
| 5         | 1.2       | 1         | 67            |
| 6         | 1         | 1         | 70            |
| 7         | 1         | 1.1       | 73            |
| 8         | 1         | 1.2       | 78            |
| 9         | 1         | 1.3       | 82            |
| 10        | 1         | 1.4       | 84            |
| 11        | 1         | 1.5       | 84            |
| 12        | 1         | 2         | 87            |
| <b>13</b> | <b>1</b>  | <b>3</b>  | <b>95</b>     |
| 14        | 1         | 4         | 94            |
| 15        | 1         | 5         | 92            |

<sup>a</sup> Reaction condition : **1b** (x mmol), **2a** (x mmol), *t*-BuOK (1.3 mmol), diglyme (2.0 mL), N<sub>2</sub>, 130 °C (extern temperature), 1 h. Yield of **4a** were determined by GC analysis using *n*-dodecane as the internal standard.



**Table S6. The reaction temperature screening<sup>a</sup>**

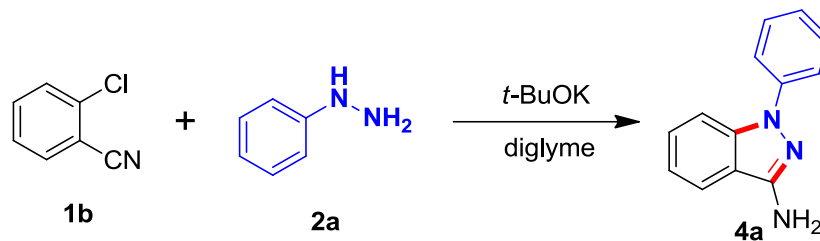

| Entry    | T/°C       | <b>4a</b> (%) |
|----------|------------|---------------|
| 1        | 20         | <5            |
| 2        | 40         | 43            |
| 3        | 60         | 64            |
| 4        | 80         | 72            |
| 5        | 100        | 78            |
| 6        | 120        | 89            |
| <b>7</b> | <b>130</b> | <b>95</b>     |
| 8        | 140        | 94            |

<sup>a</sup> Reaction condition : **1b** (1.0 mmol), **2a** (3.0 mmol), *t*-BuOK (1.3 mmol), diglyme (2.0 mL), N<sub>2</sub>, T (extern temperature), 1 h. Yield of **4a** were determined by GC analysis using *n*-dodecane as the internal standard.

**Table S8. The reaction time screening<sup>a</sup>**

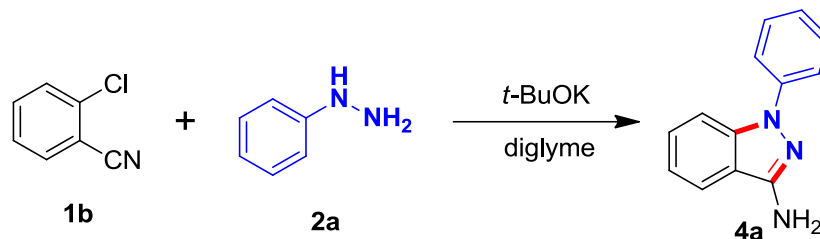

| Entry    | t/min     | <b>4a</b> (%) |
|----------|-----------|---------------|
| 1        | 10        | 39            |
| 2        | 20        | 61            |
| 3        | 30        | 75            |
| 4        | 40        | 83            |
| 5        | 50        | 90            |
| <b>6</b> | <b>60</b> | <b>95</b>     |
| 7        | 120       | 94            |
| 8        | 180       | 96            |

<sup>a</sup> Reaction condition : **1b** (1.0 mmol), **2a** (3.0 mmol), *t*-BuOK (1.3 mmol), diglyme (2.0 mL), N<sub>2</sub>, 130 °C (extern temperature), t. Yield of **4a** were determined by GC analysis using *n*-dodecane as the internal standard.

**Table S8: Reaction system screening<sup>a</sup>**

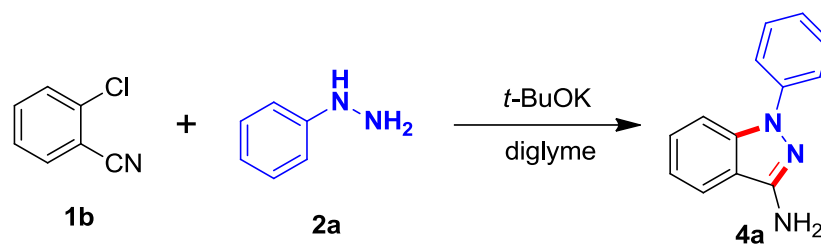

| Entry | System      |                | <b>4a</b> (%) |
|-------|-------------|----------------|---------------|
| 1     | Seal tube   | N <sub>2</sub> | 95            |
| 2     | Seal tube   | Ar             | 96            |
| 3     | Seal tube   | air            | 73            |
| 4     | Seal tube   | O <sub>2</sub> | <5            |
| 5     | Open-reflux | N <sub>2</sub> | 90            |
| 6     | Open-reflux | Ar             | 91            |
| 7     | Open-reflux | air            | 62            |
| 8     | Open-reflux | O <sub>2</sub> | <5            |

<sup>a</sup> Reaction condition : **1b** (1.0 mmol), **2a** (3.0 mmol), *t*-BuOK (1.3 mmol), diglyme (2.0 mL), 130 °C (extern temperature), 1 h. Yield of **4a** were determined by GC analysis using *n*-dodecane as the internal standard.

### 3. General procedure for the annulation reaction

Closed system:

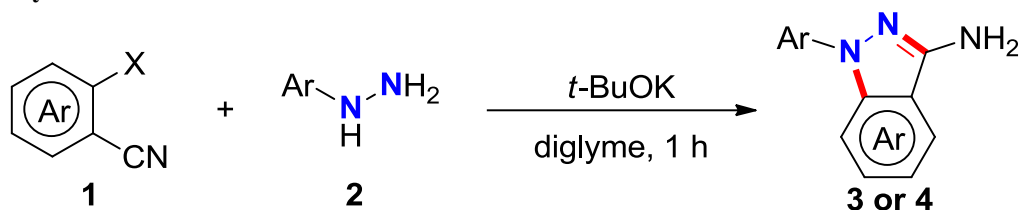

Using a nitrogen-filled glove box, an oven-dried pressure tube (38 mL volume) was charged with a magnetic stirring bar, base, hydrazines (**2**) and diglyme. After stirring of five minutes, nitriles (**1**) was added the mixture reaction. Then the seal tube was closed tightly with a teflon cap, removed from the glove box and immersed into a pre-heated oil bath (design temperature). After design time the reaction was cooled, quenched with half-saturated brine and extracted with dichloromethane (4 x 15 mL). The combined organic phase was dried over Na<sub>2</sub>SO<sub>4</sub> and concentrated. A small aliquot of the organic phase was analyzed by GC or GC-MS to monitor product formation. Purification of the remainder by column chromatography on silica gel gave the corresponding products **3a** or **4a** (pentane/ethyl ether = 15/1 – 5/1) in the reported yield.

#### 4. Experimental characterization data for products

**1-phenyl-1H-indazol-3-amine (4a):** Then the corresponding reaction mixture was

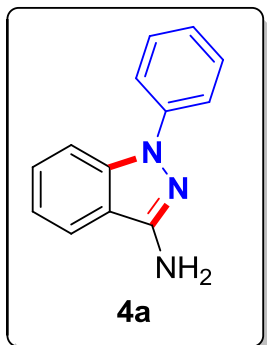

purified by flash column chromatography on a silica gel column petroleum ether/ethyl acetate (6/1, v/v) to give the desired product as a white solid (198 mg, 95%). **<sup>1</sup>H NMR** (500 MHz, CDCl<sub>3</sub>) δ 7.71 – 7.64 (m, 3H), 7.61 (d, *J* = 8.0 Hz, 1H), 7.48 (m, 2H), 7.41 (m, *J* = 7.5 Hz, 1H), 7.24 (m, 1H), 7.13 (m, 1H), 4.22 (s, 2H); **<sup>13</sup>C NMR** (101 MHz, CDCl<sub>3</sub>) δ 149.1, 140.4, 139.5, 129.2, 127.7, 124.9, 121.2, 119.7, 119.6, 116.5, 110.1. **HRMS** (ESI) calcd. for C<sub>13</sub>H<sub>12</sub>N<sub>3</sub> [M+H]: 209.0953, found: 209.0958.

**1-(m-tolyl)-1H-indazol-3-amine (4b):** Then the corresponding reaction mixture was purified by flash column chromatography on a silica gel column petroleum ether/ethyl

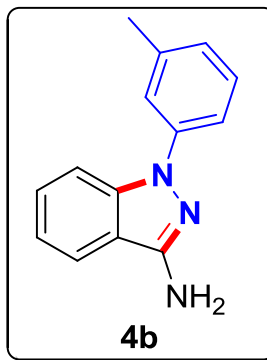

acetate (6/1, v/v) to give the desired product as a white solid (205 mg, 92%). **<sup>1</sup>H NMR** (500 MHz, CDCl<sub>3</sub>) δ 7.67 (d, *J* = 8.5 Hz, 1H), 7.60 (d, *J* = 8.0 Hz, 1H), 7.49 (s, 1H), 7.46 (d, *J* = 8.0 Hz, 1H), 7.43 – 7.38 (m, 1H), 7.36 (m, 1H), 7.12 (m, 1H), 7.07 (d, *J* = 7.5 Hz, 1H), 3.39 (s, 2H), 2.43 (s, 3H); **<sup>13</sup>C NMR** (101 MHz, CDCl<sub>3</sub>) δ 149.0, 140.1, 139.2, 138.9, 128.7, 127.4, 125.4, 121.6, 119.6, 119.4, 117.9, 116.3, 109.9, 21.1. **HRMS** (ESI)

calcd. for C<sub>14</sub>H<sub>14</sub>N<sub>3</sub> [M+H]: 223.1188, found: 223.1189.

**1-(3-fluorophenyl)-1H-indazol-3-amine(4c):** Then the corresponding reaction mixture

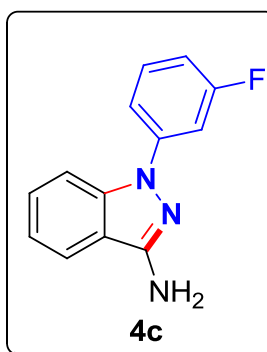

was purified by flash column chromatography on a silica gel column petroleum ether/ethyl acetate (6/1, v/v) to give the desired product as a white solid (211 mg, 93%). **<sup>1</sup>H NMR** (500 MHz, CDCl<sub>3</sub>) δ 7.70 (d, *J* = 8.5 Hz, 1H), 7.62 (d, *J* = 8.0 Hz, 1H), 7.47 (m, *J* = 13.5, 8.0 Hz, 2H), 7.42 (m, 2H), 7.17 (m, 1H), 6.93 (m, 1H), 3.05 (s, 2H); **<sup>13</sup>C NMR** (101 MHz, CDCl<sub>3</sub>) δ 164.3, 161.9, 149.5, 142.0, 142.0, 139.49, 130.0, 130.0, 128.1, 120.2,

119.8, 117.0, 116.0, 116.0, 111.4, 111.2, 110.2, 108.3, 108.0. **<sup>19</sup>F NMR** (377 MHz, CDCl<sub>3</sub>) δ -111.28 (s); **HRMS** (ESI) calcd. for C<sub>13</sub>H<sub>11</sub>FN<sub>3</sub>[M+H]: 228.0937, found: 228.0940.

**1-(2-fluorophenyl)-1H-indazol-3-amine (4d):** Then the corresponding reaction

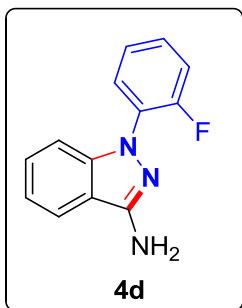

mixture was purified by flash column chromatography on a silica gel column petroleum ether/ethyl acetate (8/1, v/v) to give the desired product as a white solid (140 mg, 62%). **<sup>1</sup>H NMR** (500 MHz, CDCl<sub>3</sub>) δ 7.59 (m, 2H), 7.42 – 7.36 (m, 1H), 7.34 – 7.28 (m, 2H), 7.25 (m, 2H), 7.13 (m, 1H), 4.02 (s, 2H); **<sup>13</sup>C NMR** (101 MHz, CDCl<sub>3</sub>) δ 156.7, 154.2, 149.8, 141.1, 127.7 (dd, *J* = 14.8, 9.7 Hz), 127.0 (d, *J* = 1.1 Hz), 124.6 (d, *J* = 3.7 Hz), 119.7, 119.4, 116.6 (d, *J* = 19.8 Hz), 116.1, 110.36 (d, *J* = 5.9 Hz); **<sup>19</sup>F NMR** (377 MHz, CDCl<sub>3</sub>) δ -120.35 (s). **HRMS** (ESI) calcd. for C<sub>13</sub>H<sub>11</sub>FN<sub>3</sub>[M+H]: 228.0937, found: 228.0939.

**1-(3-chlorophenyl)-1H-indazol-3-amine (4e):** Then the corresponding reaction

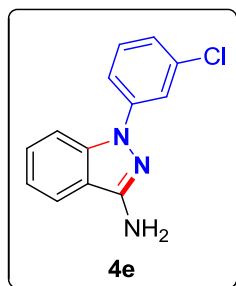

mixture was purified by flash column chromatography on a silica gel column petroleum ether/ethyl acetate (6/1, v/v) to give the desired product as a white solid (221 mg, 91%). **<sup>1</sup>H NMR** (500 MHz, CDCl<sub>3</sub>) δ 7.69 (m, 2H), 7.62 (d, *J* = 8.0 Hz, 1H), 7.58 (d, *J* = 8.0 Hz, 1H), 7.45 (m, 1H), 7.40 (m, 1H), 7.22 – 7.13 (m, 2H), 2.68 (s, 2H); **<sup>13</sup>C NMR** (101 MHz, CDCl<sub>3</sub>) δ 149.5, 141.6, 139.4, 134.8, 130.2, 128.1, 124.6, 121.0, 120.3, 119.8, 118.7, 117.0, 110.2. **HRMS** (ESI) calcd. for C<sub>13</sub>H<sub>11</sub>ClN<sub>3</sub>[M+H]: 243.0563, found: 243.0564.

**1-(2-chlorophenyl)-1H-indazol-3-amine (4f):** Then the corresponding reaction mixture

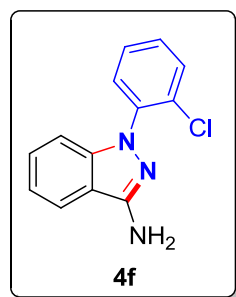

was purified by flash column chromatography on a silica gel column petroleum ether/ethyl acetate (5/1, v/v) to give the desired product as a white solid (133 mg, 55%). **<sup>1</sup>H NMR** (500 MHz, CDCl<sub>3</sub>) δ 7.62 (d, *J* = 8.0 Hz, 1H), 7.56 (dd, *J* = 7.5, 1.5 Hz, 1H), 7.48 (dd, *J* = 7.5, 1.5 Hz, 1H), 7.39 – 7.32 (m, 3H), 7.13 (m, 2H), 4.25 (s, 2H); **<sup>13</sup>C NMR** (101 MHz, CDCl<sub>3</sub>) δ 149.5, 141.2, 137.1, 130.3, 128.9, 128.4, 127.2,

119.4, 115.6, 110.2. **HRMS** (ESI) calcd. for  $C_{13}H_{11}ClN_3$   $[M+H]^+$ : 243.0563, found: 243.0560.

**1-(3,5-dichlorophenyl)-1H-indazol-3-amine (4g)**: Then the corresponding reaction

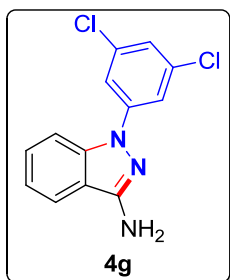

mixture was purified by flash column chromatography on a silica gel column petroleum ether/ethyl acetate (8/1, v/v) to give the desired product as a white solid (250 mg, 90%).  **$^1H$  NMR** (500 MHz,  $CDCl_3$ )  $\delta$  7.69 (d,  $J = 8.5$  Hz, 1H), 7.62 (m, 3H), 7.51 – 7.47 (m, 1H), 7.23 – 7.18 (m, 2H), 2.14 – 2.05 (m, 2H).;  **$^{13}C$  NMR** (101 MHz, DMSO)  $\delta$  152.3, 143.1, 139.2, 135.3, 129.2, 122.8, 121.8, 121.1, 118.9, 117.6,

111.1. **HRMS** (ESI) calcd. for  $C_{13}H_{10}Cl_2N_3$   $[M+H]^+$ : 278.0252, found: 278.0257.

**1-(2,5-dichlorophenyl)-1H-indazol-3-amine (4h)**: Then the corresponding reaction

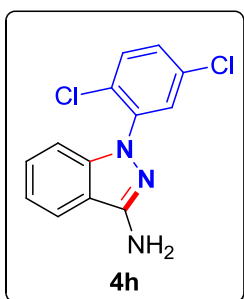

mixture was purified by flash column chromatography on a silica gel column petroleum ether/ethyl acetate (8/1, v/v) to give the desired product as a white solid (141 mg, 51%).  **$^1H$  NMR** (500 MHz,  $CDCl_3$ )  $\delta$  7.60 (d,  $J = 8.5$  Hz, 1H), 7.48 (m, 2H), 7.39 (m, 1H), 7.30 (dd,  $J = 8.5, 2.5$  Hz, 1H), 7.18 – 7.09 (m, 2H), 4.34 (s, 2H).;  **$^{13}C$  NMR** (126 MHz,  $CDCl_3$ )  $\delta$  149.9, 141.5, 138.5, 133.0, 131.4, 129.1, 128.8,

128.6, 127.7, 120.1, 119.5, 116.2, 110.7; **HRMS** (ESI) calcd. for  $C_{13}H_{10}Cl_2N_3$   $[M+H]^+$ : 278.0252, found: 278.0258.

**1-(3-bromophenyl)-1H-indazol-3-amine (4i)**: Then the corresponding reaction mixture

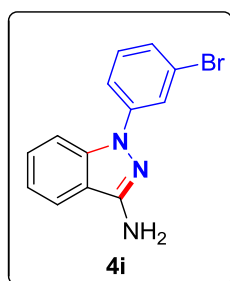

was purified by flash column chromatography on a silica gel column petroleum ether/ethyl acetate (8/1, v/v) to give the desired product as a white solid (253 mg, 88%).  **$^1H$  NMR** (500 MHz,  $CDCl_3$ )  $\delta$  7.86 (s, 1H), 7.68 (d,  $J = 8.5$  Hz, 1H), 7.62 (m, 2H), 7.44 (m, 1H), 7.37 – 7.30 (m, 2H), 7.16 (m,  $J = 7.5$  Hz, 1H), 3.79 (s, 2H).;  **$^{13}C$  NMR** (126 MHz,  $CDCl_3$ )  $\delta$  149.5, 141.7, 139.5, 130.5, 128.2, 127.6, 124.0,

122.9, 120.4, 119.8, 119.2, 117.0, 110.2; **HRMS** (ESI) calcd. for  $C_{13}H_{11}BrN_3$   $[M+H]^+$ : 288.0136, found: 288.0140.

**1-(naphthalen-1-yl)-1H-indazol-3-amine (4j):** Then the corresponding reaction mixture

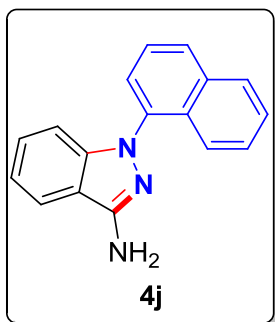

was purified by flash column chromatography on a silica gel column petroleum ether/ethyl acetate (6/1, v/v) to give the desired product (150 mg, 58%). **<sup>1</sup>H NMR** (500 MHz, CDCl<sub>3</sub>) δ 7.93 (dd, *J* = 14.5, 8.0 Hz, 2H), 7.83 (d, *J* = 8.5 Hz, 1H), 7.67 (d, *J* = 8.0 Hz, 1H), 7.56 (m, 3H), 7.46 (m, 1H), 7.34 – 7.29 (m, 1H), 7.17 – 7.11 (m, 2H), 4.28 (s, 2H).; **<sup>13</sup>C NMR** (101 MHz, CDCl<sub>3</sub>) δ 149.0, 142.3, 136.1, 134.6, 129.8, 128.07 (d, *J* = 2.6 Hz), 127.4, 126.6, 126.4, 125.3, 123.9 (d, *J* = 10.3 Hz), 119.5 (d, *J* = 4.3 Hz), 115.6, 110.2; **HRMS** (ESI) calcd. for C<sub>17</sub>H<sub>14</sub>N<sub>3</sub> [M+H]: 260.1188, found: 260.1191.

**1-(pyridin-2-yl)-1H-indazol-3-amine (4k):** Then the corresponding reaction mixture

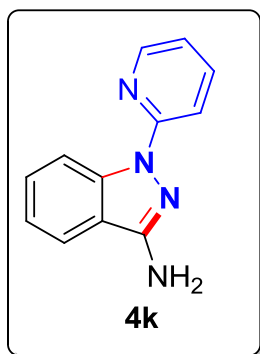

was purified by flash column chromatography on a silica gel column petroleum ether/ethyl acetate (5/1, v/v) to give the desired product as a white solid (183 mg, 87%). **<sup>1</sup>H NMR** (500 MHz, CDCl<sub>3</sub>) δ 8.77 (d, *J* = 8.5 Hz, 1H), 8.44 (d, *J* = 4.0 Hz, 1H), 7.80 (d, *J* = 8.5 Hz, 1H), 7.76 – 7.69 (m, 1H), 7.57 (d, *J* = 8.0 Hz, 1H), 7.50 (m, 1H), 7.20 (m, 1H), 7.00 (dd, *J* = 6.5, 5.5 Hz, 1H), 4.32 (s, 2H).; **<sup>13</sup>C NMR** (101 MHz, CDCl<sub>3</sub>) δ 154.2, 149.8, 147.5, 139.8, 137.8, 128.5, 121.1, 118.8, 118.0, 117.6, 115.3, 111.9; **HRMS** (ESI) calcd. for C<sub>12</sub>H<sub>10</sub>N<sub>4</sub> [M+H]:211.0984, found: 211.0988.

**1-(benzo[d]thiazol-2-yl)-1H-indazol-3-amine (4l):** Then the corresponding reaction

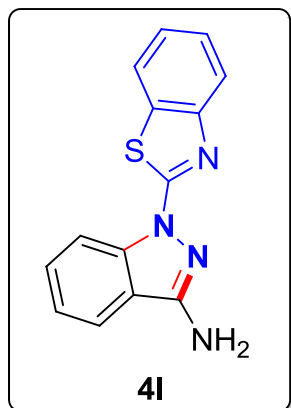

mixture was purified by flash column chromatography on a silica gel column petroleum ether/ethyl acetate (8/1, v/v) to give the desired product as a white solid (186 mg, 70%). **<sup>1</sup>H NMR** (500 MHz, DMSO) δ 8.67 (d, *J* = 8.5 Hz, 1H), 8.11 (m, 2H), 7.96 (d, *J* = 8.0 Hz, 1H), 7.81 (m, 1H), 7.60 (m, *J* = 7.5 Hz, 1H), 7.49 (m, *J* = 7.5 Hz, 1H), 7.43 (m, 1H), 6.83 (s, 2H).; **<sup>13</sup>C NMR** (126 MHz, DMSO) δ 160.9, 153.7, 152.4, 139.2, 131.7, 130.2,



126.8, 123.6, 123.2, 122.2, 121.8, 121.1, 120.1, 114.1.; **HRMS** (ESI) calcd. for  $C_{14}H_{11}N_4S[M+H]$ : 267.0704, found: 267.0710.

**5-methyl-1-phenyl-1H-indazol-3-amine(5b):** Then the corresponding reaction

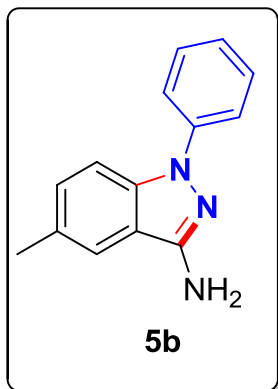

mixture was purified by flash column chromatography on a silica gel column petroleum ether/ethyl acetate (5/1, v/v) to give the desired product as a white solid (209 mg, 94%).  **$^1H$  NMR** (500 MHz,  $CDCl_3$ )  $\delta$  7.65 (d,  $J = 8.0$  Hz, 2H), 7.57 (d,  $J = 8.5$  Hz, 1H), 7.46 (m, 2H), 7.37 (s, 1H), 7.25 – 7.19 (m, 2H), 3.91 (s, 2H), 2.46 (s, 3H).;  **$^{13}C$  NMR** (101 MHz,  $CDCl_3$ )  $\delta$  148.6, 140.6, 138.2, 129.6, 129.20 (d,  $J = 12.5$  Hz), 124.5, 120.8, 118.8, 116.8, 109.9, 20.99. **HRMS** (ESI) calcd. for  $C_{14}H_{14}N_3 [M+H]$ : 223.1188,

found: 223.1186.

**4-methyl-1-phenyl-1H-indazol-3-amine (5c):** Then the corresponding reaction mixture

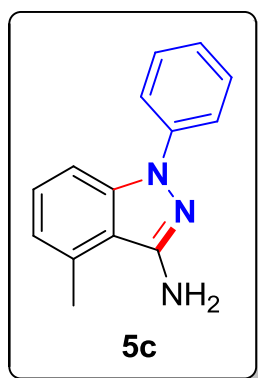

was purified by flash column chromatography on a silica gel column petroleum ether/ethyl acetate (5/1, v/v) to give the desired product as a white solid (205 mg, 92%).  **$^1H$  NMR** (500 MHz,  $CDCl_3$ )  $\delta$  7.64 (d,  $J = 8.0$  Hz, 2H), 7.47 (m, 3H), 7.23 (m, 2H), 6.82 (d,  $J = 7.0$  Hz, 1H), 3.93 (s, 2H), 2.72 (s, 3H).;  **$^{13}C$  NMR** (101 MHz,  $CDCl_3$ )  $\delta$  149.8, 140.3 (d,  $J = 19.6$  Hz), 132.0, 129.2, 127.9, 125.0, 121.6, 120.9, 115.9, 107.9, 19.1; **HRMS** (ESI) calcd. for  $C_{13}H_{13}N_3 [M+H]$ : 224.1188, found: 224.1190.

**6-methoxy-1-phenyl-1H-indazol-3-amine (5d):** Then the corresponding reaction

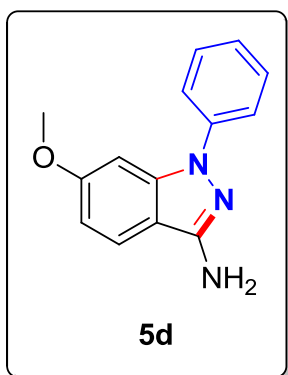

mixture was purified by flash column chromatography on a silica gel column petroleum ether/ethyl acetate (6/1, v/v) to give the desired product as a white solid (172 mg, 72%).  **$^1H$  NMR** (500 MHz,  $CDCl_3$ )  $\delta$  7.63 (d,  $J = 8.0$  Hz, 2H), 7.55 – 7.41 (m, 3H), 7.28 – 7.23 (m, 1H), 7.02 (m, 1H), 6.77 (dd,  $J = 9.0, 2.0$  Hz, 1H), 4.02 (s, 2H), 3.85 (s, 3H).;  **$^{13}C$  NMR** (101 MHz, DMSO)  $\delta$

160.7, 151.3, 141.3, 140.6, 129.9, 124.4, 122.4, 120.6, 112.2, 110.7, 92.6, 55.8; **HRMS** (ESI) calcd. For  $C_{14}H_{14}N_3O$  [M+H]: 240.1137, found: 240.1142.

**4-fluoro-1-phenyl-1H-indazol-3-amine (5e):** Then the corresponding reaction mixture

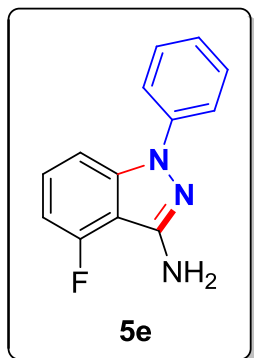

was purified by flash column chromatography on a silica gel column petroleum ether/ethyl acetate (6/1, v/v) to give the desired product as a white solid (127 mg, 56%).  **$^1H$  NMR** (500 MHz,  $CDCl_3$ )  $\delta$  7.62 (d,  $J = 8.0$  Hz, 2H), 7.53 – 7.43 (m, 3H), 7.26 (m, 2H), 7.02 (d,  $J = 7.5$  Hz, 1H), 4.68 (s, 2H).;  **$^{13}C$  NMR** (101 MHz,  $CDCl_3$ )  $\delta$  148.8, 141.0, 140.0, 129.4, 128.5, 127.0, 125.8, 122.0, 121.7, 120.1, 113.7, 109.0;  **$^{19}F$  NMR** (377 MHz,  $CDCl_3$ )  $\delta$  -61.63

(s). **HRMS** (ESI) calcd. For  $C_{13}H_{11}FN_3$  [M+H]: 228.0937, found: 228.0944.

**5-chloro-1-phenyl-1H-indazol-3-amine(5f):** Then the corresponding reaction mixture

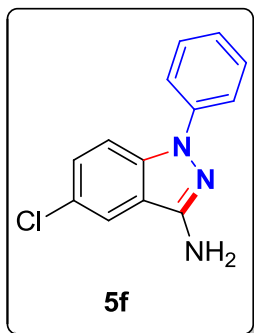

was purified by flash column chromatography on a silica gel column petroleum ether/ethyl acetate (5/1, v/v) to give the desired product as a white solid (207 mg, 85%).  **$^1H$  NMR** (500 MHz,  $CDCl_3$ )  $\delta$  7.60 (d,  $J = 8.0$  Hz, 2H), 7.55 (m, 2H), 7.47 (m, 2H), 7.31 (dd,  $J = 9.0, 2.0$  Hz, 1H), 7.24 (m, 1H), 4.26 (s, 2H).  **$^{13}C$  NMR** (126 MHz,  $CDCl_3$ )  $\delta$  148.26 (s), 140.06 (s), 138.08 (s), 129.37 (s), 128.21 (s), 125.46 (s), 125.14 (s), 121.41 (s), 119.04 (s),

117.37 (s), 111.34 (s), 77.25 (s), 76.87 (d,  $J = 32.0$  Hz), 76.65 – 76.41 (m). **HRMS** (ESI) calcd. for  $C_{13}H_{11}ClN_3$  [M+H]: 244.0642, found: 244.0645.

**5-bromo-1-phenyl-1H-indazol-3-amine (5g):** Then the corresponding reaction

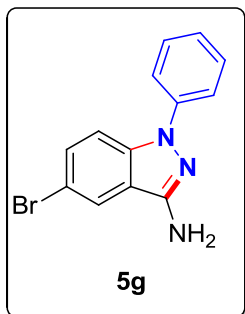

mixture was purified by flash column chromatography on a silica gel column petroleum ether/ethyl acetate (8/1, v/v) to give the desired product as a white solid (216 mg, 75%).  **$^1H$  NMR** (500 MHz,  $CDCl_3$ )  $\delta$  7.75 (d,  $J = 1.5$  Hz, 1H), 7.61 (d,  $J = 8.0$  Hz, 2H), 7.53 (d,  $J = 9.0$  Hz, 1H), 7.50 – 7.45 (m, 3H), 7.28 (d,  $J = 8.0$  Hz, 1H), 3.54 (s, 2H).;  **$^{13}C$  NMR** (101 MHz, DMSO)  $\delta$  150.6, 140.7, 138.0, 130.8,

129.9, 124.9, 124.1, 120.6, 119.3, 112.5, 111.4.; **HRMS** (ESI) calcd. for C<sub>13</sub>H<sub>11</sub>BrN<sub>3</sub> [M+H]: 288.0136, found: 288.0143.

**5-iodo-1-phenyl-1H-indazol-3-amine (5h):** Then the corresponding reaction mixture

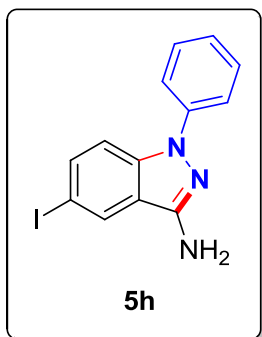

was purified by flash column chromatography on a silica gel column petroleum ether/ethyl acetate (8/1, v/v) to give the desired product as a white solid (17.8 mg, 53%). **<sup>1</sup>H NMR** (500 MHz, DMSO) δ 8.43 (s, 1H), 7.82 – 7.69 (m, 4H), 7.64 (m, 2H), 7.37 (m, 1H), 6.16 (s, 2H).; **<sup>13</sup>C NMR** (101 MHz, DMSO) δ 150.2, 140.7, 138.2, 136.0, 130.2, 129.9, 124.9, 120.6, 120.1, 112.8, 82.3; **HRMS** (ESI) calcd. for C<sub>13</sub>H<sub>11</sub>IN<sub>3</sub> [M+H]: 335.9998, found:

336.0000.

**1-phenyl-1H-indazole-3,6-diamine (5i):** Then the corresponding reaction mixture was

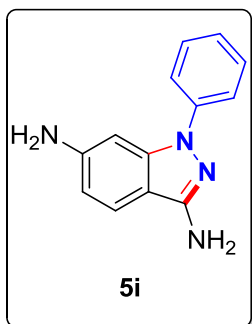

purified by flash column chromatography on a silica gel column petroleum ether/ethyl acetate (8/1, v/v) to give the desired product as a white solid (213 mg, 95%). **<sup>1</sup>H NMR** (500 MHz, CDCl<sub>3</sub>) δ 7.60 (d, *J* = 8.0 Hz, 2H), 7.43 (t, *J* = 7.5 Hz, 2H), 7.35 (d, *J* = 8.5 Hz, 1H), 7.18 (t, *J* = 7.5 Hz, 1H), 6.85 (s, 1H), 6.51 (d, *J* = 8.5 Hz, 1H), 4.11 (s, 4H).; **<sup>13</sup>C NMR** (101 MHz, CDCl<sub>3</sub>) δ 149.2, 147.3, 141.1, 140.6, 128.9, 124.1, 120.7, 120.5, 110.7, 109.8, 93.0;

**HRMS** (ESI) calcd. for C<sub>13</sub>H<sub>13</sub>N<sub>4</sub> [M+H]: 225.1140, found: 225.1143.

**1-phenyl-5-(trifluoromethyl)-1H-indazol-3-amine (5j):** Then the corresponding

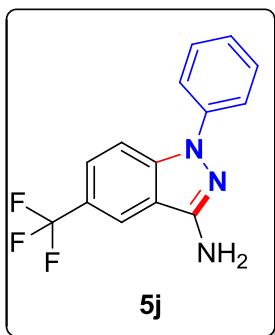

reaction mixture was purified by flash column chromatography on a silica gel column petroleum ether/ethyl acetate (5/1, v/v) to give the desired product as a white solid (247 mg, 89%). **<sup>1</sup>H NMR** (500 MHz, CDCl<sub>3</sub>) δ 7.90 (s, 1H), 7.69 (d, *J* = 9.0 Hz, 1H), 7.64 (d, *J* = 8.0 Hz, 2H), 7.58 (d, *J* = 9.0 Hz, 1H), 7.50 (m, 2H), 7.30 (m, 1H), 4.28 (s, 2H).; **<sup>13</sup>C NMR** (101 MHz, CDCl<sub>3</sub>) δ 149.7, 140.4, 139.7, 129.4, 125.9, 124.3 (d, *J* = 3.2 Hz), 121.8 (d,

$J = 10.2$  Hz), 118.0 (d,  $J = 4.4$  Hz), 115.8, 110.6;  $^{19}\text{F}$  NMR (377 MHz,  $\text{CDCl}_3$ )  $\delta$  -60.76 (s); HRMS (ESI) calcd. for  $\text{C}_{14}\text{H}_{11}\text{F}_3\text{N}_3$  [M+H]: 278.0905, found: 278.0910.

**1-phenyl-6-(trifluoromethyl)-1H-indazol-3-amine (5k):** Then the corresponding

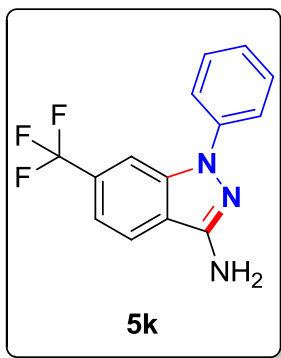

reaction mixture was purified by flash column chromatography on a silica gel column petroleum ether/ethyl acetate (5/1, v/v) to give the desired product as a white solid (180 mg, 65%).  $^1\text{H}$

NMR (500 MHz,  $\text{CDCl}_3$ )  $\delta$  7.91 (s, 1H), 7.71 (d,  $J = 8.5$  Hz, 1H), 7.64 (d,  $J = 8.0$  Hz, 2H), 7.52 (m, 2H), 7.33 (m, 2H), 4.30 (s, 2H).;  $^{13}\text{C}$  NMR (101 MHz,  $\text{CDCl}_3$ )  $\delta$  148.9, 139.7, 138.6,

129.5, 126.0, 121.8, 120.7, 118.1, 116.3 (d,  $J = 3.3$  Hz), 107.8 (q,

$J = 4.6$  Hz);  $^{19}\text{F}$  NMR (377 MHz,  $\text{CDCl}_3$ )  $\delta$  -61.63 (s).; HRMS (ESI) calcd. for  $\text{C}_{14}\text{H}_{11}\text{F}_3\text{N}_3$  [M+H]: 278.0905, found: 278.0909.

## 5. Gram scale experiments

### Open system:

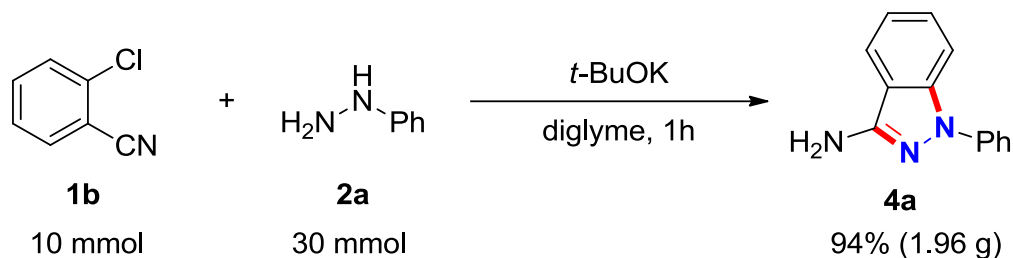

### 10 mmol scale:

Using a nitrogen-filled glove box, an oven-dried Schleck tube (250 mL volume) was charged with a magnetic stirring bar, *t*-BuOK (13 mmol, 1.46 g), phenyl hydrazine (30 mmol, 3.244 g) and diglyme (40 mL). After stirring of 5 minutes, 2-chlorobenzonitrile (10 mmol, 1.376 g) was added the mixture reaction, the tube was sealed, taken out of the glove box and a reflux condenser was attached under argon stream. The mixture was heated to a gentle reflux for an hours under inert atmosphere in an open system at 130 °C (oil bath). After cooling, quenched with half-saturated brine and extracted with dichloromethane (4 x 200 mL). The combined organic phase was dried over Na<sub>2</sub>SO<sub>4</sub> and concentrated. A small aliquot of the organic phase was analyzed by GC and GC-MS to monitor product formation. Then the corresponding reaction mixture was purified by flash column chromatography on a silica gel column (pentane/ethyl ether = 5/1) to give the desired products **4a** in 94 % yield (1.96 g).

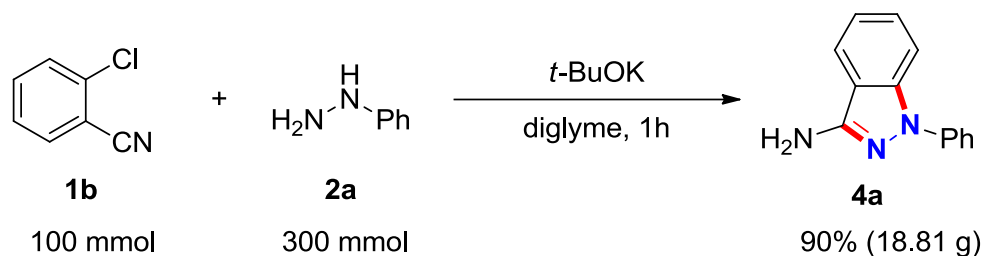

**100 mmol scale:**

Using a nitrogen-filled glove box, an oven-dried Schleck tube (2.5 L volume) was charged with a magnetic stirring bar, *t*-BuOK (0.13 mmol, 14.6 g), phenyl hydrazine (0.3 mol, 32.44 g) and diglyme (0.5 L). After stirring of 5 minutes, 2-chlorobenzonitrile (0.1 mol, 13.76 g) was added the mixture reaction, the tube was sealed, taken out of the glove box and a reflux condenser was attached under argon stream. The mixture was heated to a gentle reflux for an hours under inert atmosphere in an open system at 130 °C (oil bath). After cooling, quenched with half-saturated brine and extracted with dichloromethane (4 x 200 mL). The combined organic phase was dried over Na<sub>2</sub>SO<sub>4</sub> and concentrated. A small aliquot of the organic phase was analyzed by GC and GC-MS to monitor product formation. Then the corresponding reaction mixture was purified by recrystallized to give the desired product (diethyl ether/DCM) to give the desired products **4a** in 90 % yield (18.81 g).

## 6. Mechanistic investigations

### 6.1 Control experiments

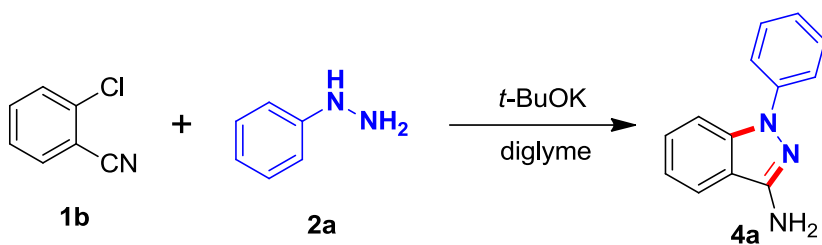

| Entry | Reaction condition                     | <b>4a</b> (%) |
|-------|----------------------------------------|---------------|
| 1     | 98% <i>t</i> -BuOK<br>new seal tube    | 95            |
| 2     | 99.99% <i>t</i> -BuOK<br>new seal tube | 96            |
| 3     | --<br>new seal tube                    | 0             |

Using a nitrogen-filled glove box, an oven-dried pressure tube (38 mL volume) was charged with a magnetic stirring bar, *t*-BuOK (1.3 mmol), phenyl hydrazine (3.0 mmol) and diglyme (2.0 mL). After stirring of 5 minutes, 2-chlorobenzonitrile (1.0 mmol) was added the mixture reaction. Then the seal tube was closed tightly with a teflon cap, removed from the glove box and immersed into a pre-heated oil bath (design temperature). After design time the reaction was cooled, quenched with half-saturated brine and extracted with dichloromethane (4 x 15 mL). The combined organic phase was dried over Na<sub>2</sub>SO<sub>4</sub> and concentrated. A small aliquot of the organic phase was analyzed by GC to monitor product formation.

## 6.2 Control experiments with transition metal additives

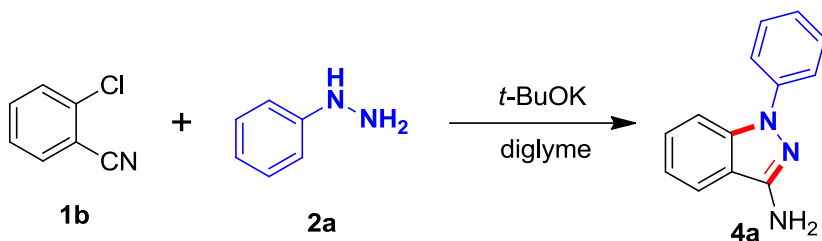

| Entry | Reaction condition     | Additive                      | <b>4a</b> (%) |
|-------|------------------------|-------------------------------|---------------|
| 1     | 99.99% $t\text{-BuOK}$ | CuBr (5 mol%)                 | 92            |
| 2     | 99.99% $t\text{-BuOK}$ | Pd(OAc) <sub>2</sub> (5 mol%) | 93            |
| 3     | --                     | CuBr (5 mol%)                 | <5            |
| 4     | --                     | Pd(OAc) <sub>2</sub> (5 mol%) | <5            |

Using a nitrogen-filled glove box, an oven-dried pressure tube (38 mL volume) was charged with a magnetic stirring bar,  $t\text{-BuOK}$  (1.3 mmol), phenyl hydrazine (3.0 mmol), additives (0.05 mmol) and diglyme (2.0 mL). After stirring of 5 minutes, 2-chlorobenzonitrile (1.0 mmol) was added the mixture reaction. Then the seal tube was closed tightly with a teflon cap, removed from the glove box and immersed into a pre-heated oil bath (design temperature). After design time the reaction was cooled, quenched with half-saturated brine and extracted with dichloromethane (4 x 15 mL). The combined organic phase was dried over  $\text{Na}_2\text{SO}_4$  and concentrated. A small aliquot of the organic phase was analyzed by GC to monitor product formation.



### 6.3 Control experiments with radical scavenger

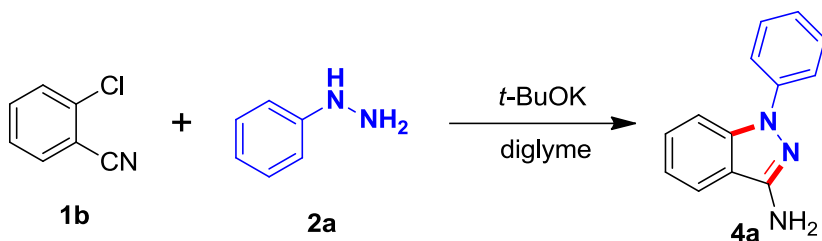

| Entry | Reaction condition    | Radical scavenger                           | <b>4a</b> (%) |
|-------|-----------------------|---------------------------------------------|---------------|
| 1     | 99.99% <i>t</i> -BuOK | TEMPO (1 equiv )                            | 91            |
| 2     | 99.99% <i>t</i> -BuOK | Ph <sub>2</sub> C=CH <sub>2</sub> (1 equiv) | 90            |
| 3     | 99.99% <i>t</i> -BuOK | TEMPO (2 equiv )                            | 90            |
| 4     | 99.99% <i>t</i> -BuOK | Ph <sub>2</sub> C=CH <sub>2</sub> (2 equiv) | 89            |

Using a nitrogen-filled glove box, an oven-dried pressure tube (38 mL volume) was charged with a magnetic stirring bar, *t*-BuOK (1.3 mmol), phenyl hydrazine (3.0 mmol), radical scavengers and diglyme (2.0 mL). After stirring of 5 minutes, 2-chlorobenzonitrile (1.0 mmol) was added the mixture reaction. Then the seal tube was closed tightly with a teflon cap, removed from the glove box and immersed into a pre-heated oil bath (design temperature). After design time the reaction was cooled, quenched with half-saturated brine and extracted with dichloromethane (4 x 15 mL). The combined organic phase was dried over Na<sub>2</sub>SO<sub>4</sub> and concentrated. A small aliquot of the organic phase was analyzed by GC to monitor product formation.

#### 6.4 Control experiments with 18-crown-6 additive

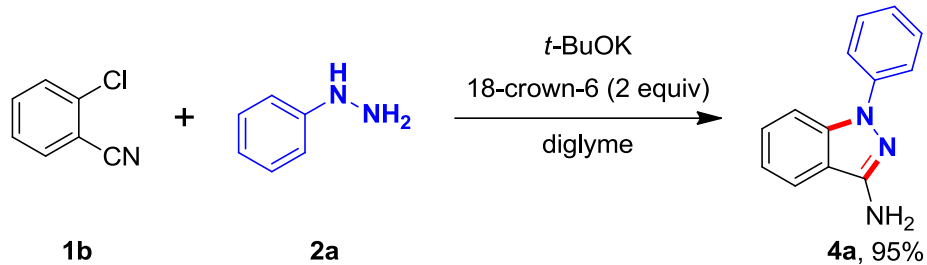

Using a nitrogen-filled glove box, an oven-dried pressure tube (38 mL volume) was charged with a magnetic stirring bar, *t*-BuOK (1.3 mmol), phenyl hydrazine (3.0 mmol), 18-crown-6 (2.0 mmol) and diglyme (2.0 mL). After stirring of 5 minutes, 2-chlorobenzonitrile (1.0 mmol) was added the mixture reaction. Then the seal tube was closed tightly with a teflon cap, removed from the glove box and immersed into a pre-heated oil bath (design temperature). After design time the reaction was cooled, quenched with half-saturated brine and extracted with dichloromethane (4 x 15 mL). The combined organic phase was dried over Na<sub>2</sub>SO<sub>4</sub> and concentrated. A small aliquot of the organic phase was analyzed by GC to monitor product formation.

## 7. References

1. Vasudevan, A.; Souers, A. J.; Freeman, J. C.; Verzal, M. K.; Gao, J.; Mulhern, M. M.; Wodka, D.; Lynch, J. K.; Engstrom, K. M.; Wagaw, S. H.; Brodjian, S.; Dayton, B.; Falls, D. H.; Bush, E.; Brune, M.; Shapiro, R. D.; Marsh, K. C.; Hernandez, L. E.; Collins, C. A.; Kym, P. R. *Bioorg. Med. Chem. Lett.* **2005**, *15*, 5293.
2. Kruger, A. W.; Rozema, M. J.; Chu-Kung, A.; Gandarilla, J.; Haight, A. R.; Kotecki, B. J.; Richter, S. M.; Schwartz, A. M.; Wang, Z. *Org. Process. Res. Dev.* **2009**, *13*, 1419.
3. Antonysamy, S.; Hirst, G.; Park, F.; Sprengeler, P.; Stappenbeck, F.; Steensma, R.; Wilson, M.; Wang, M. *Bioorg. Med. Chem. Lett.* **2009**, *19*, 279.

## 8. Copies for $^1\text{H}$ NMR and $^{13}\text{C}$ NMR of the 3-aminoindazoles

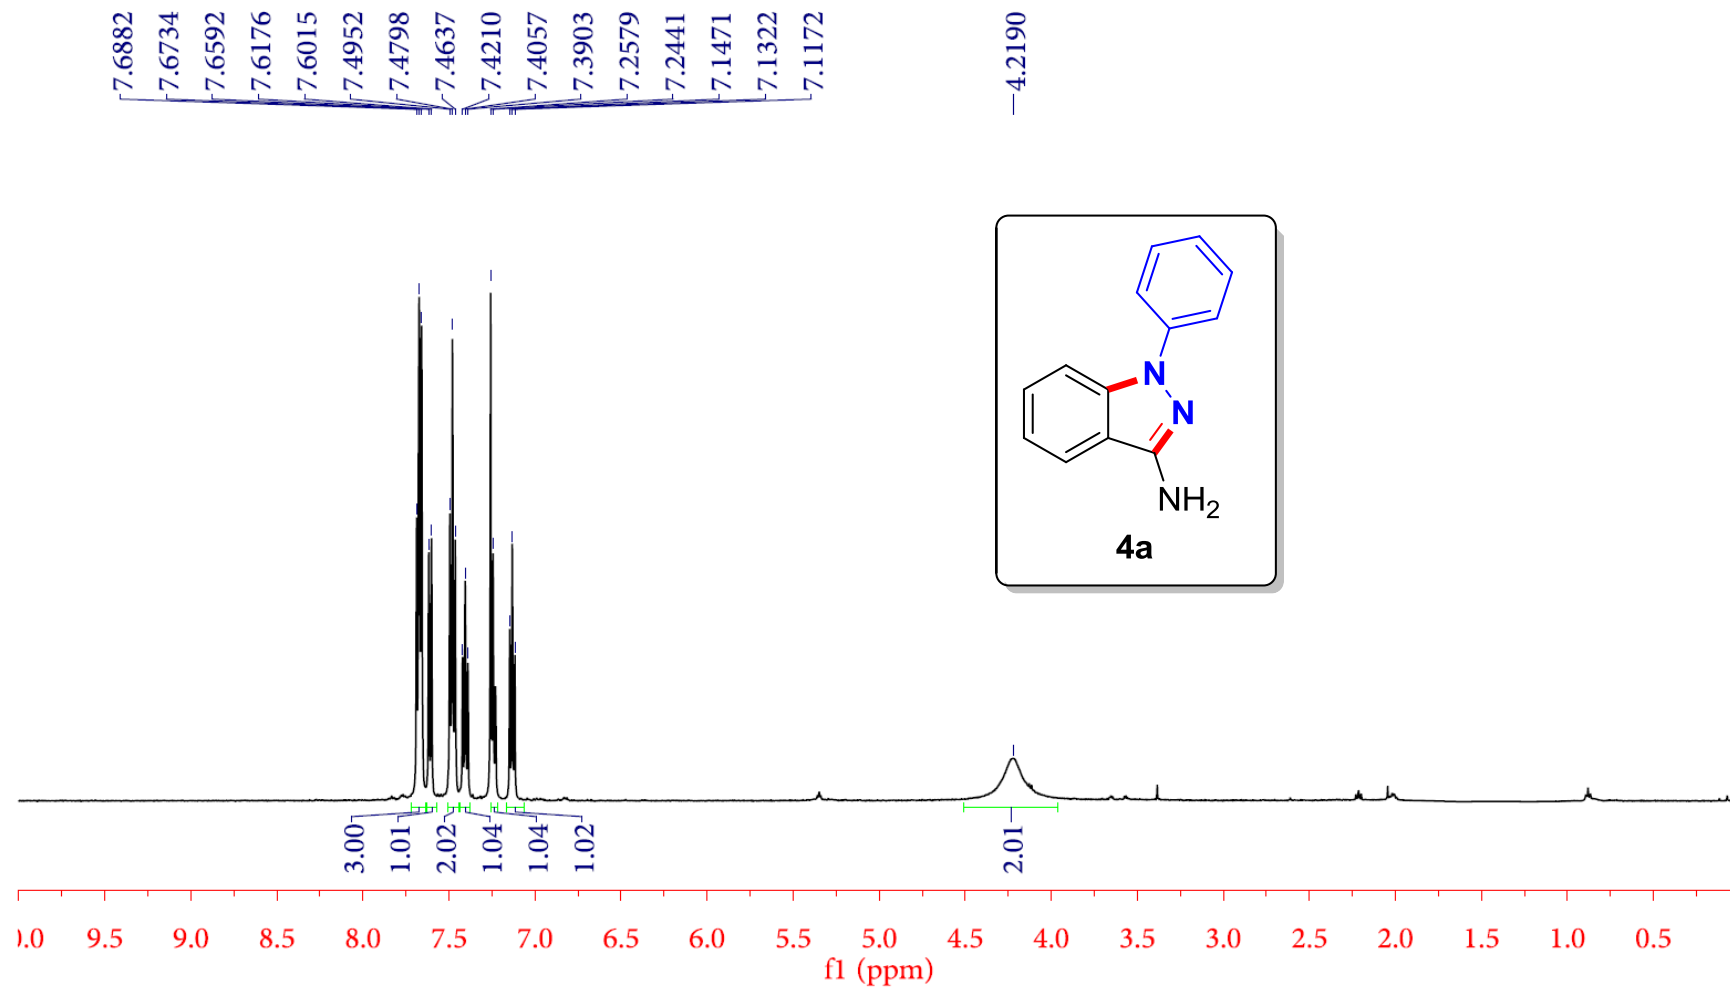

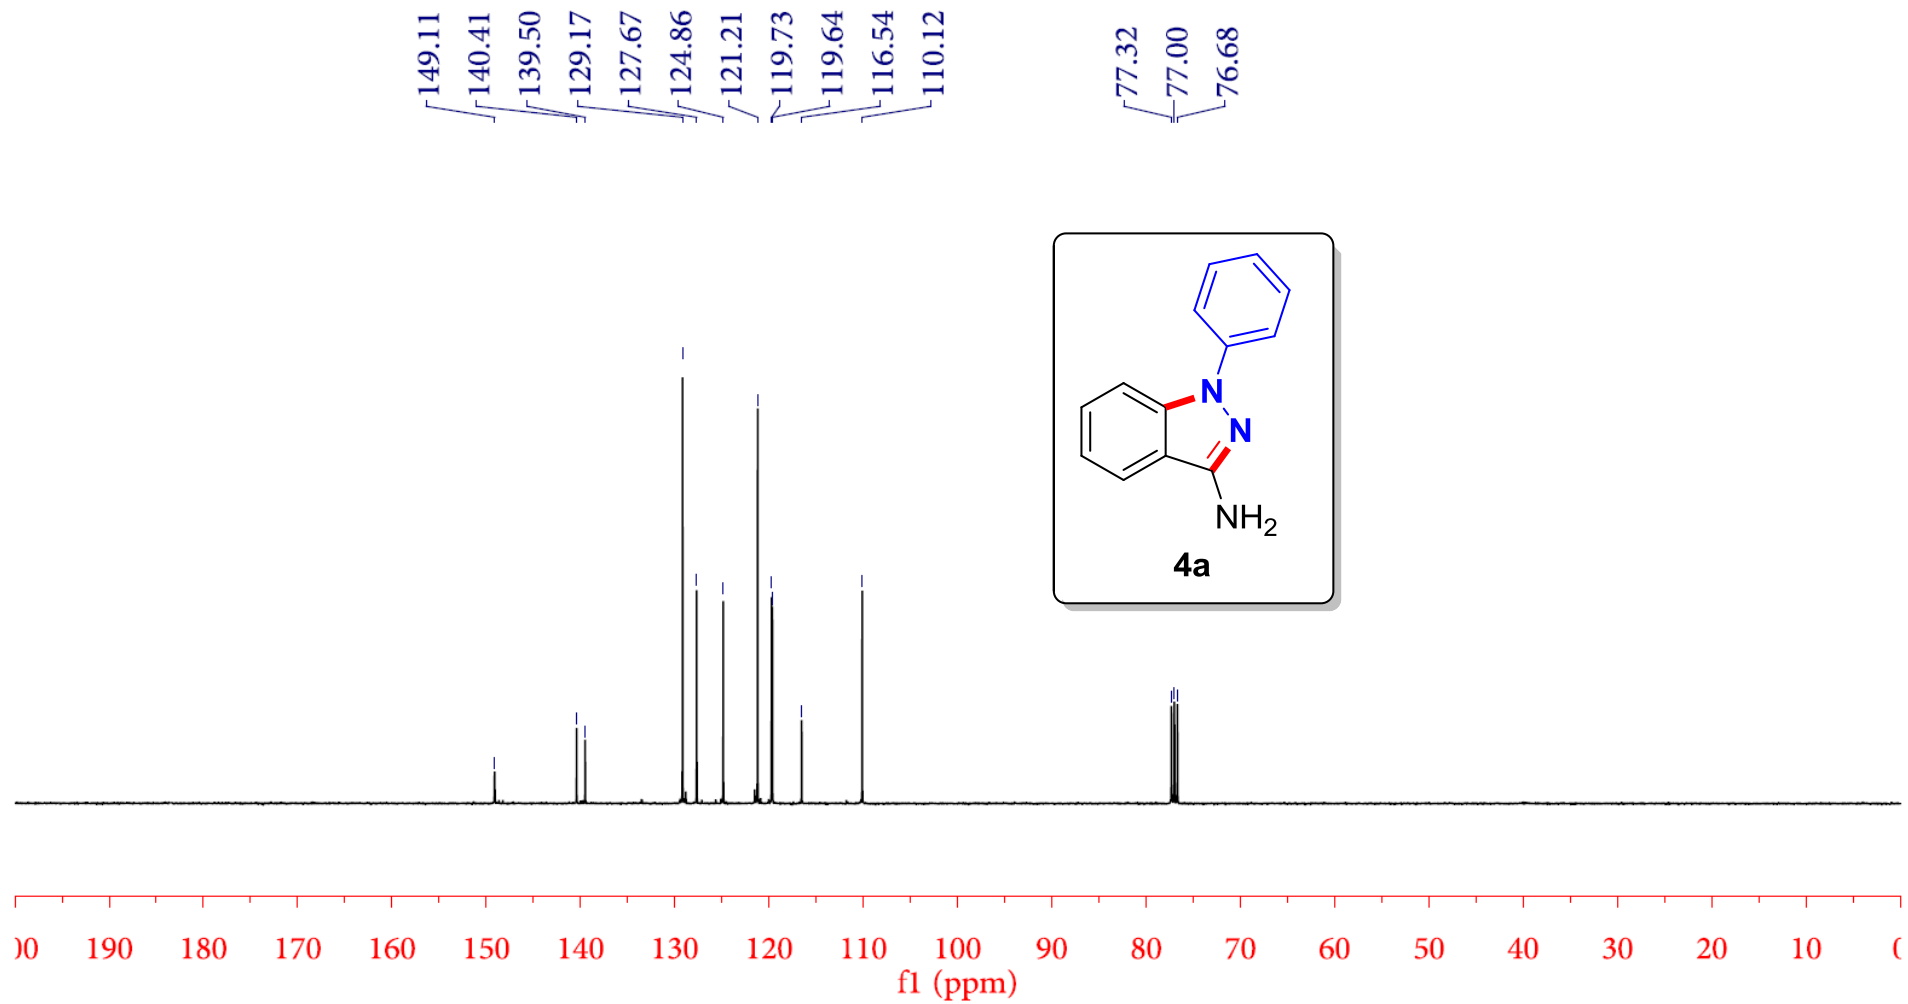

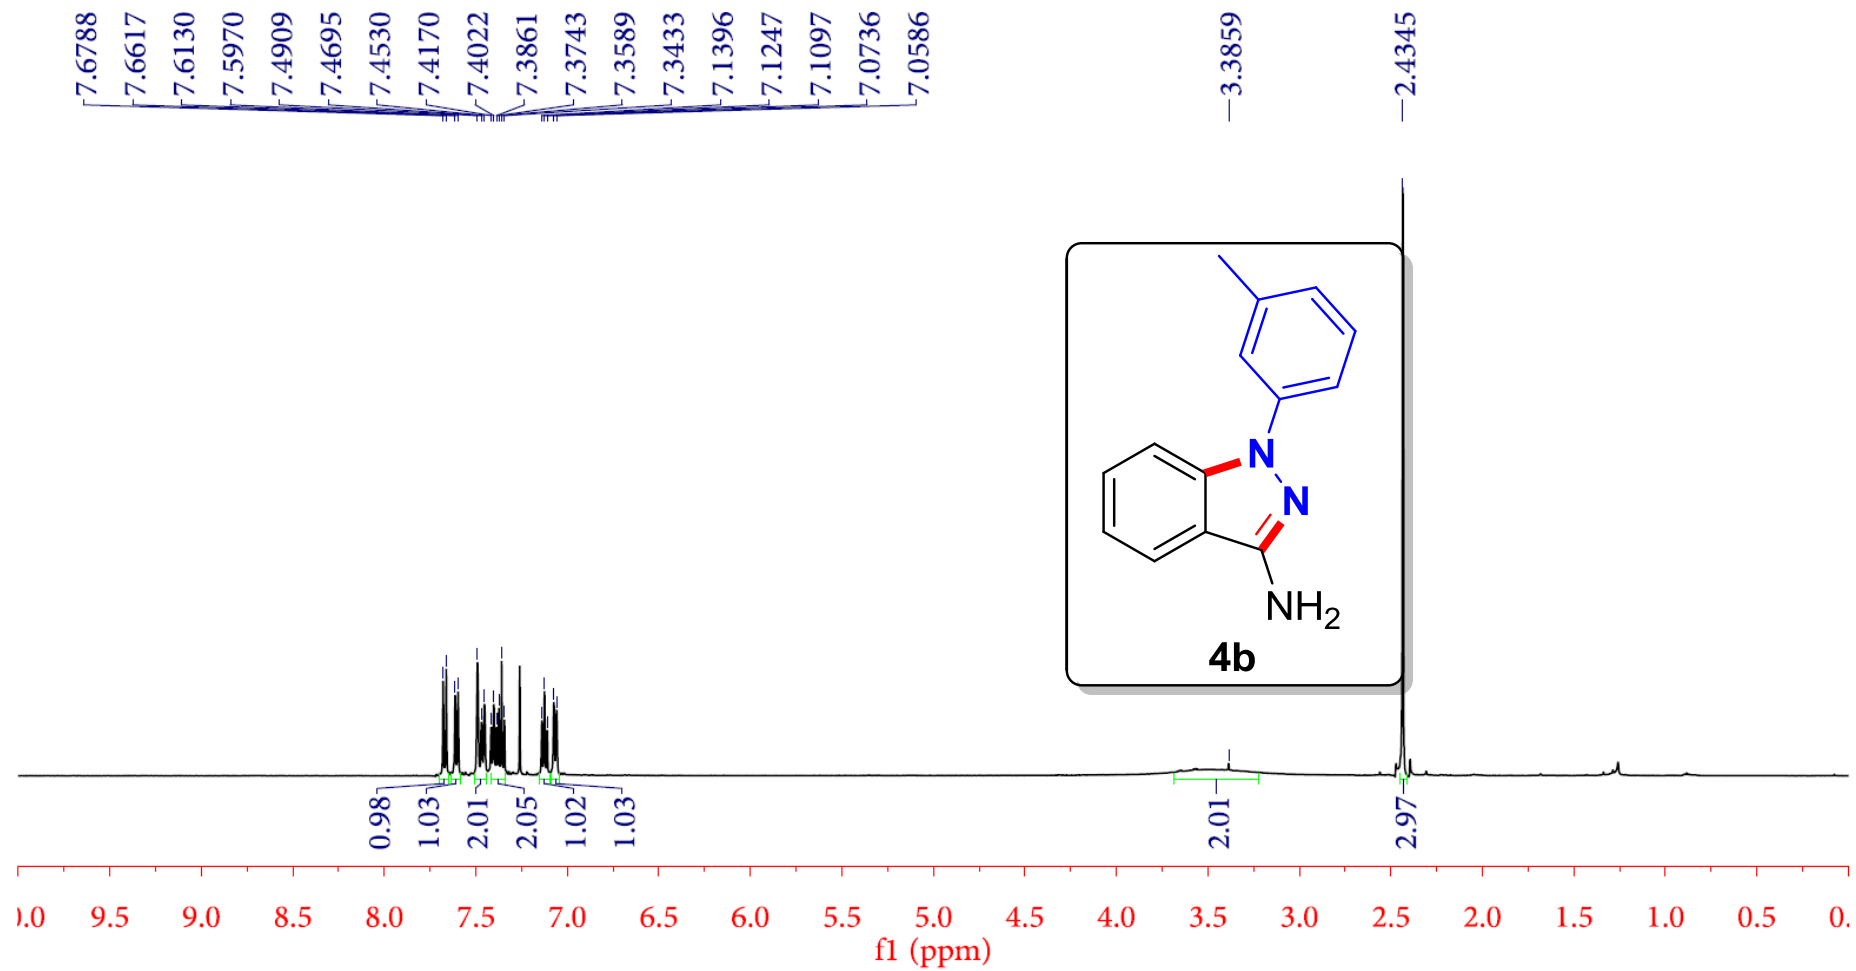

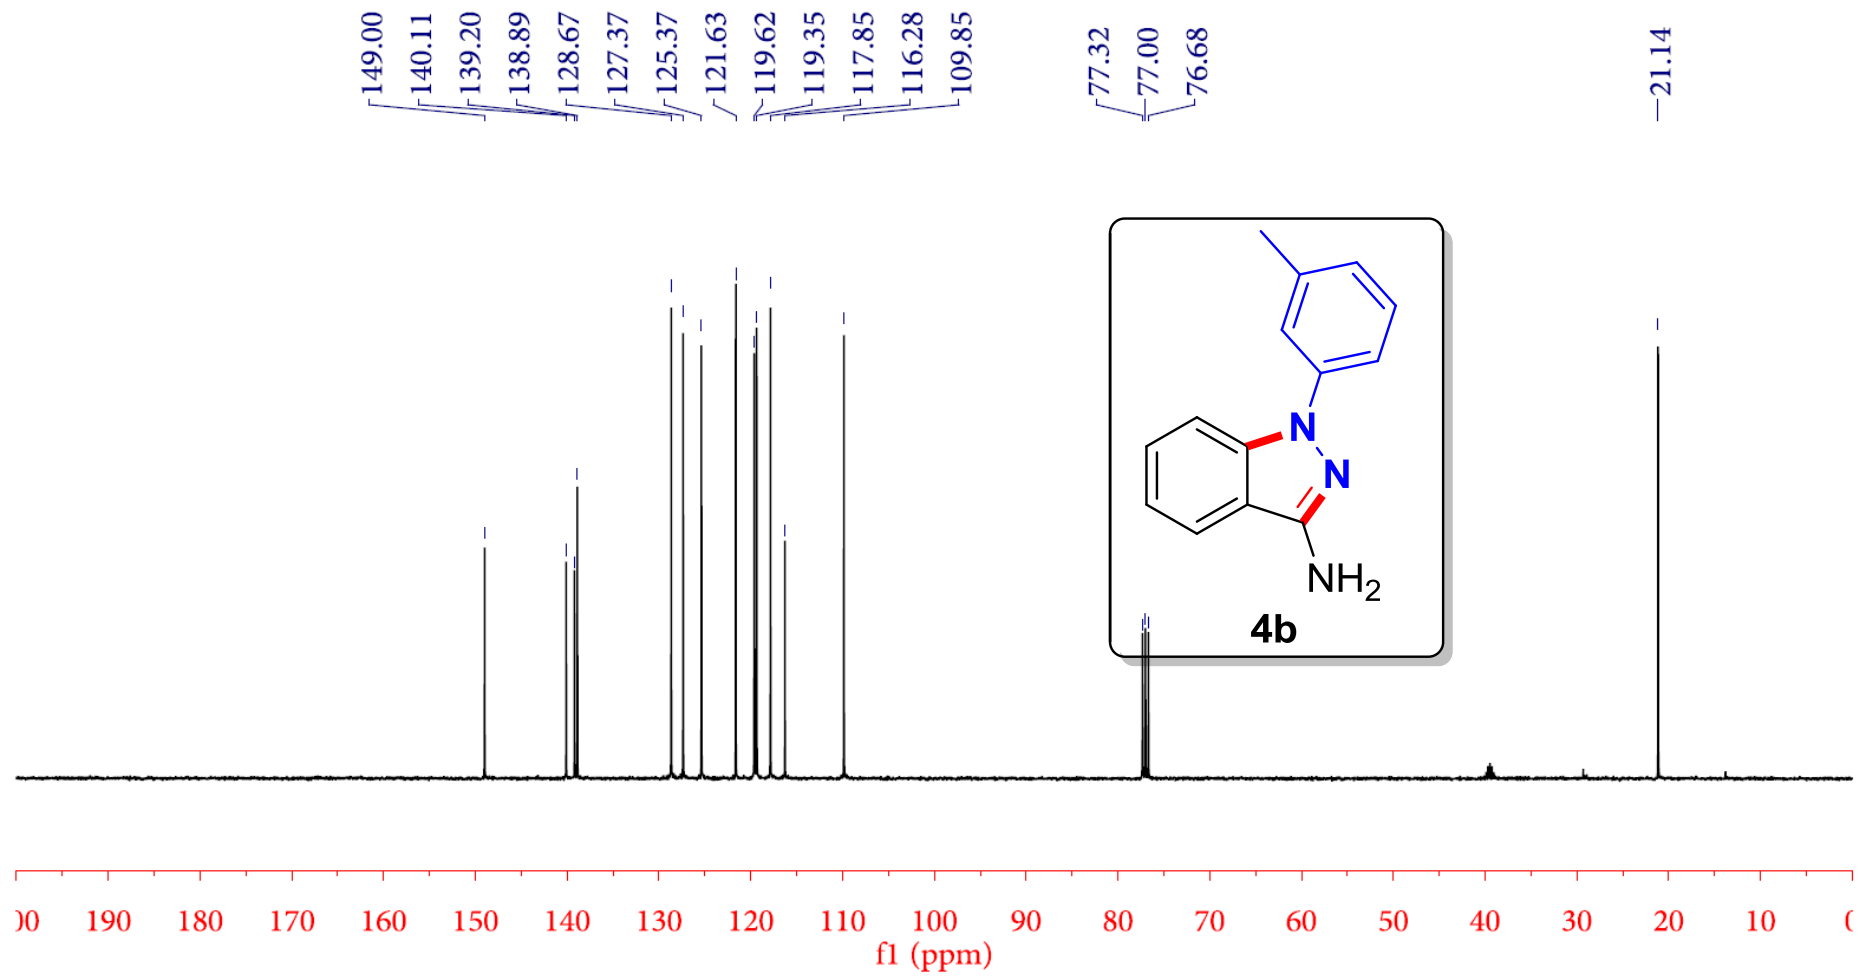

7.7125  
7.6954  
7.6244  
7.6083  
7.4892  
7.4724  
7.4461  
7.4303  
7.4175  
7.4141  
7.4096  
7.2603  
7.1817  
7.1667  
7.1517  
6.9443  
6.9397  
6.9279  
6.9238  
6.9117  
6.9073

—3.0511

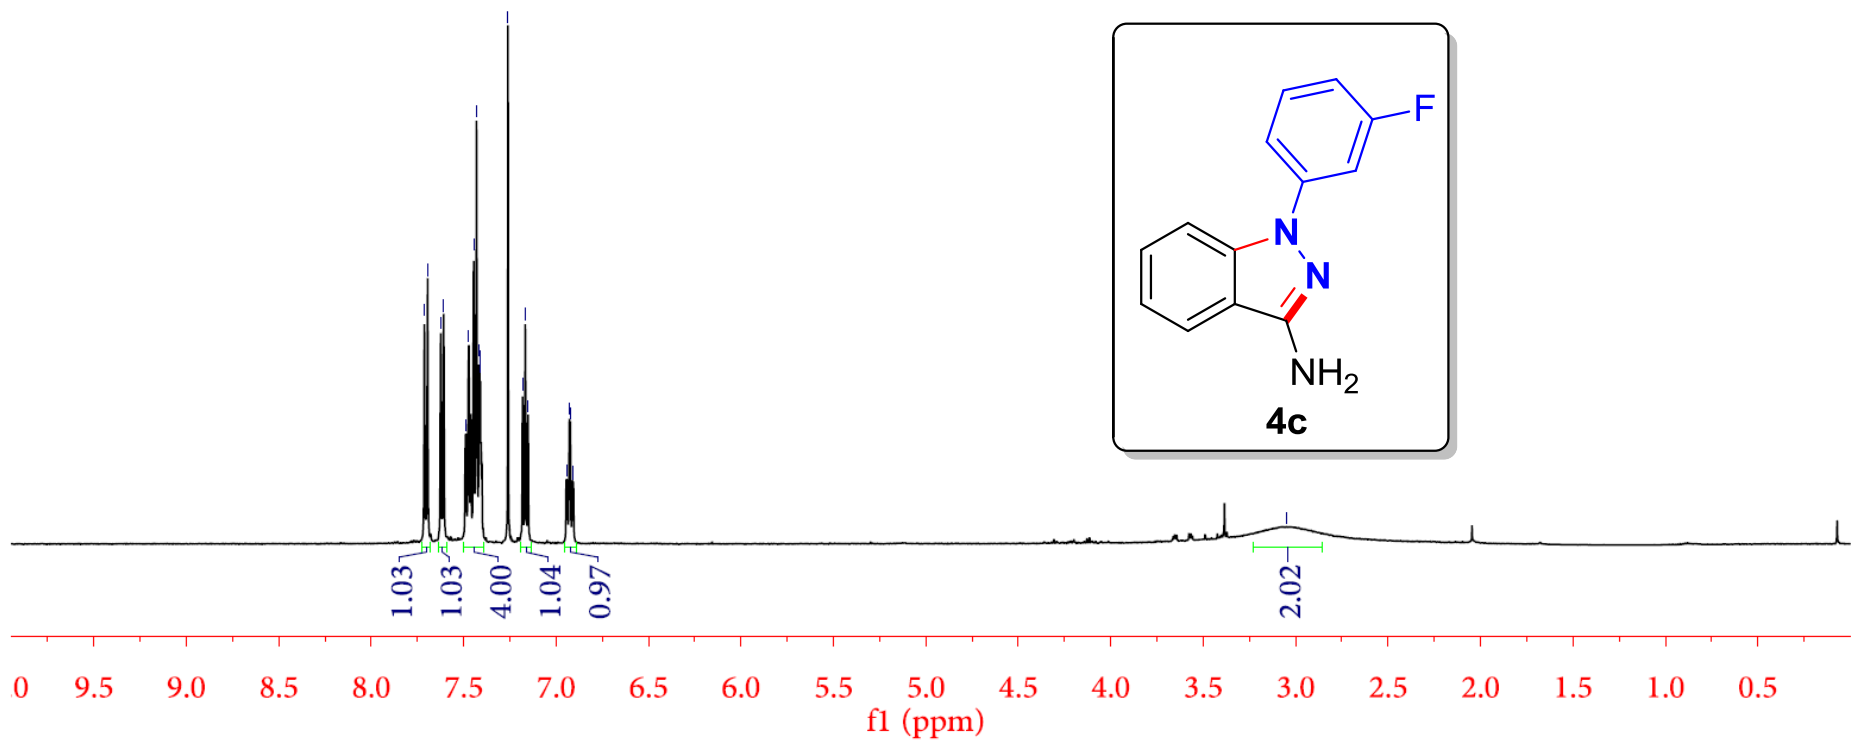



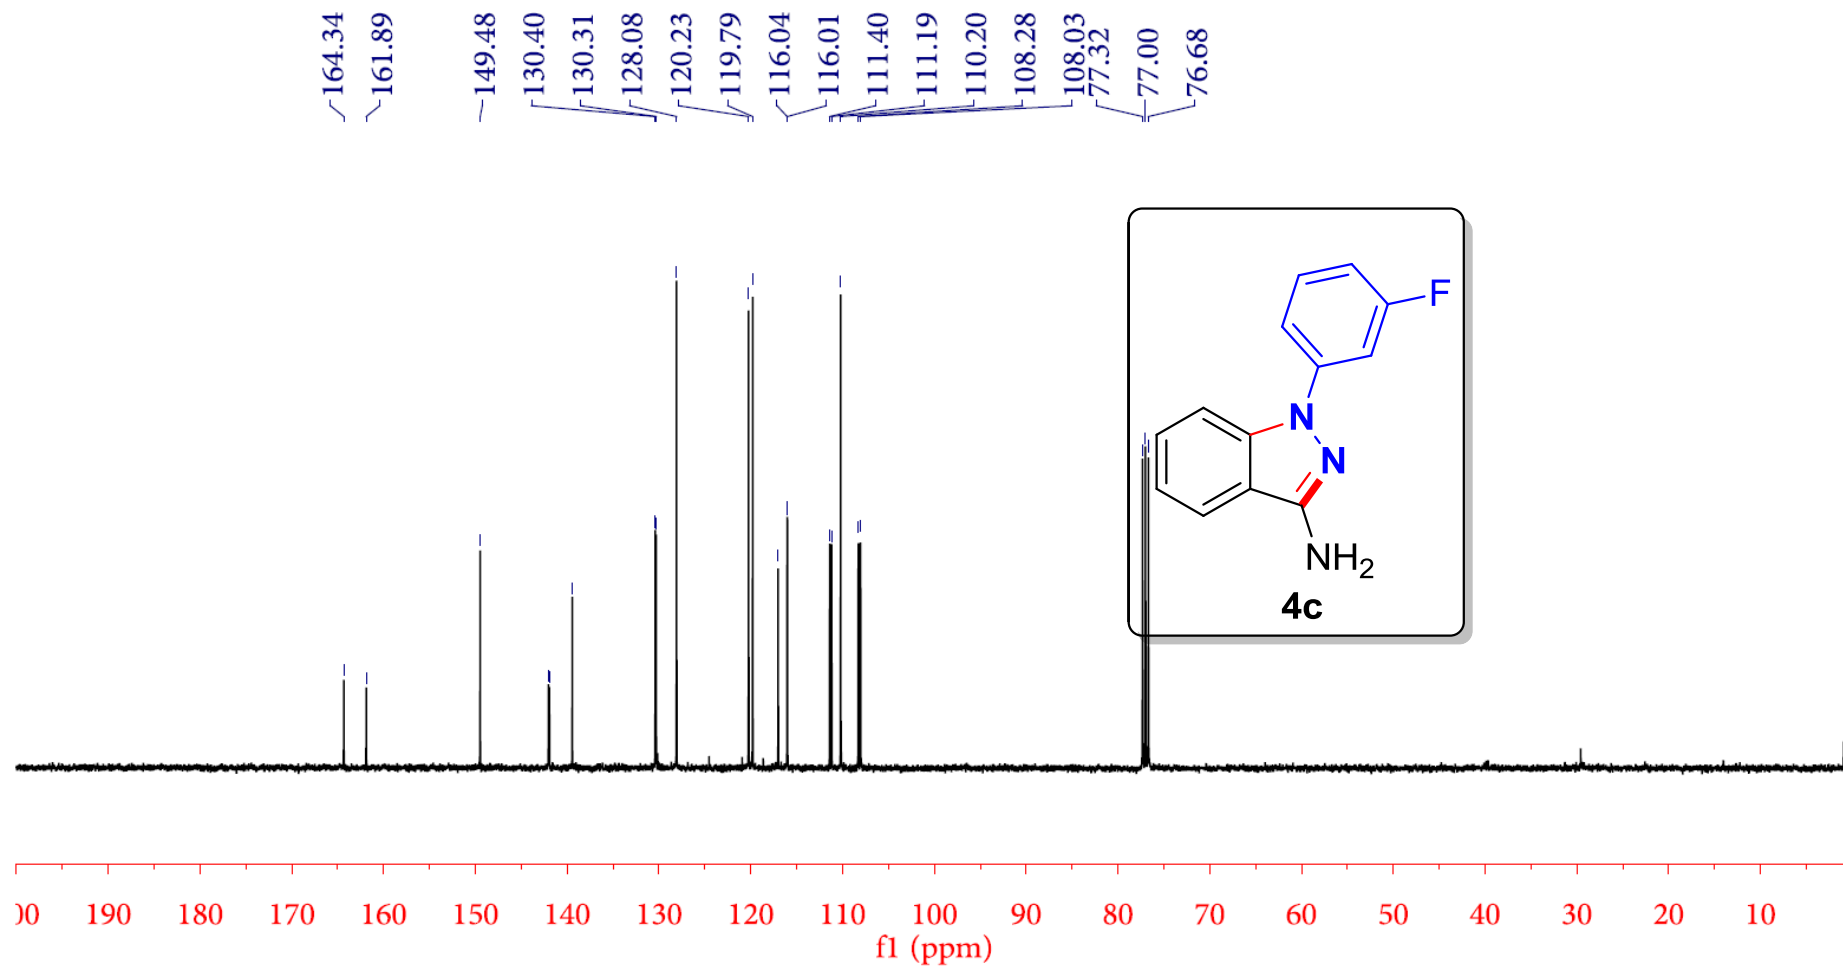

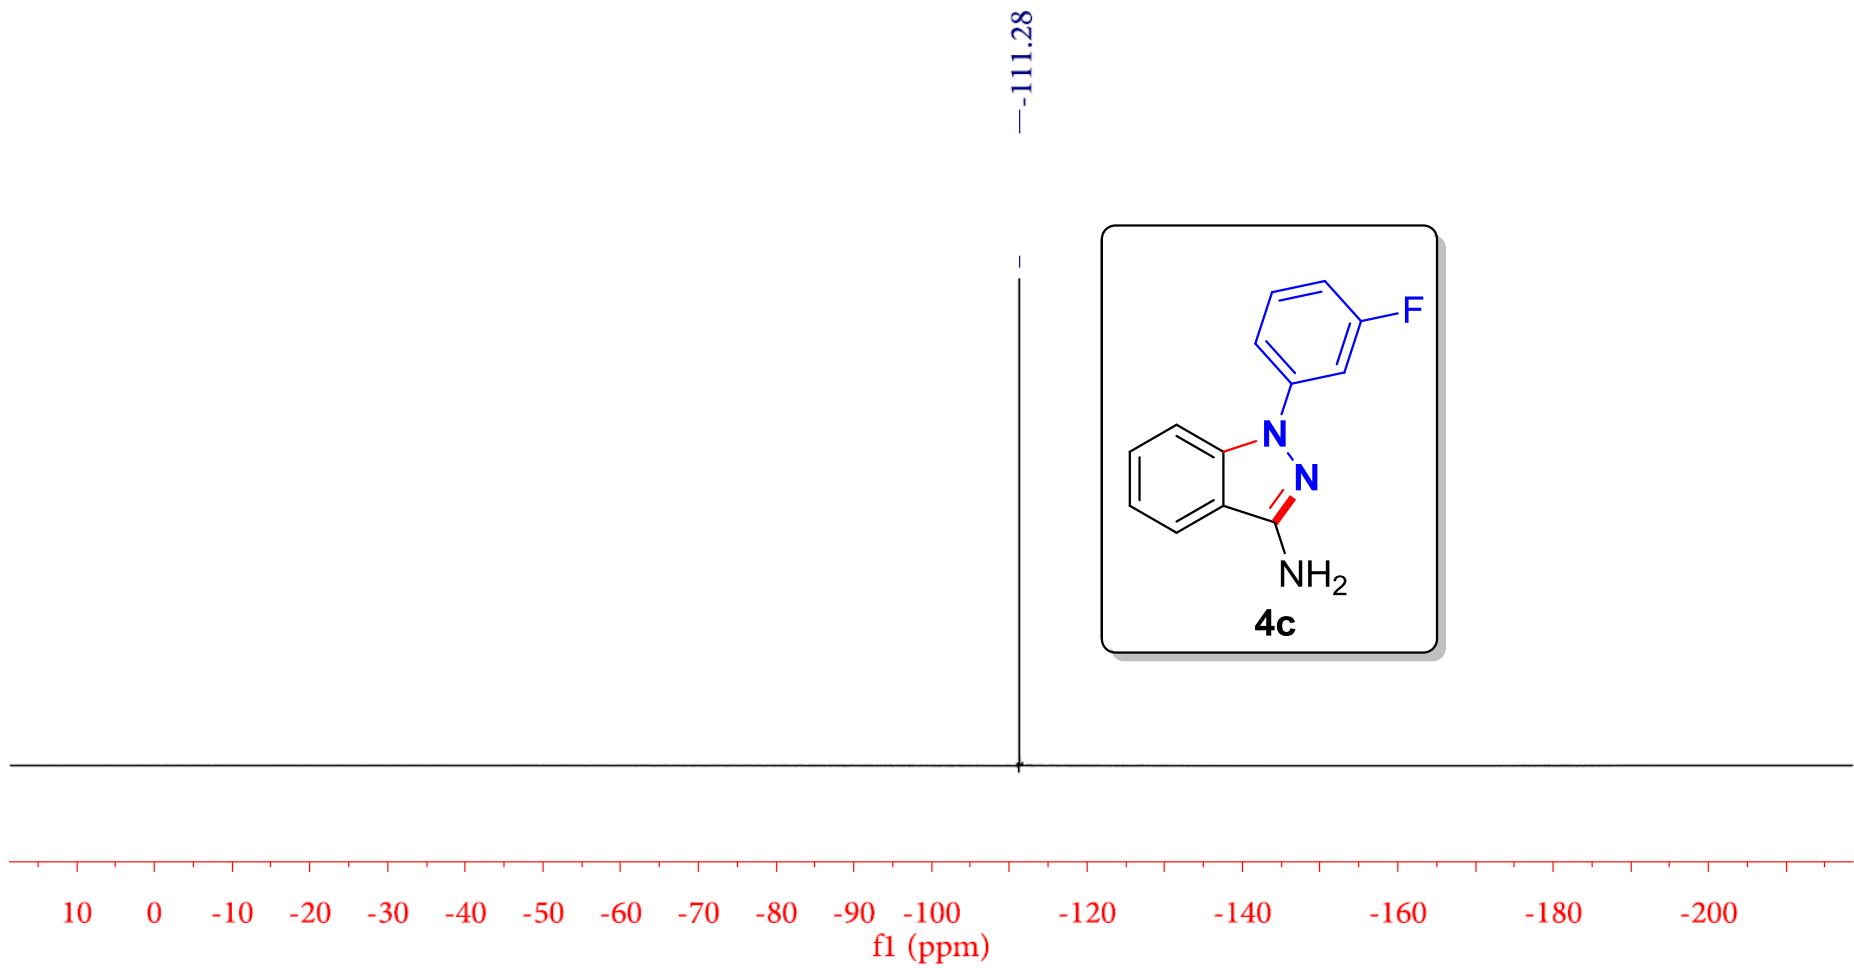

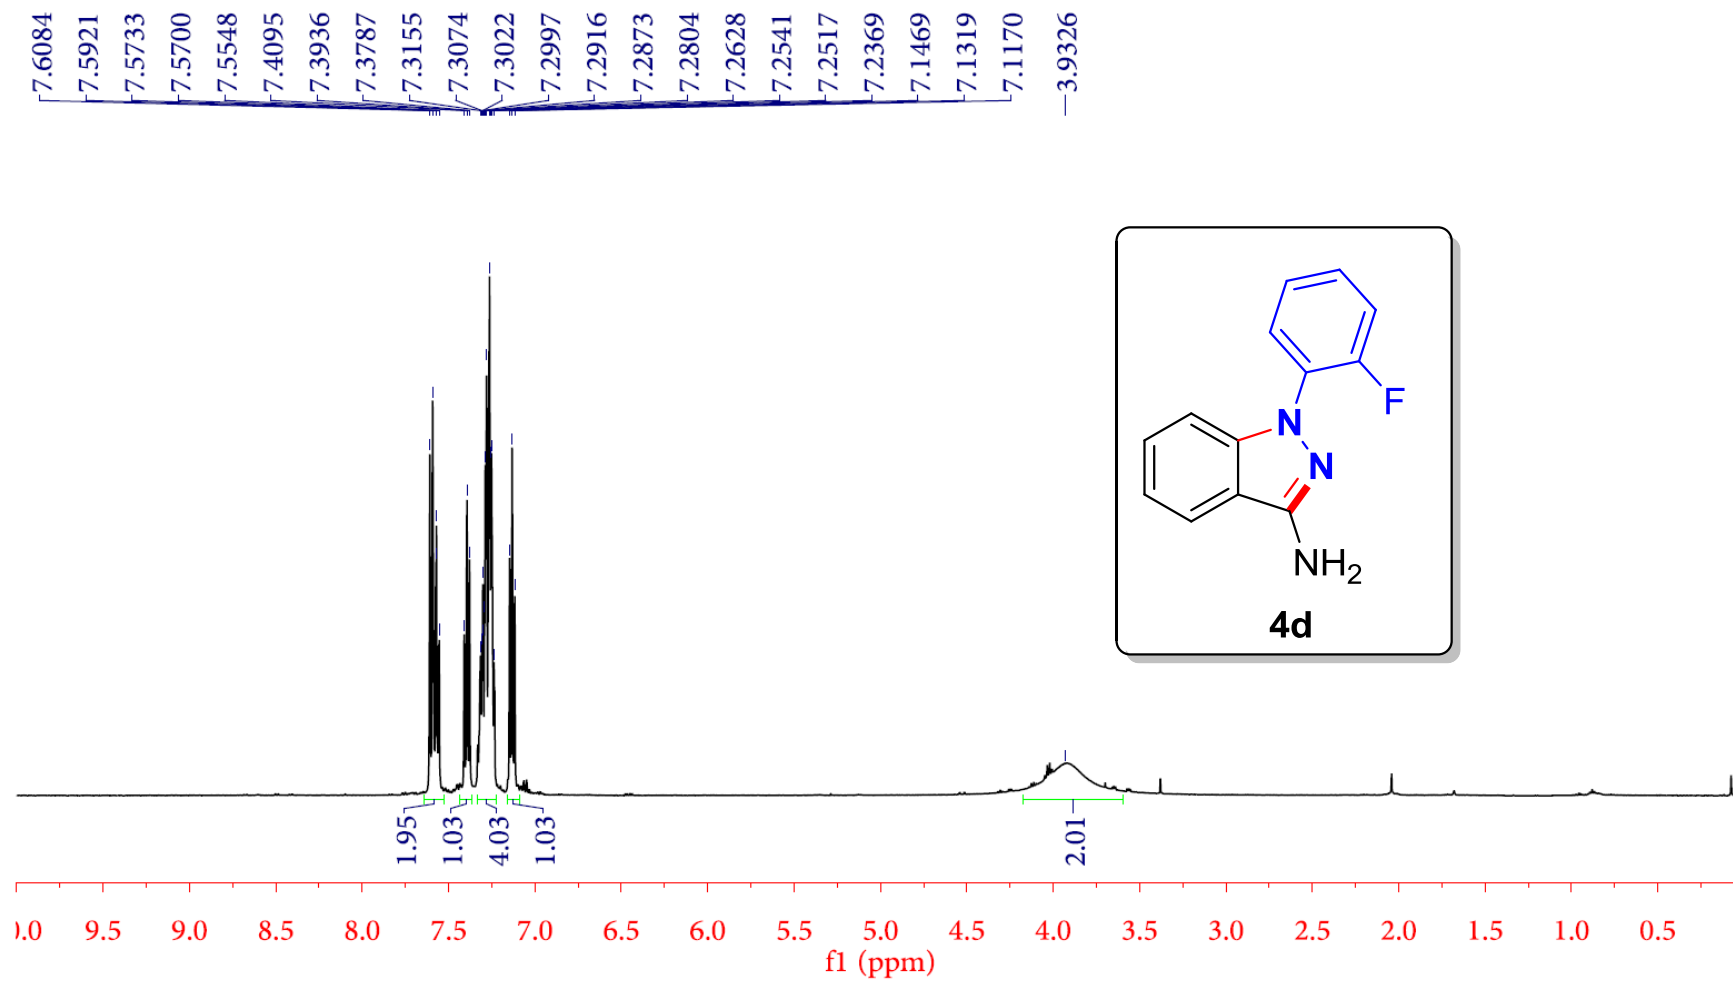

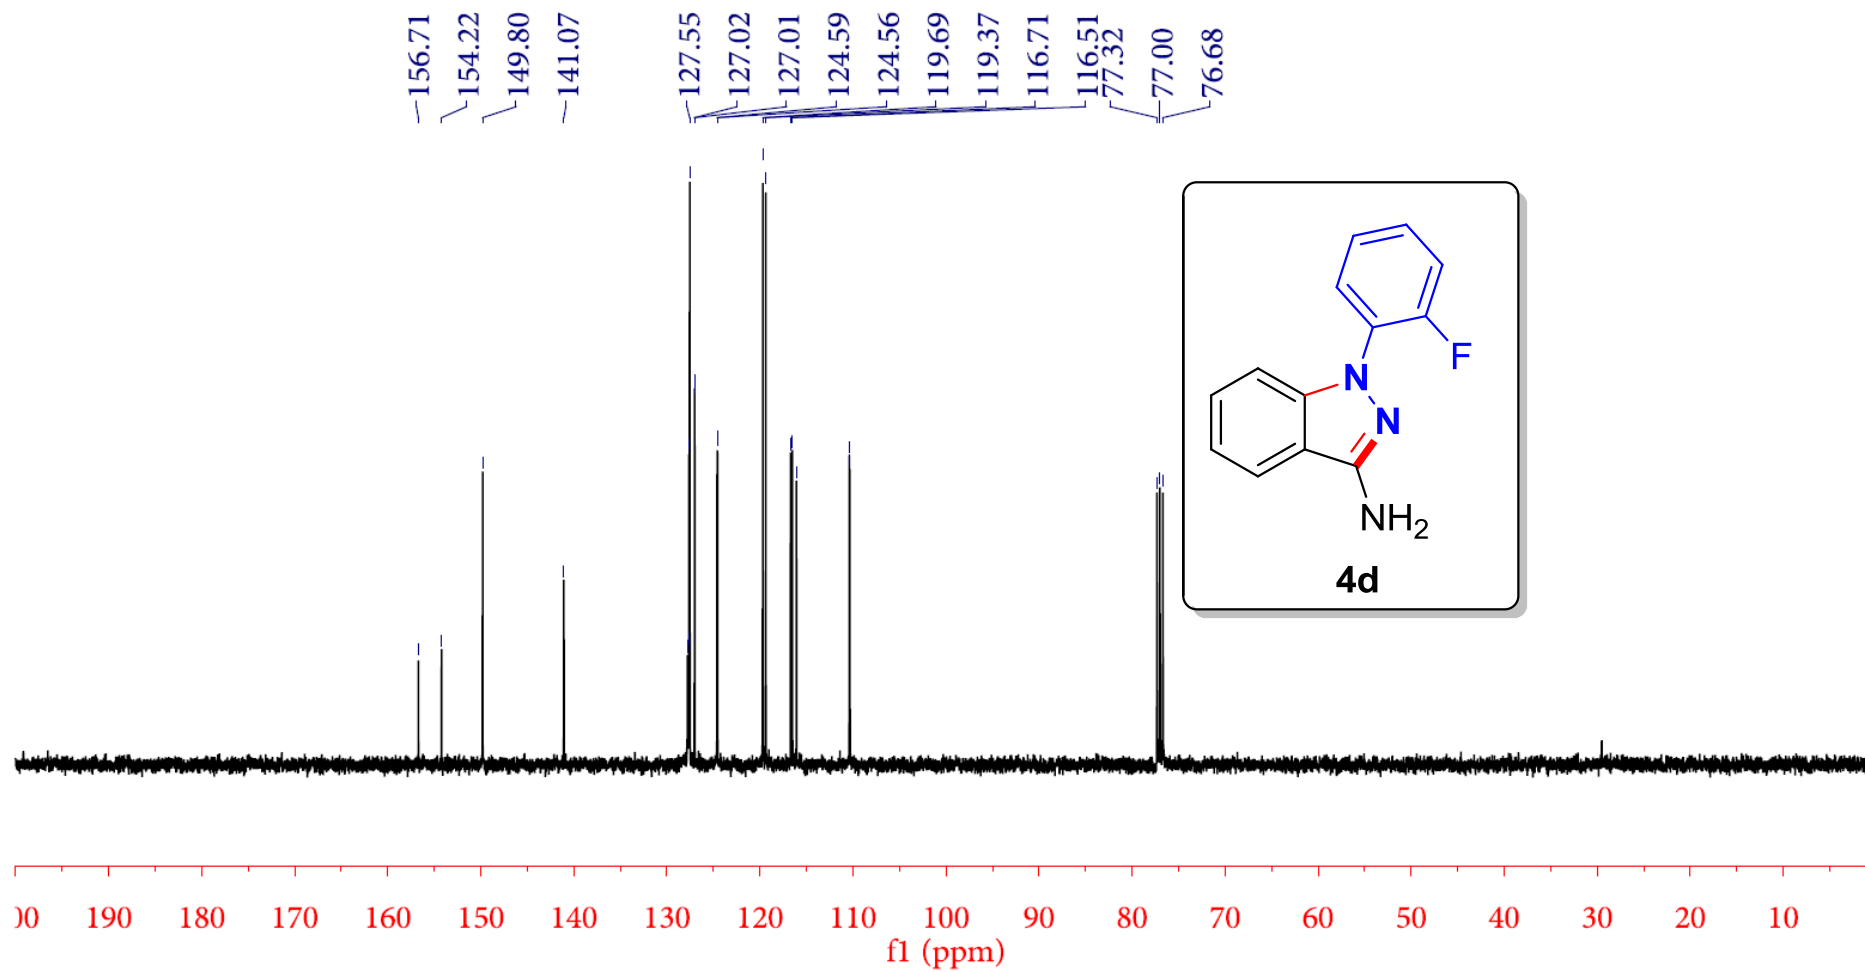

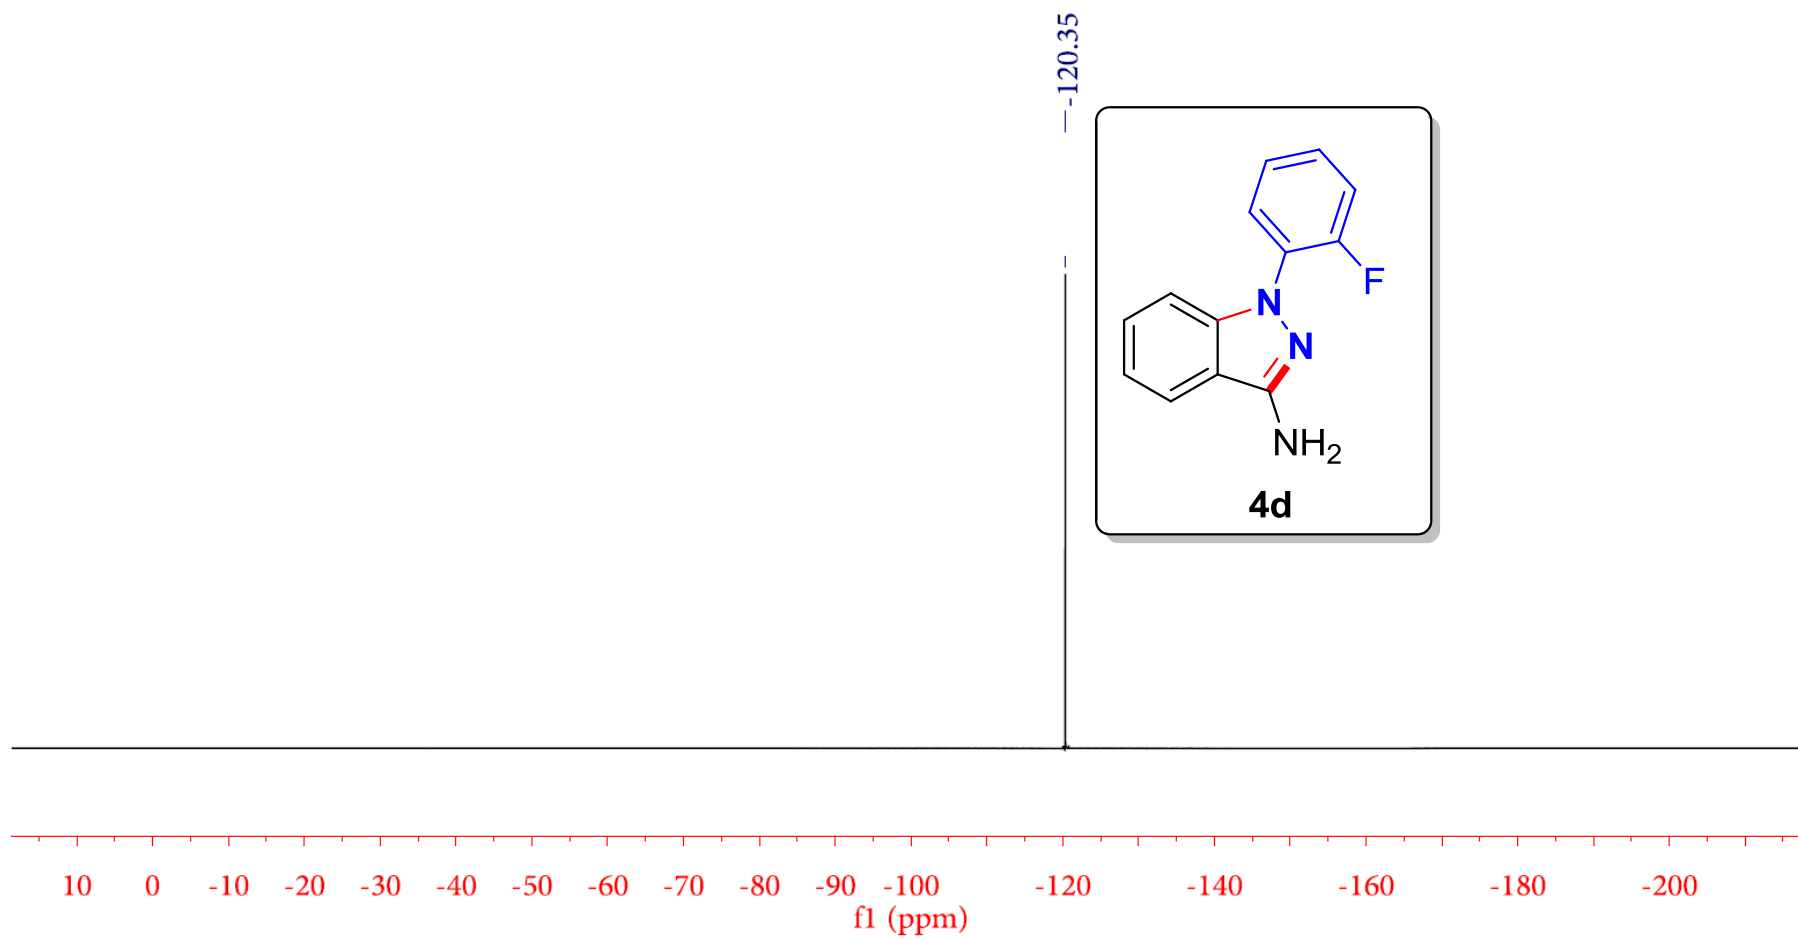

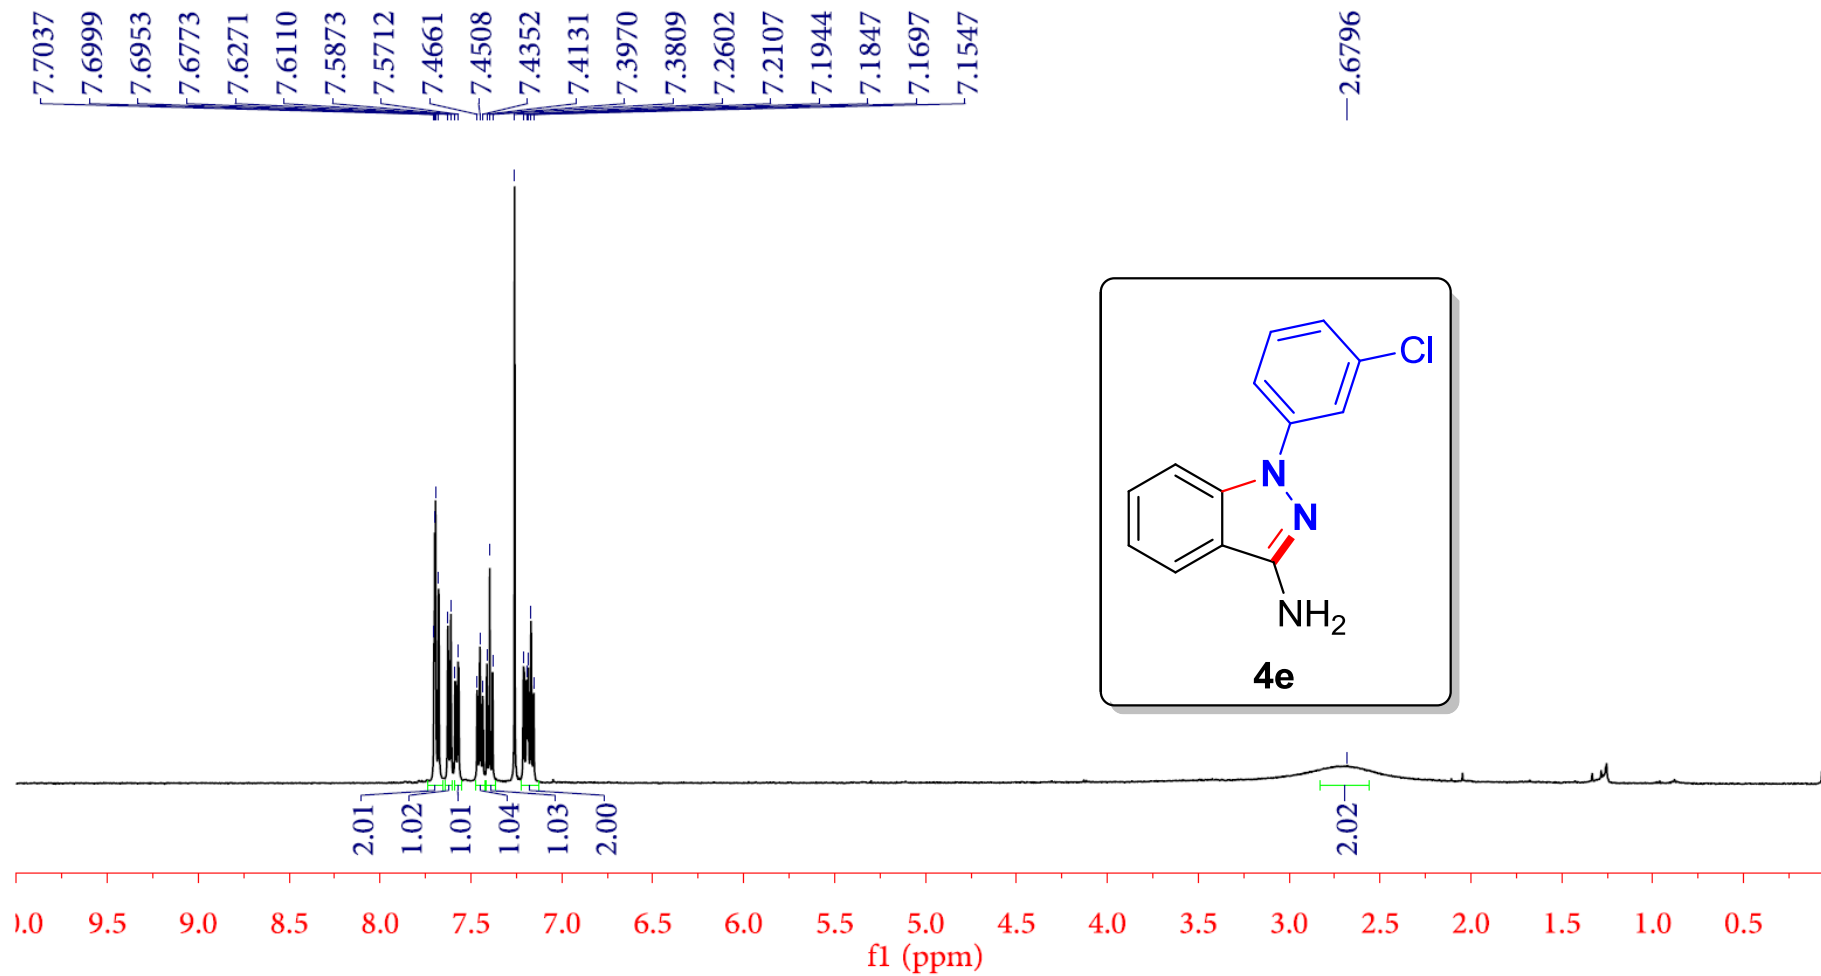

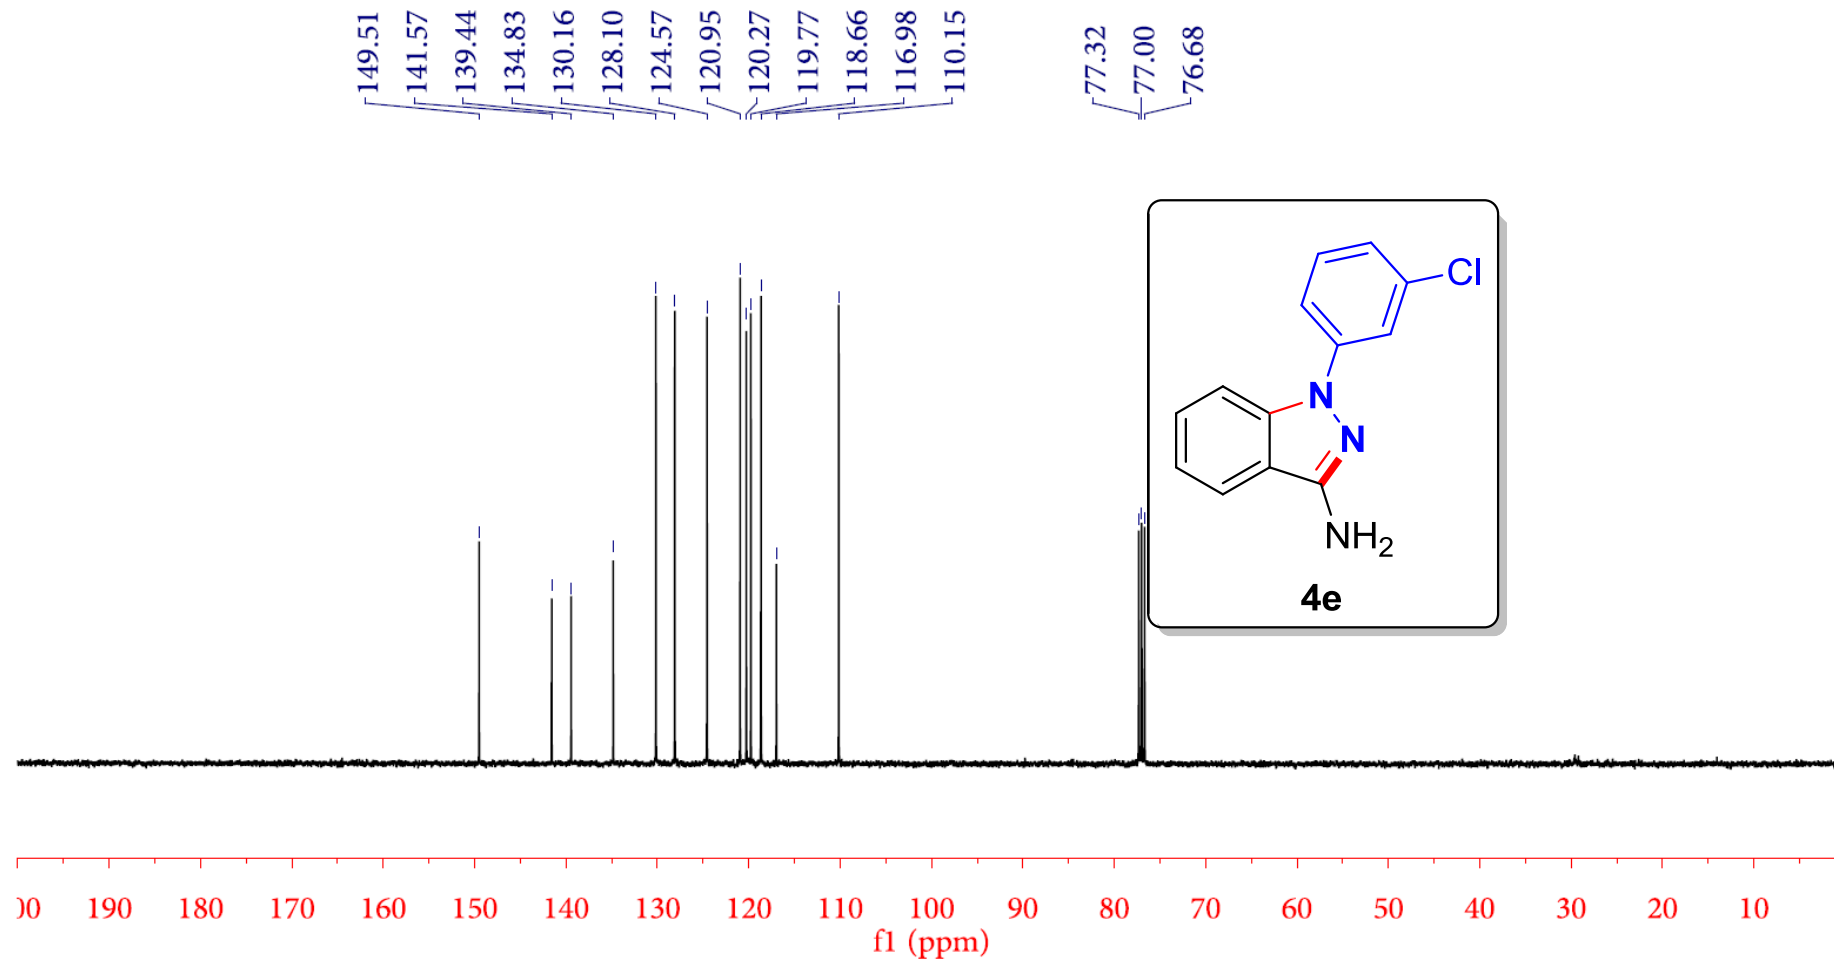

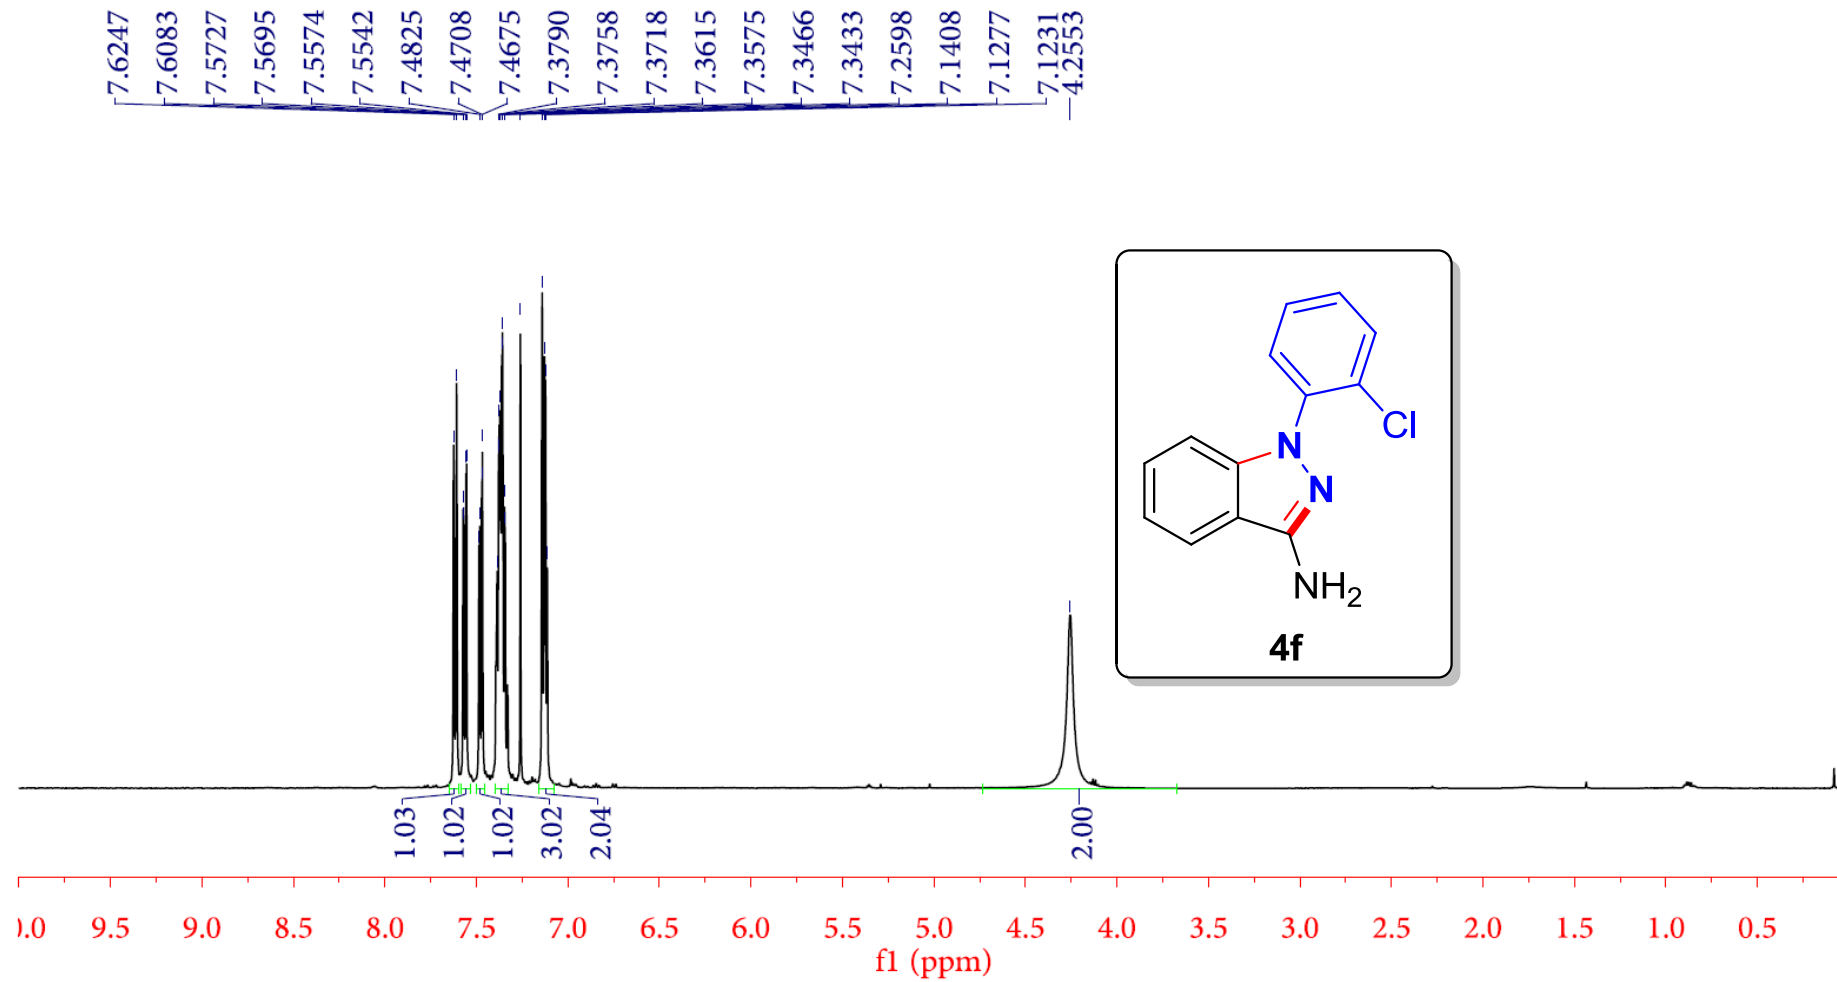



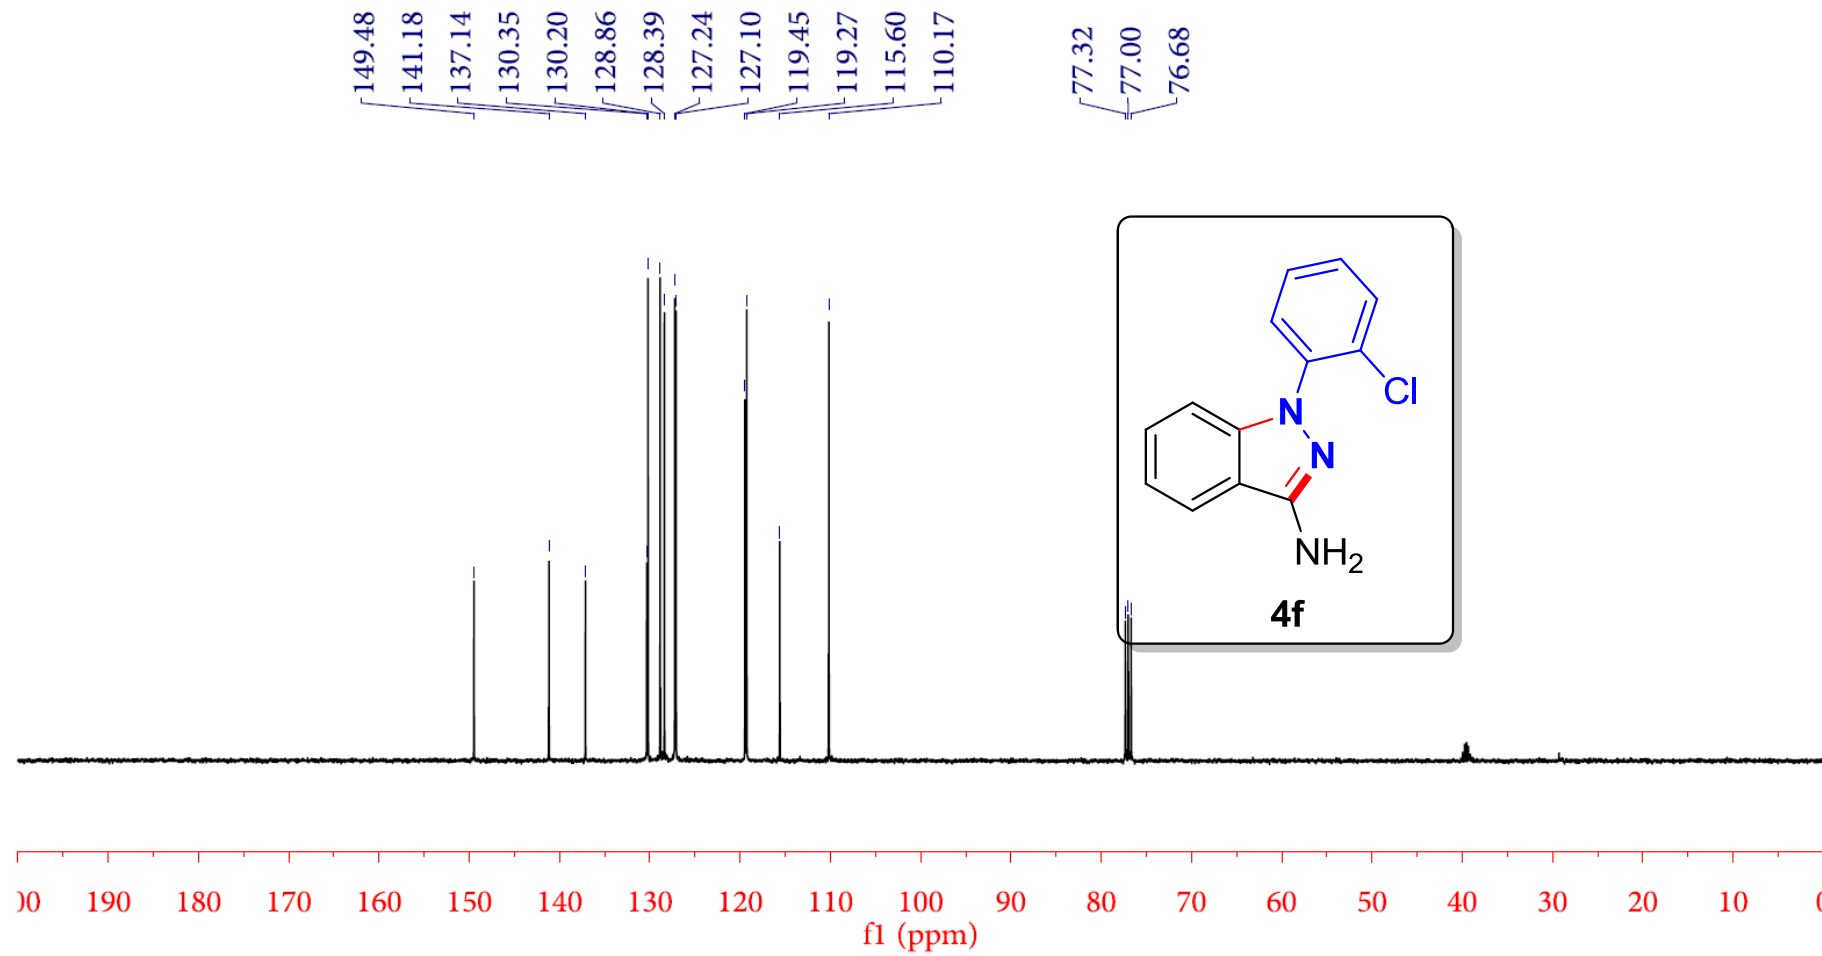

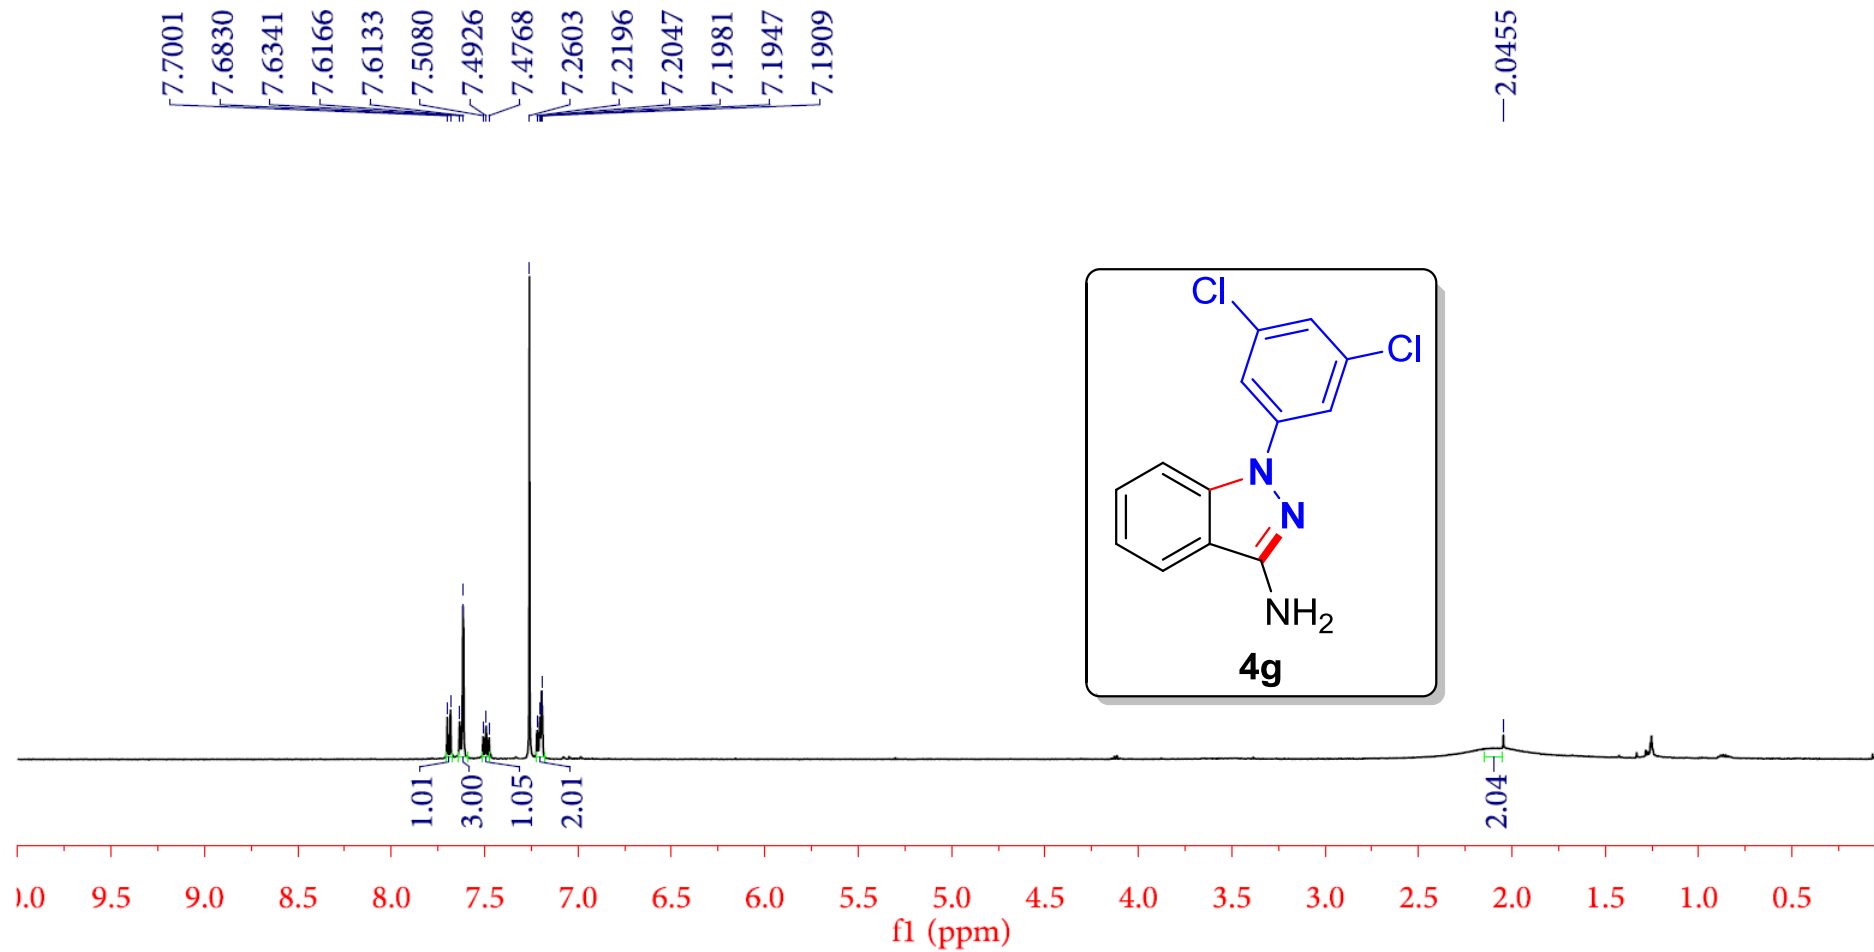

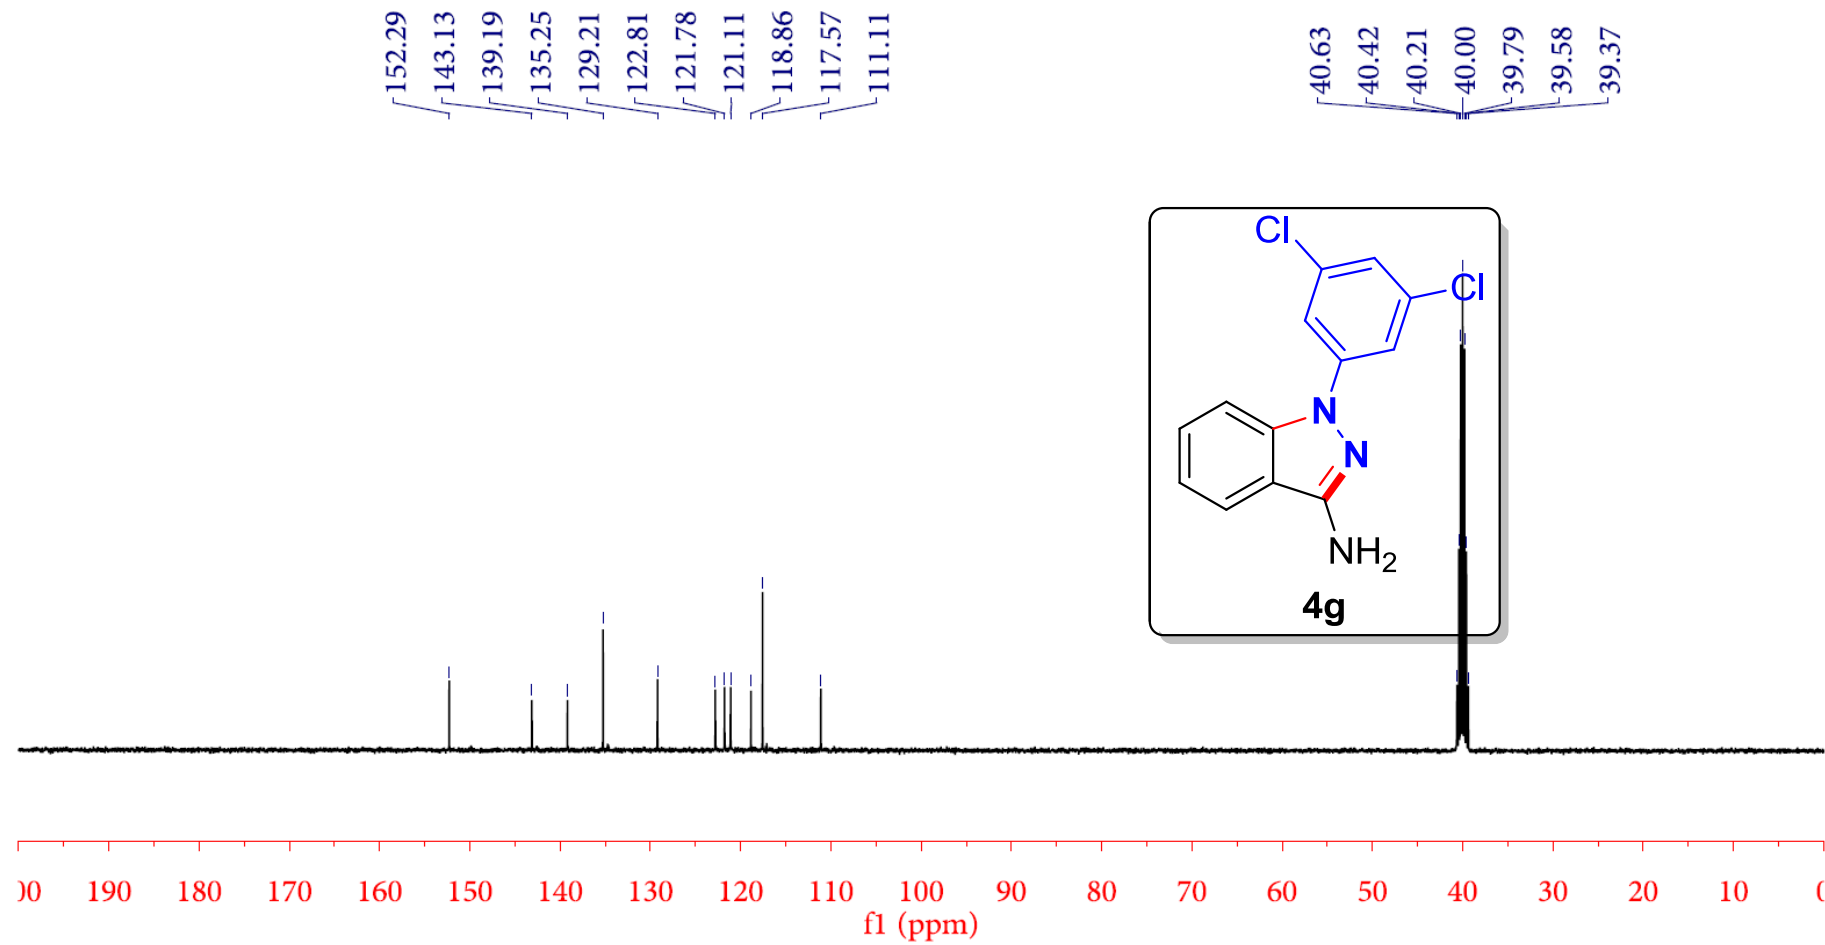

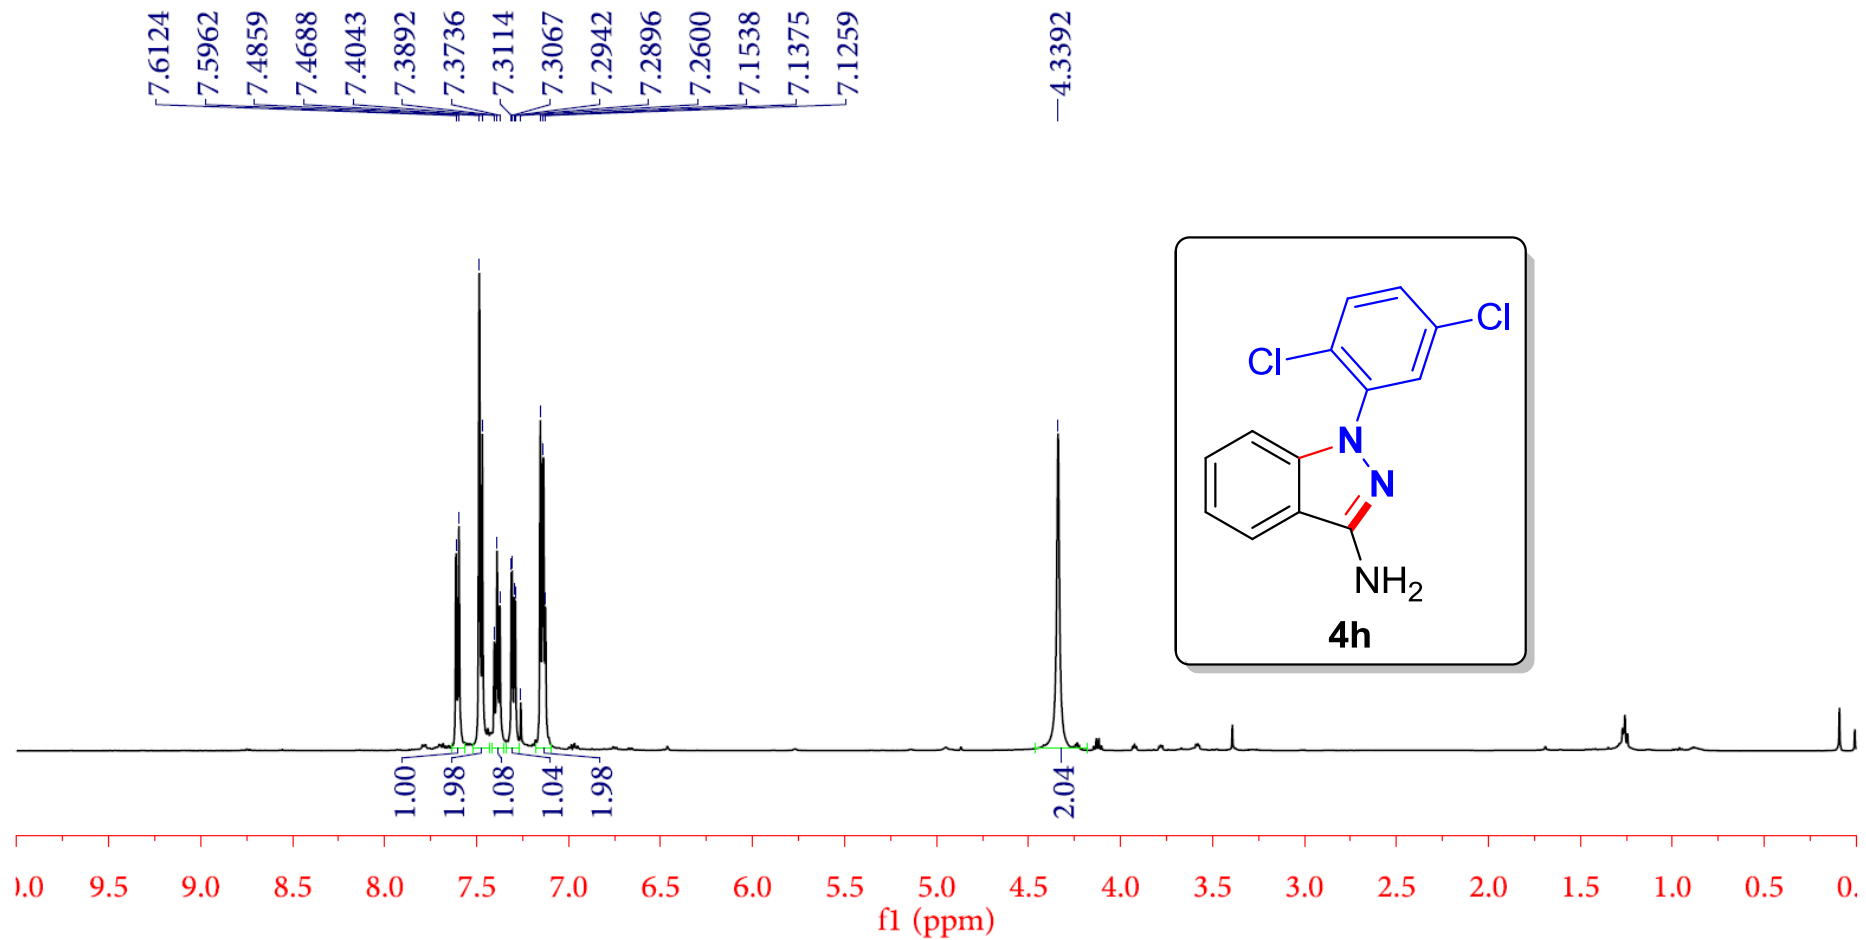

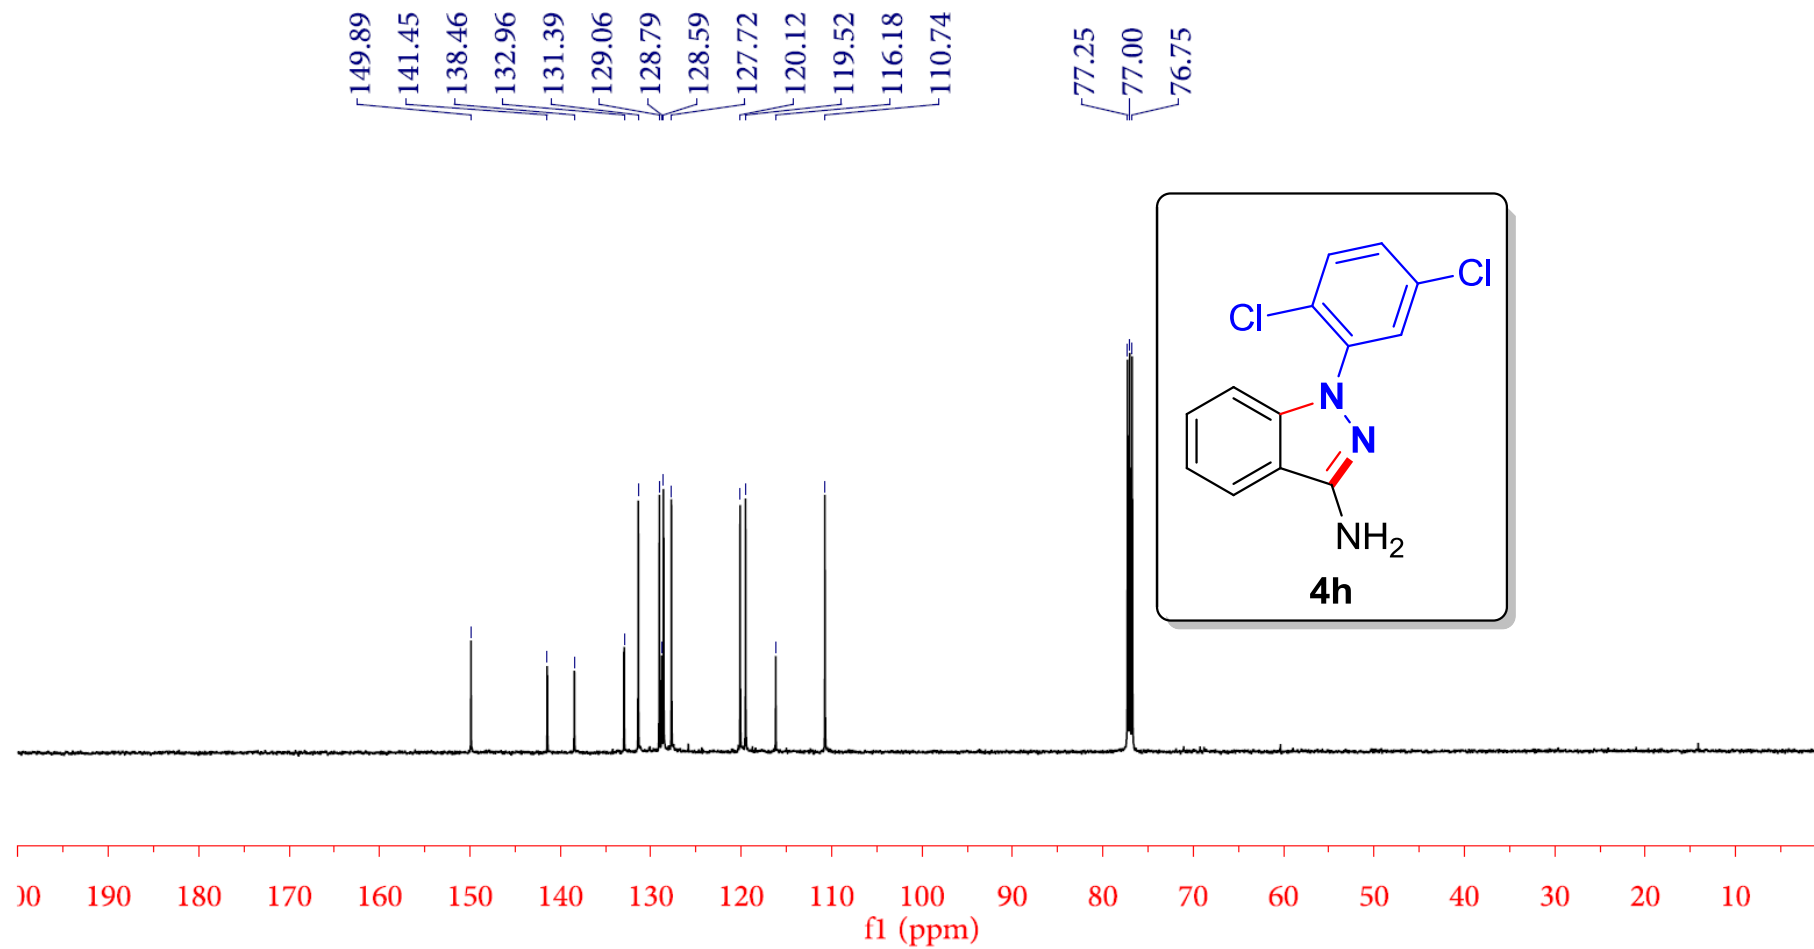

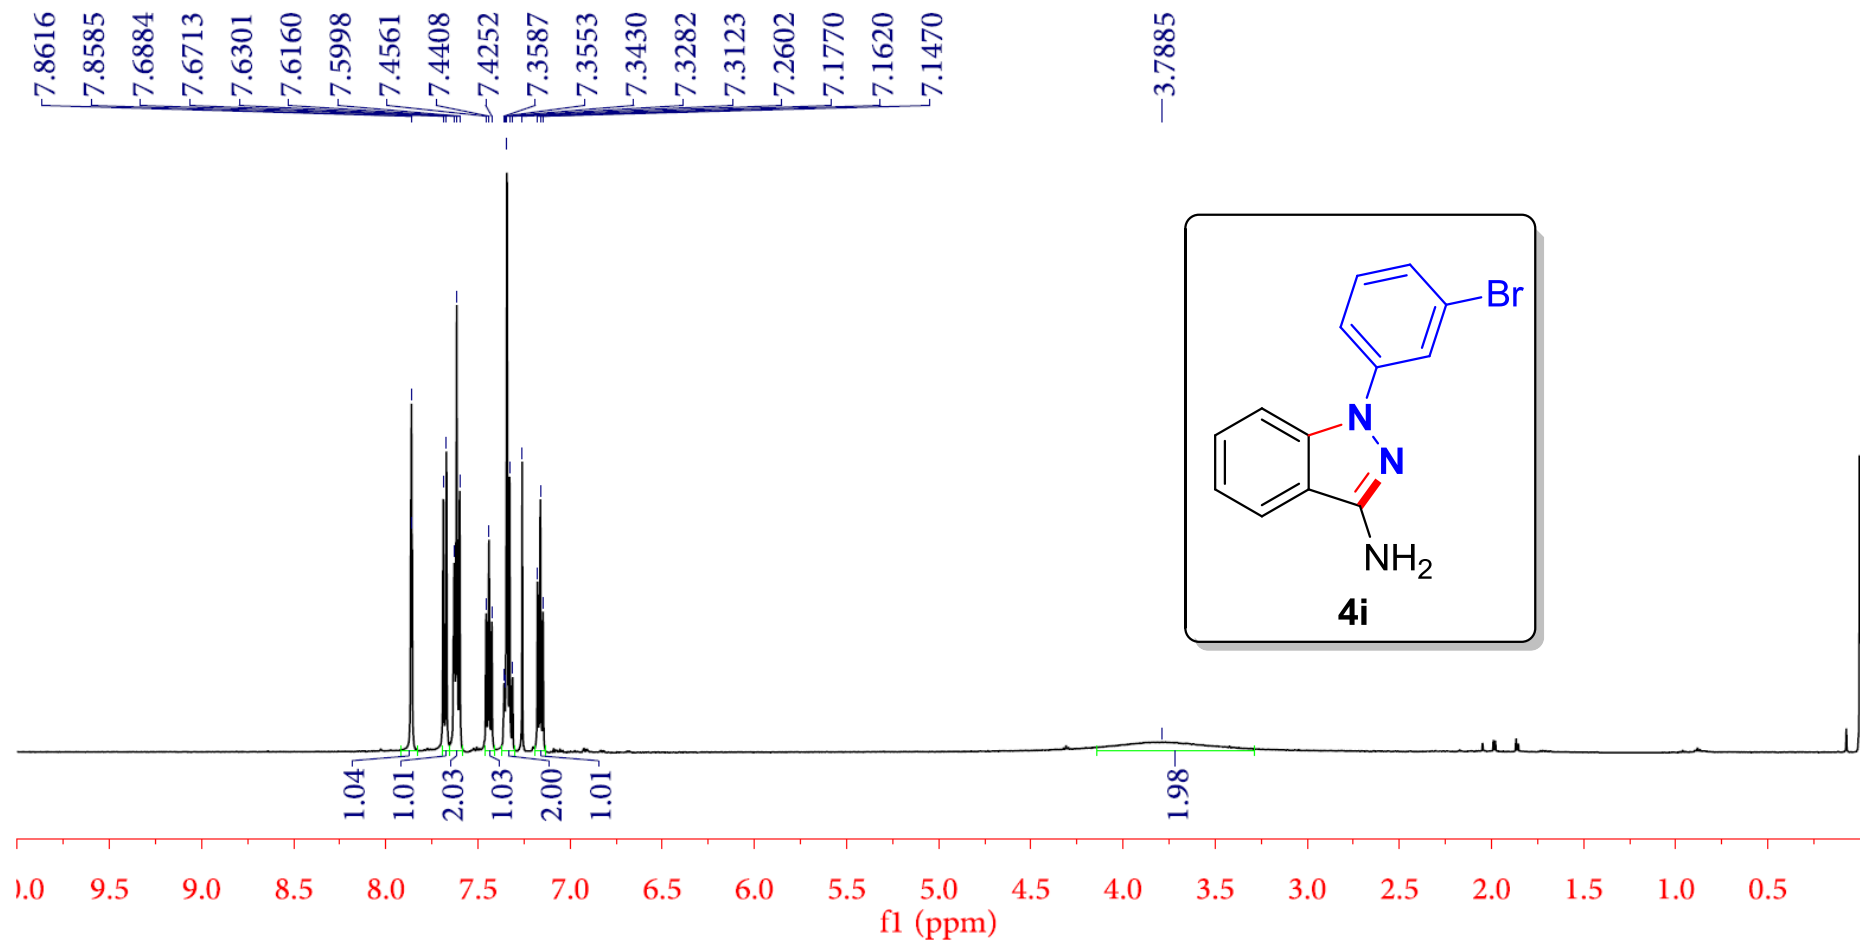

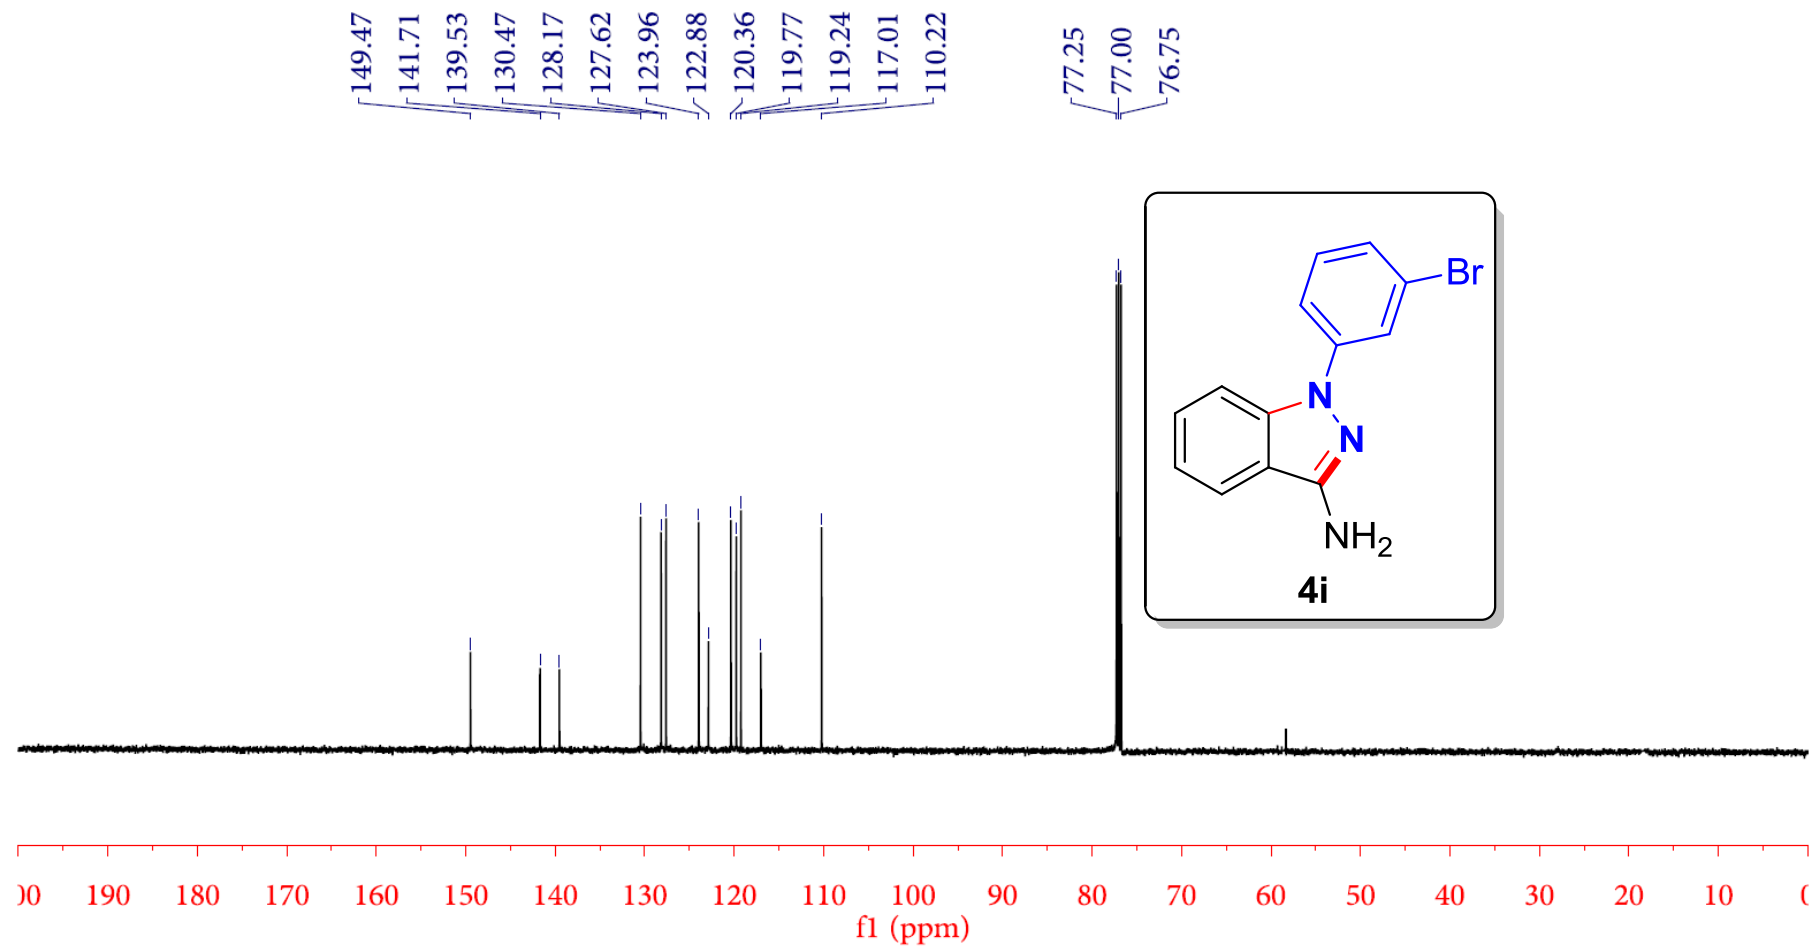

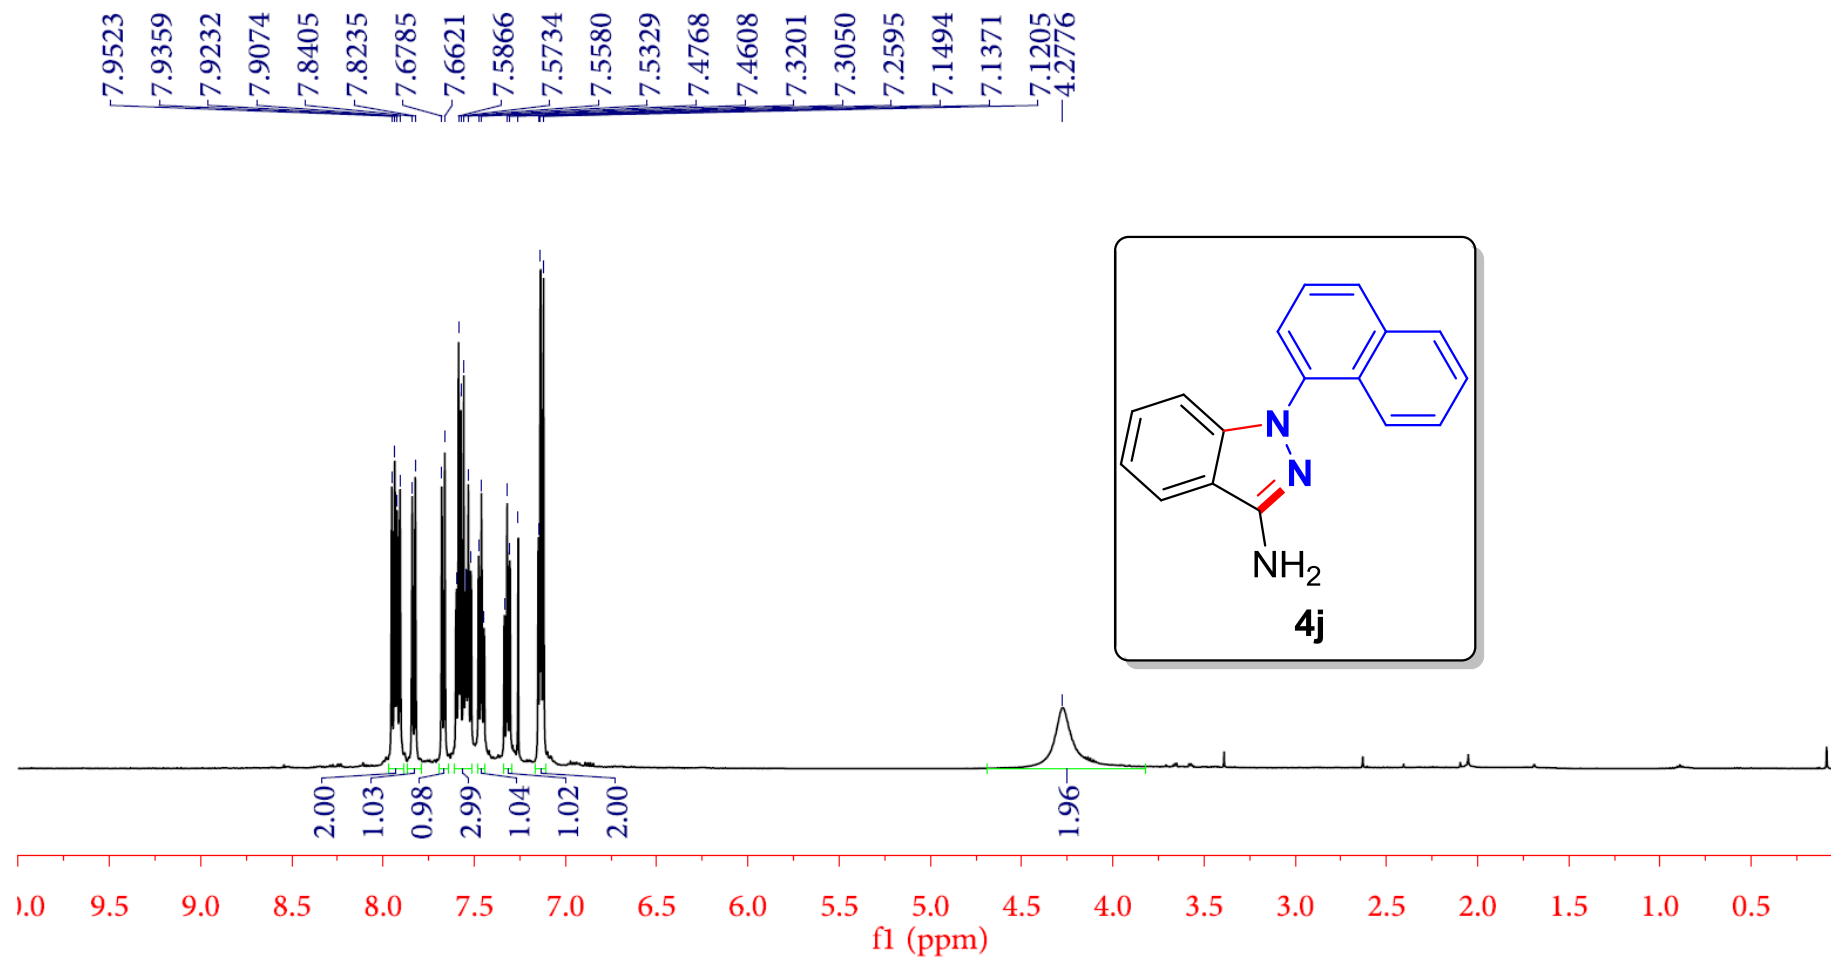



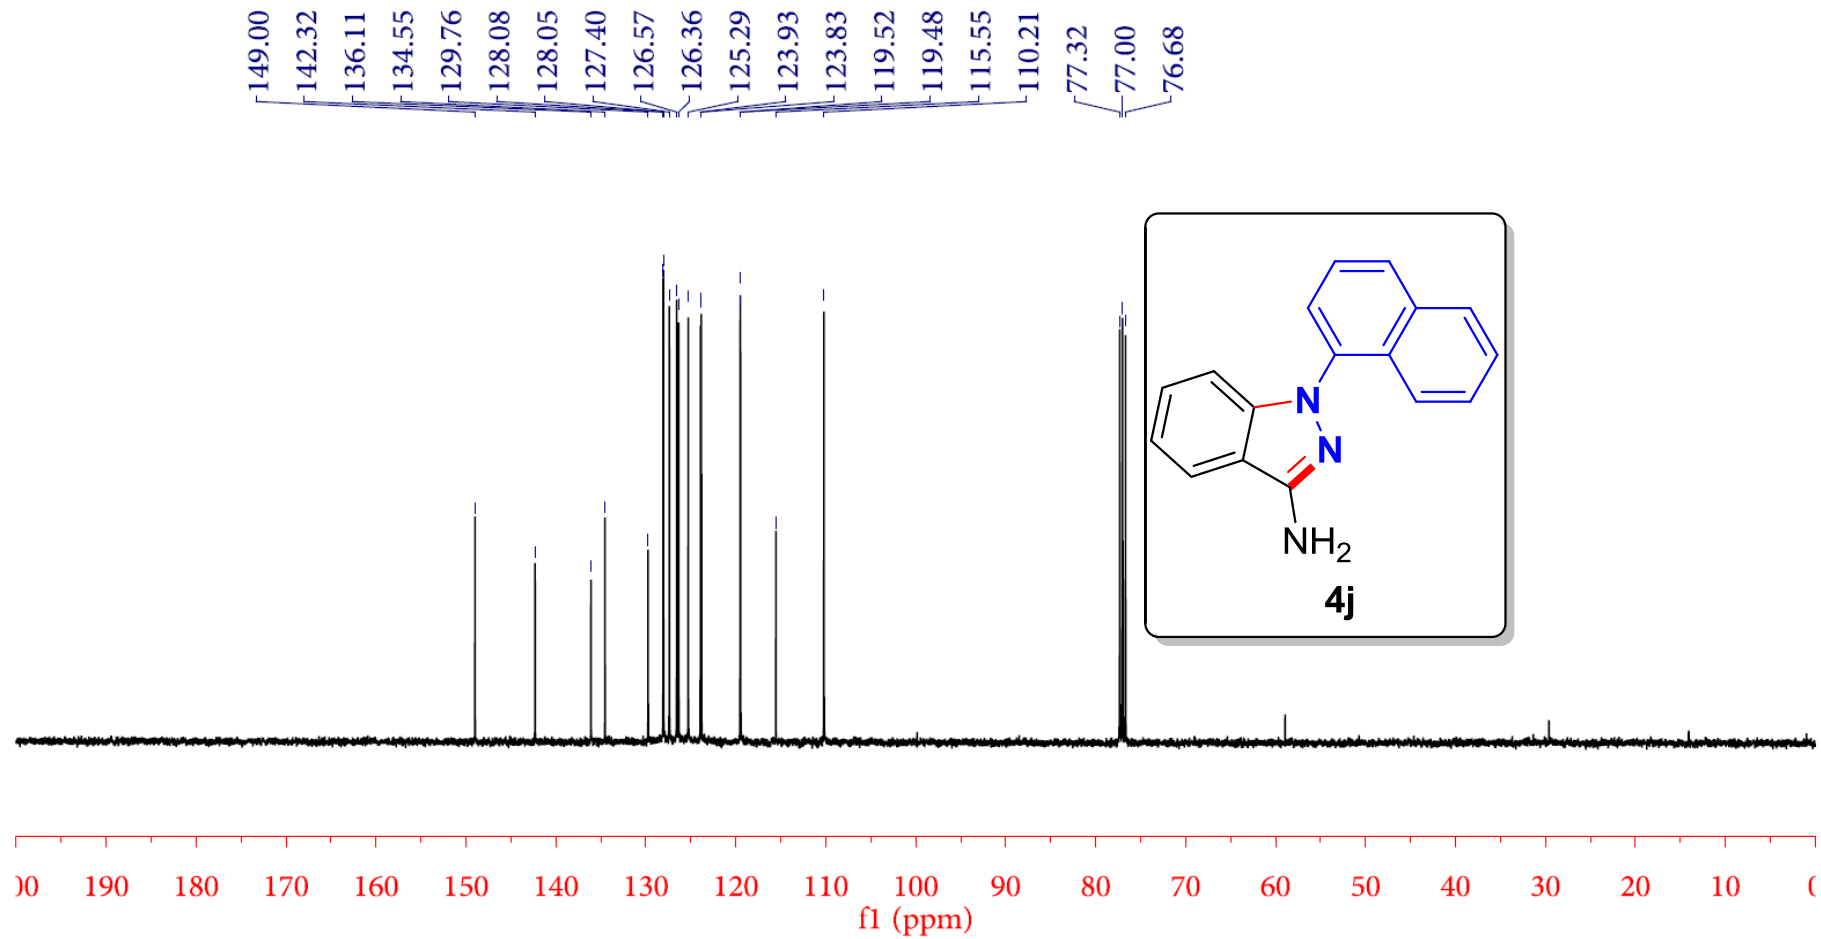

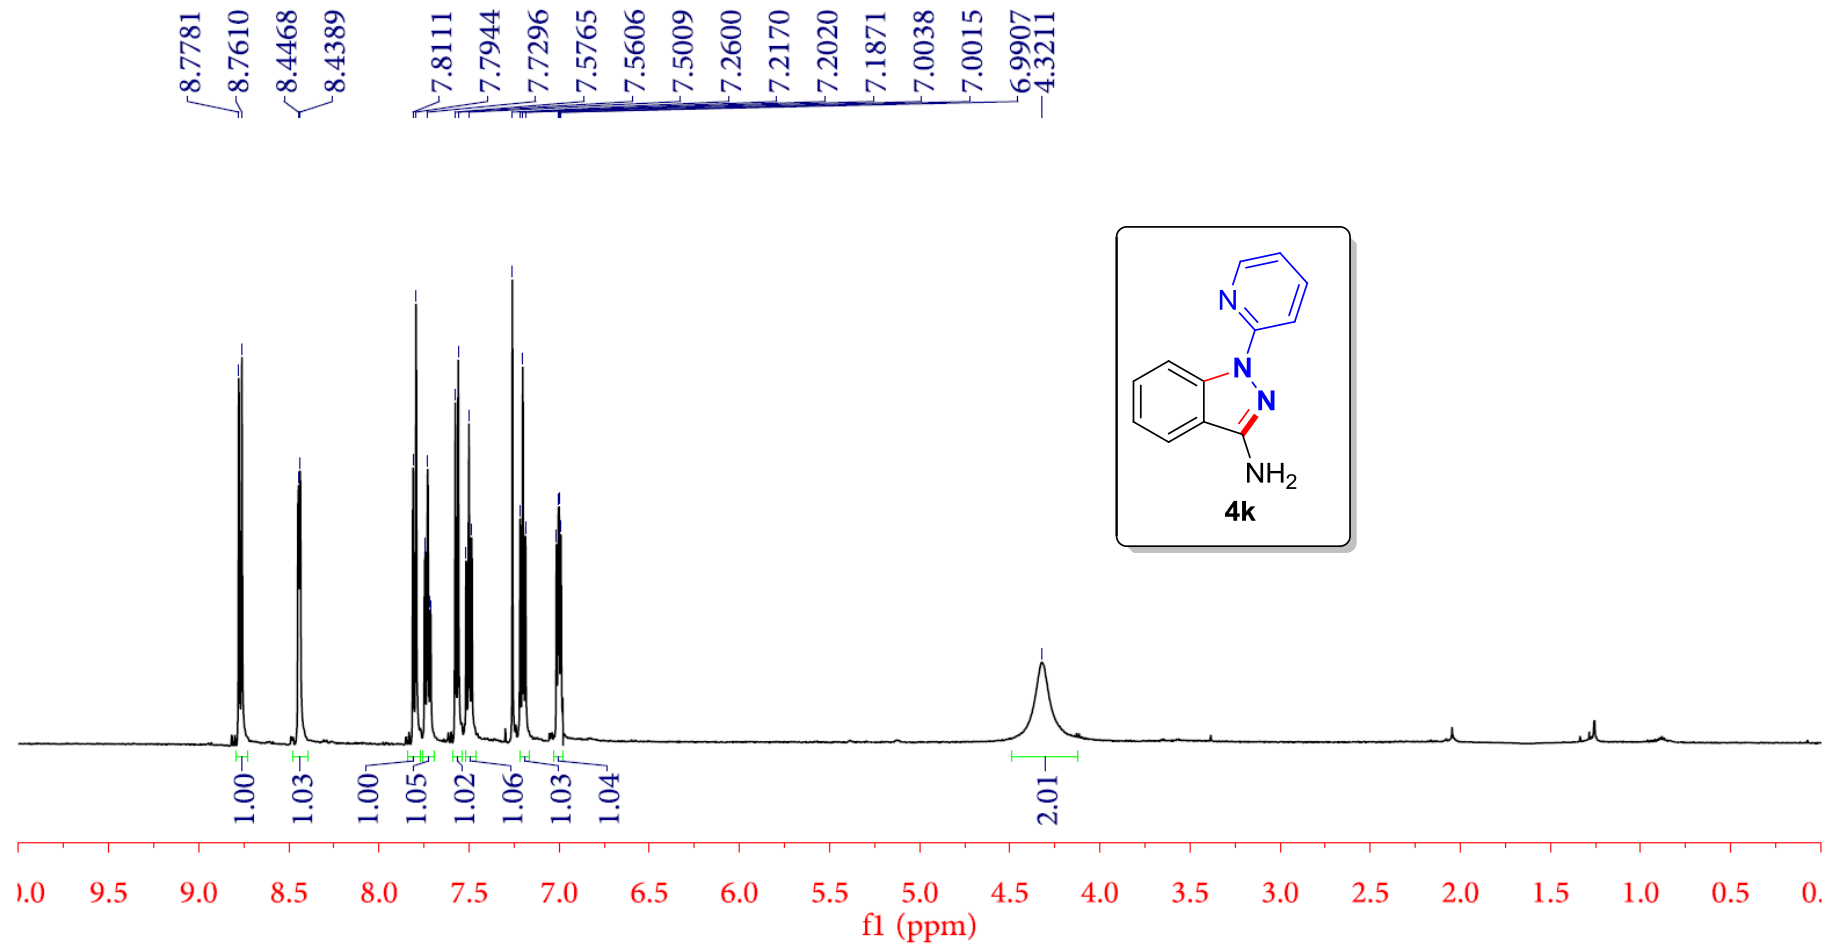

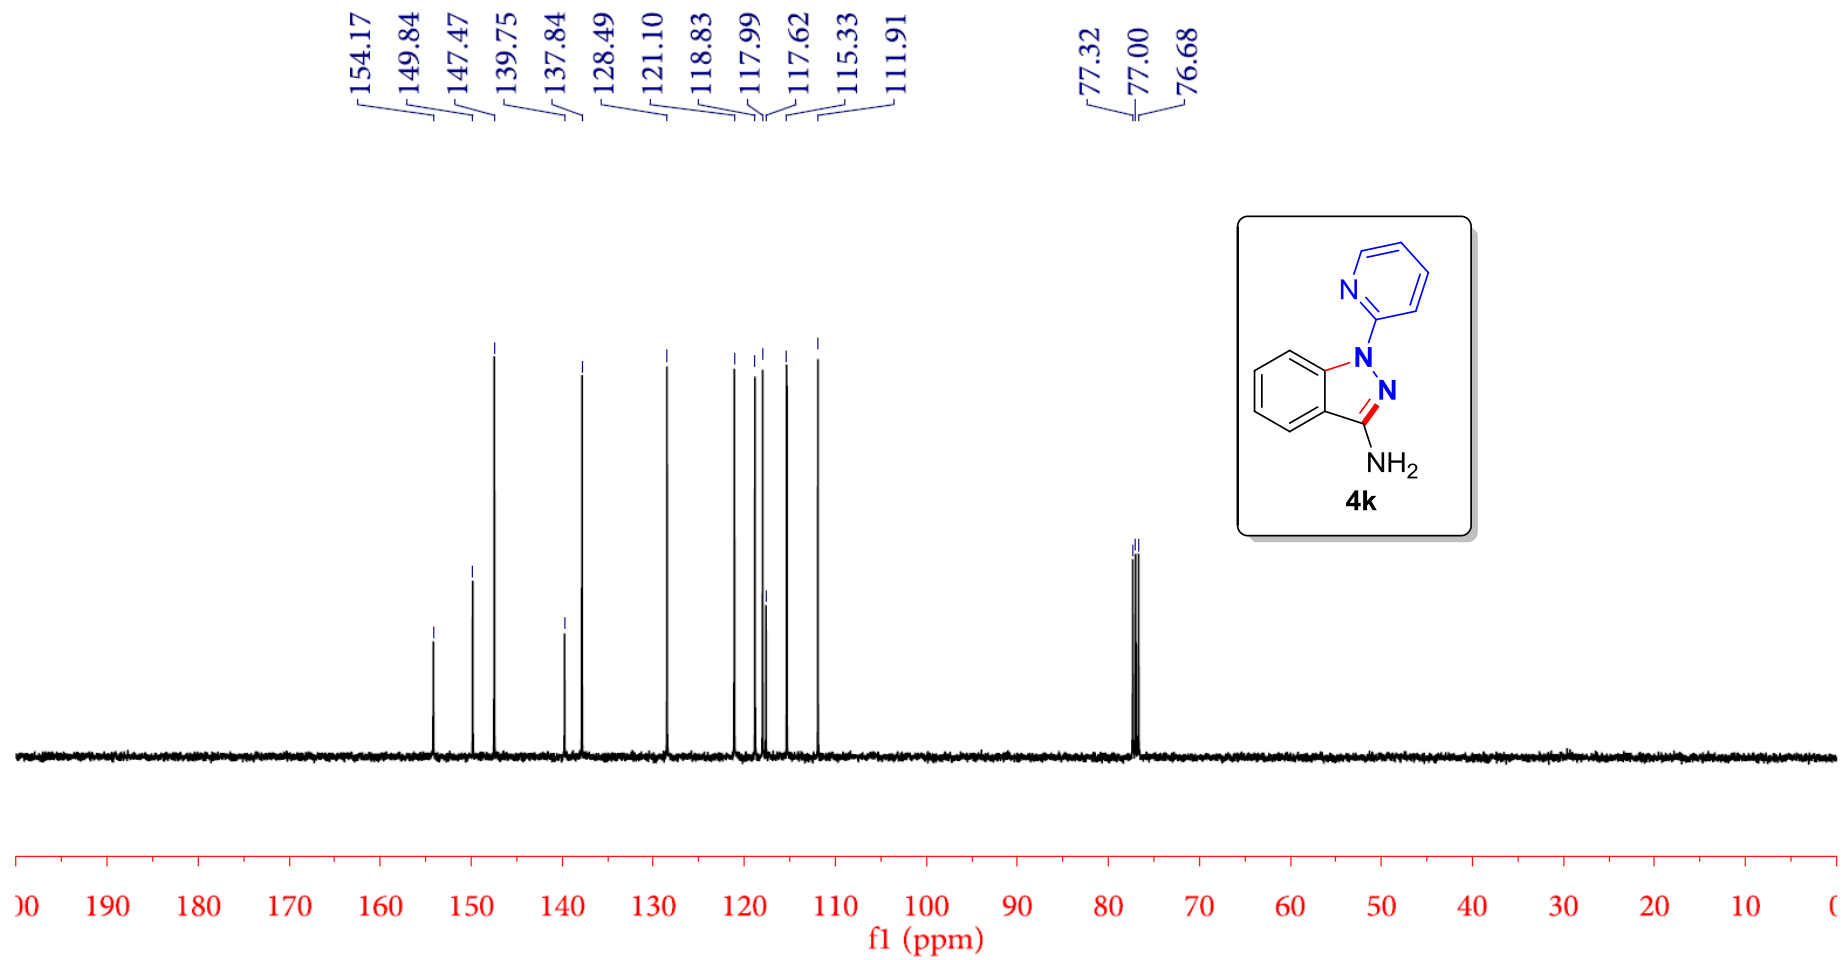

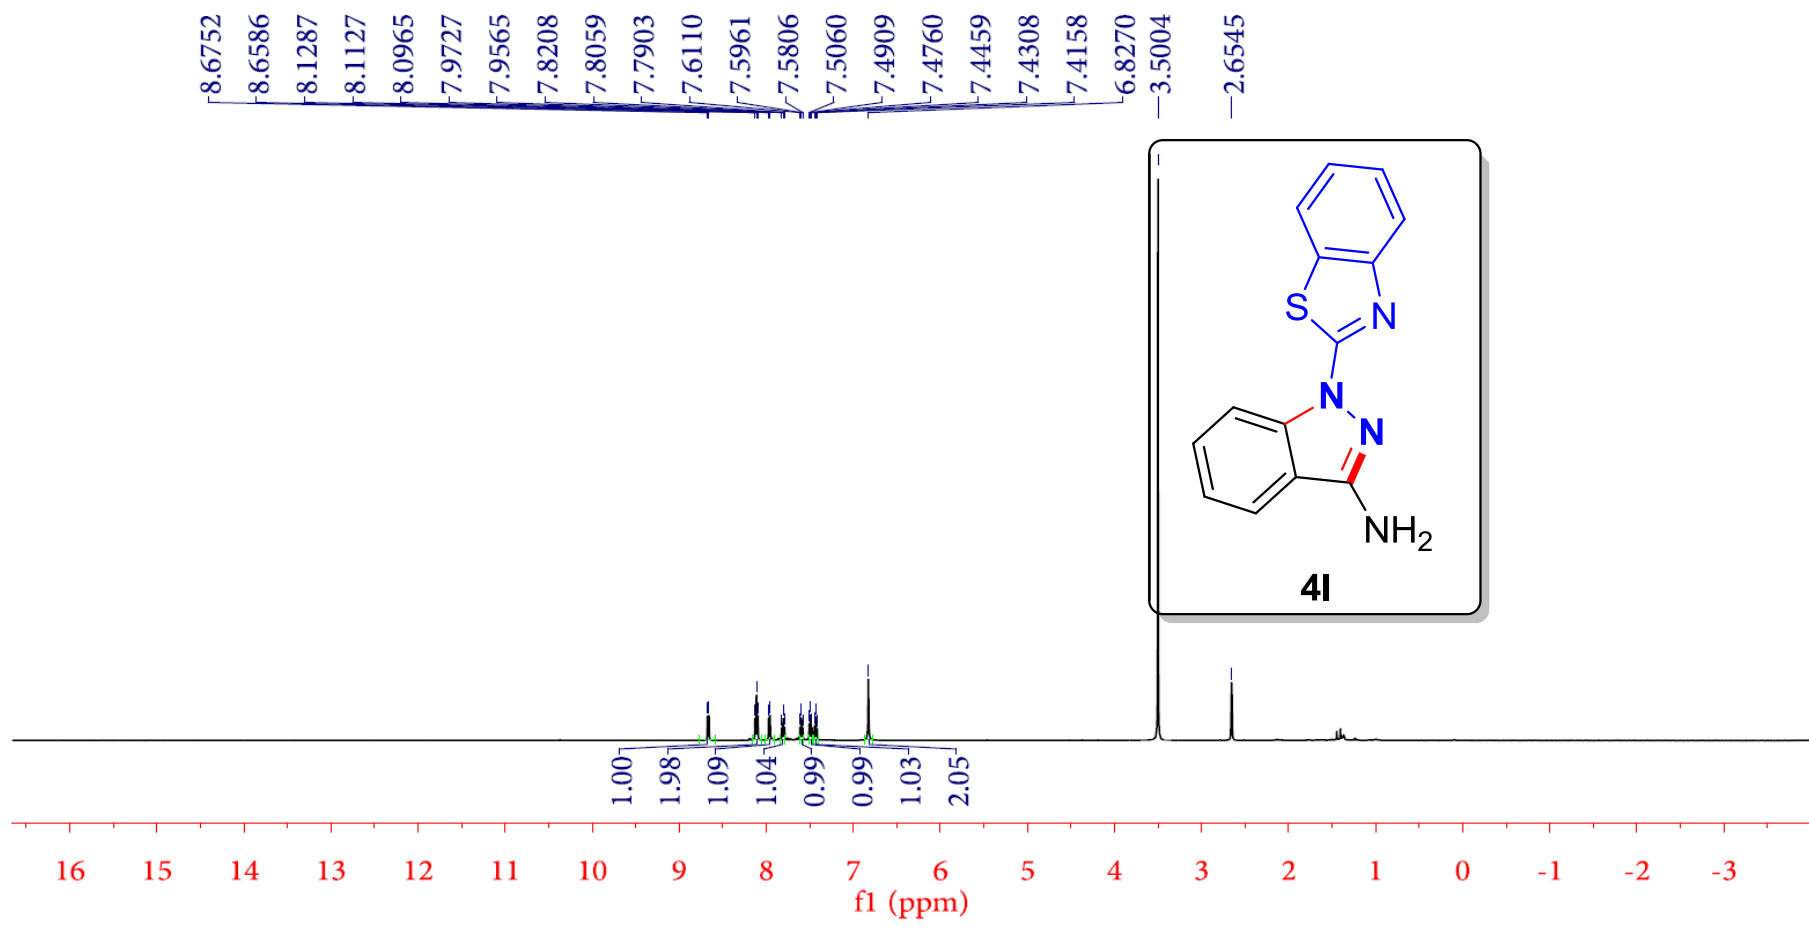

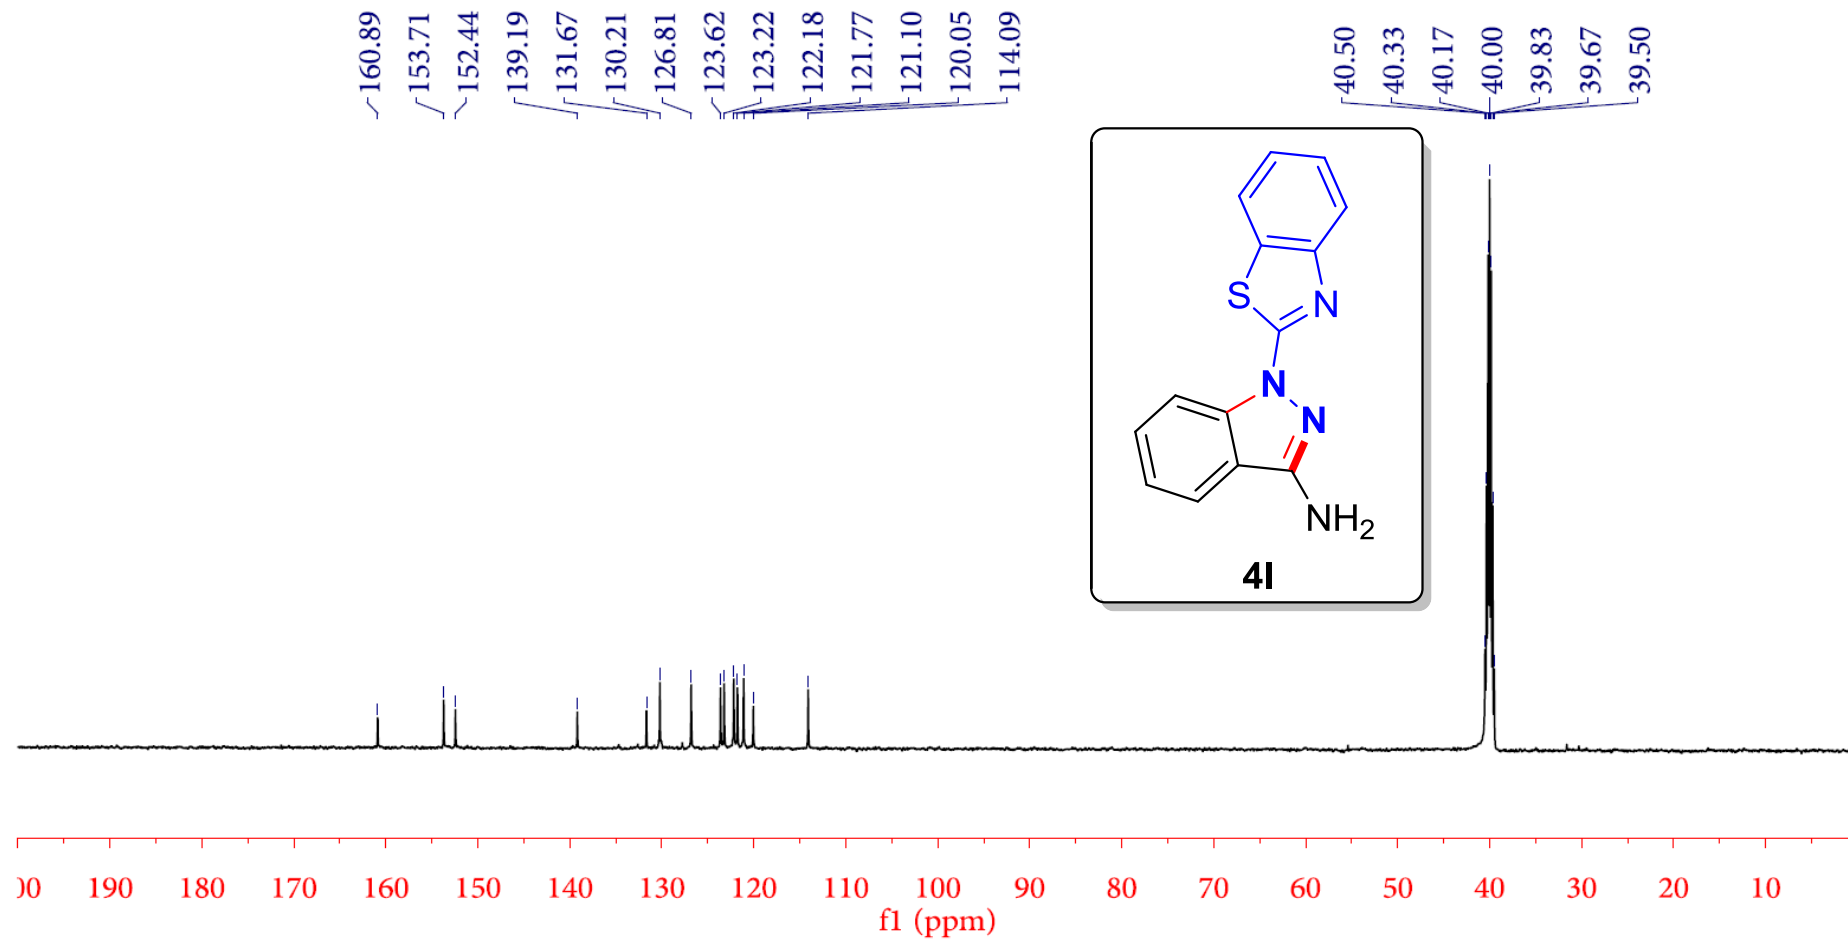

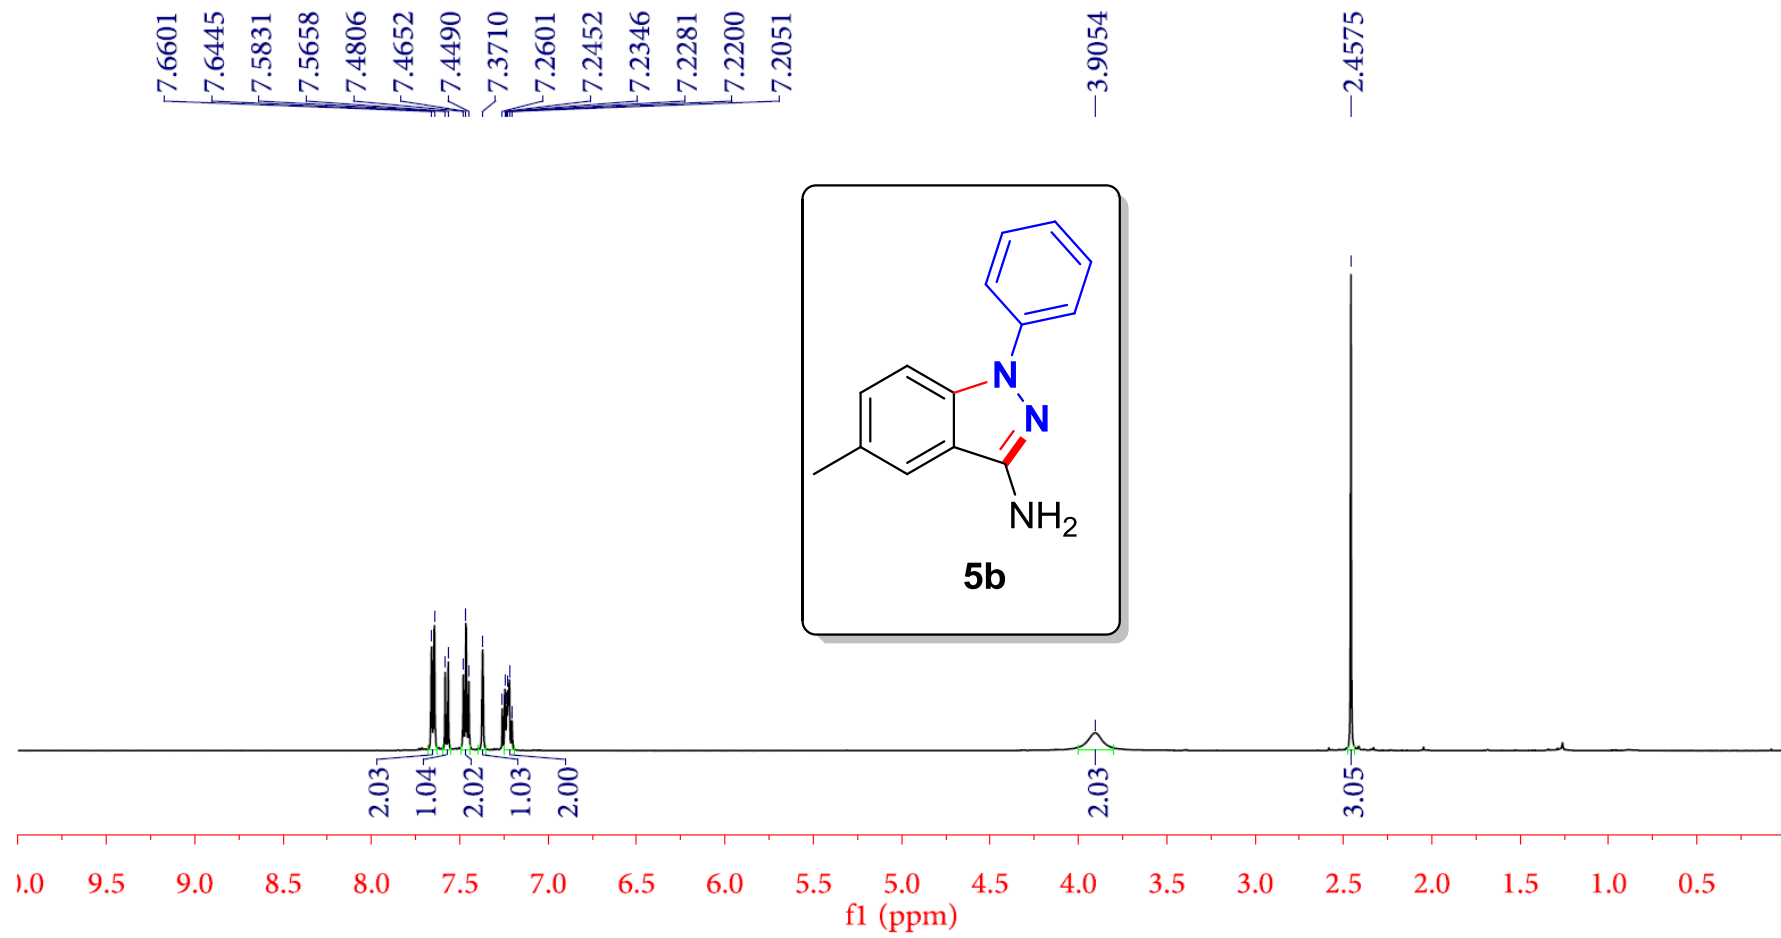

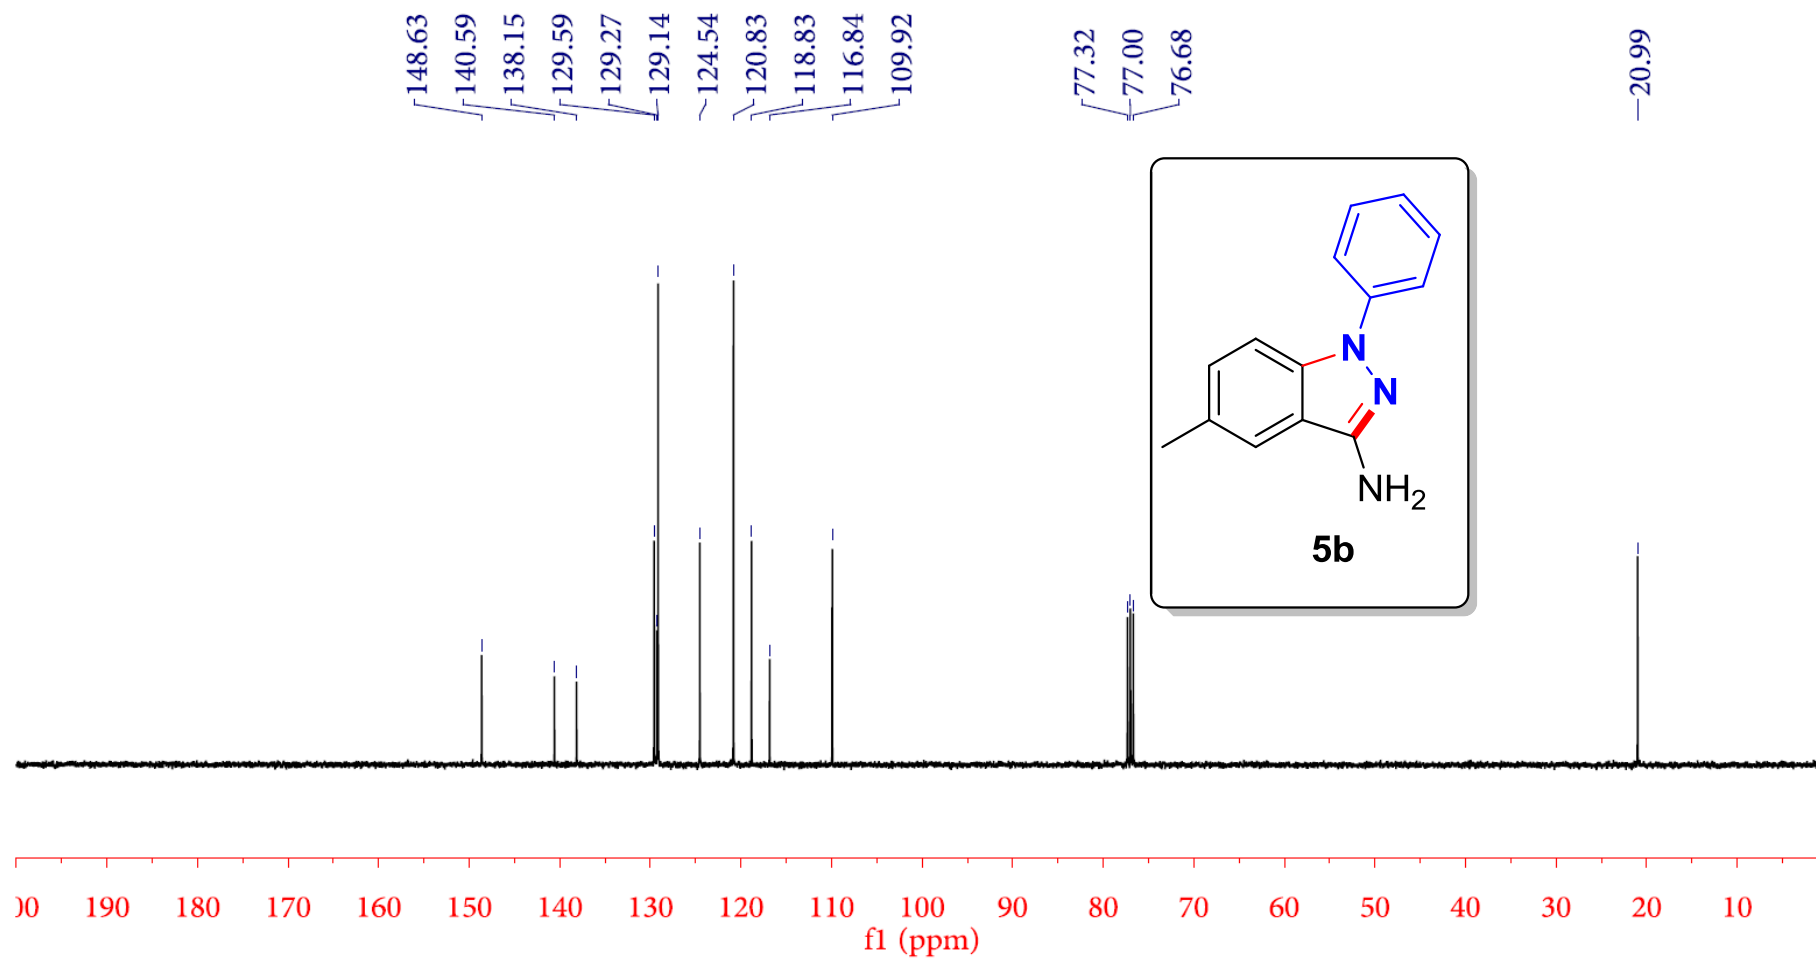

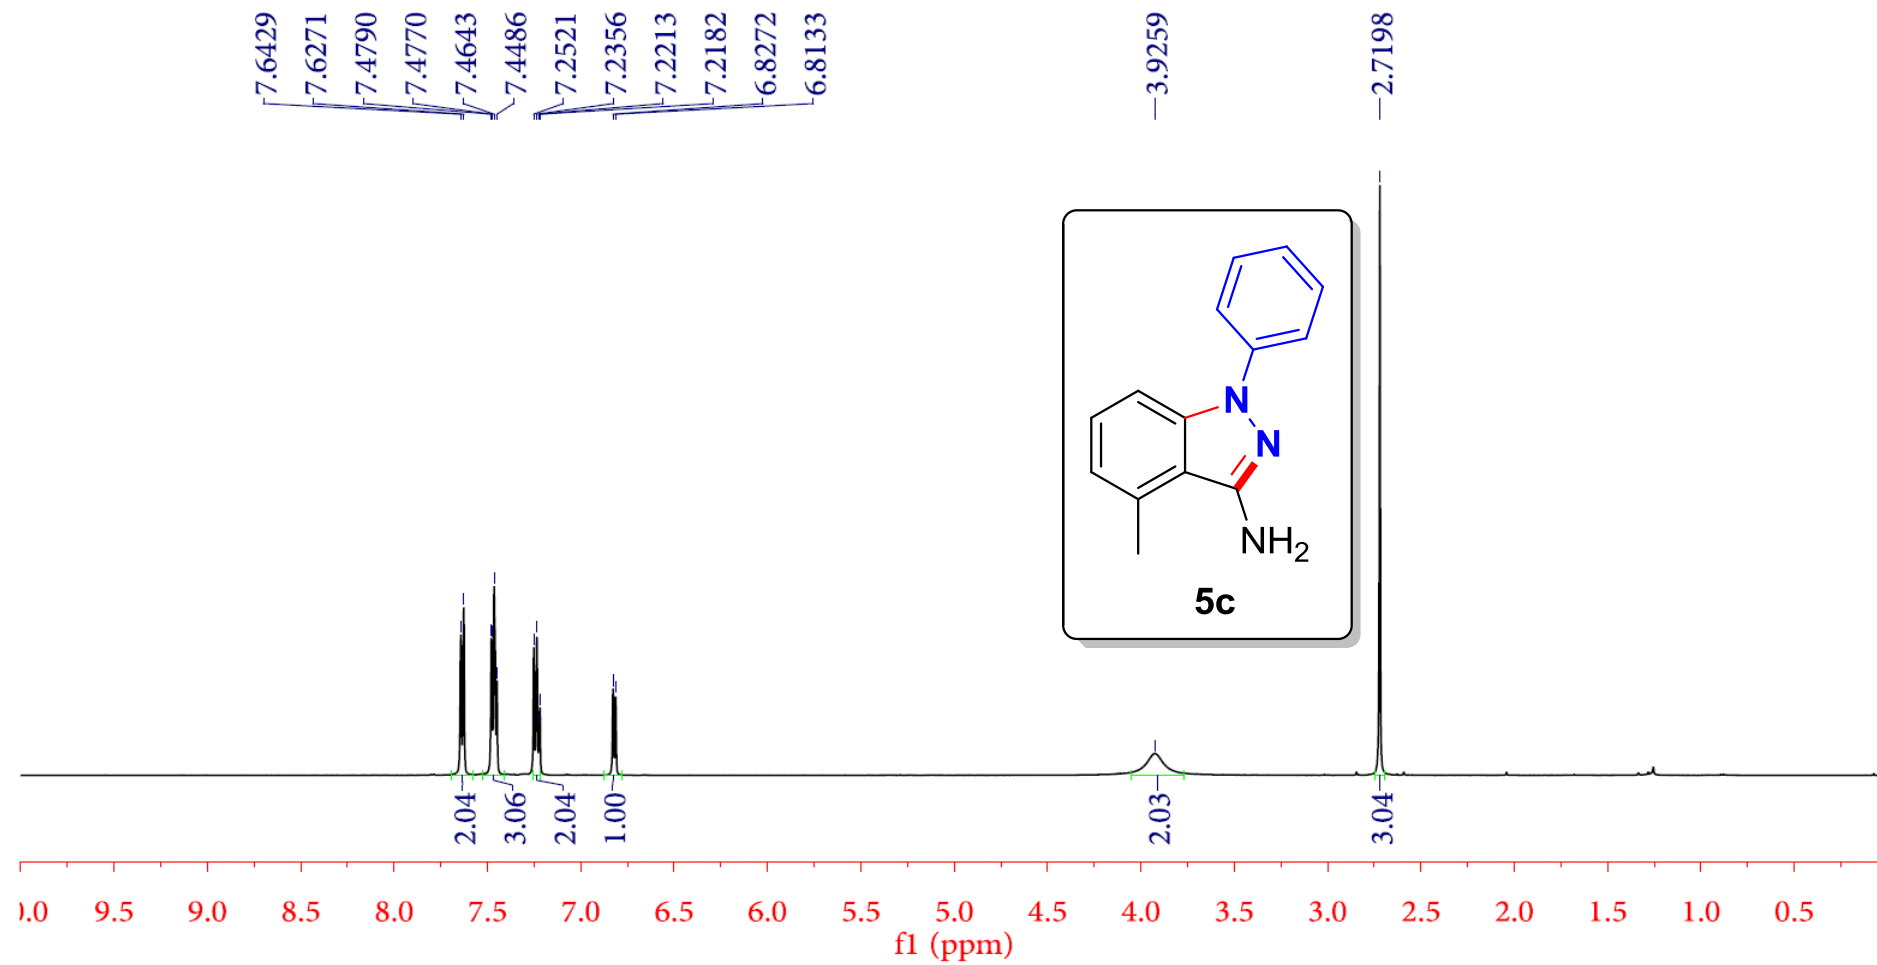



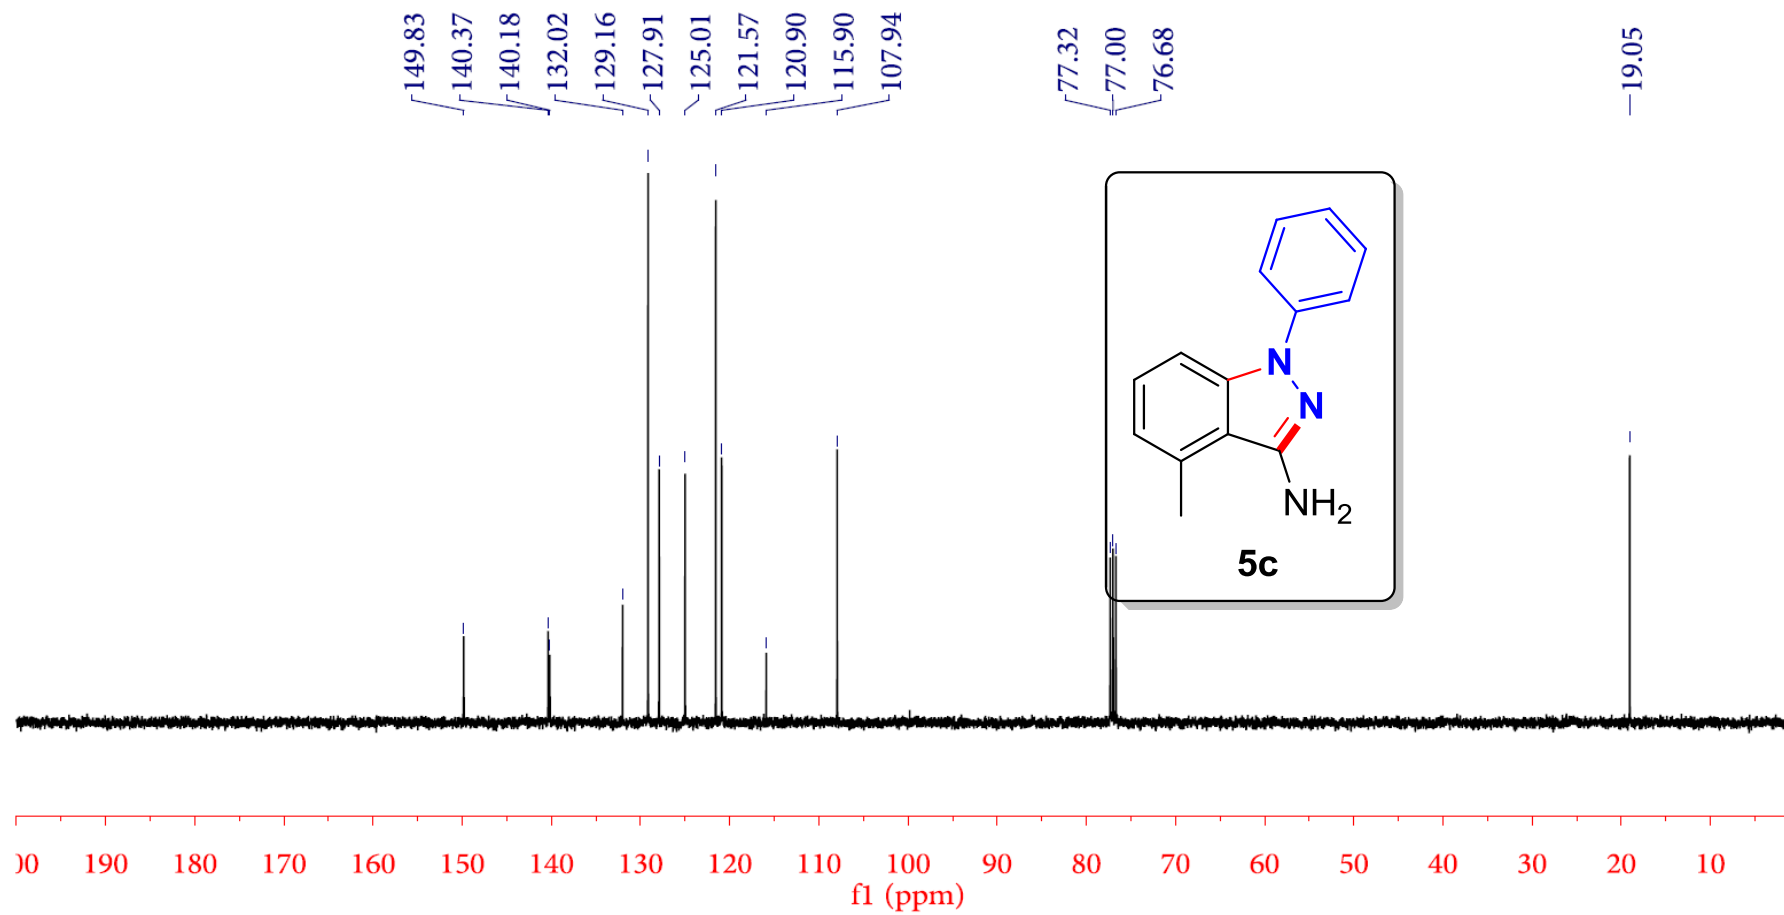

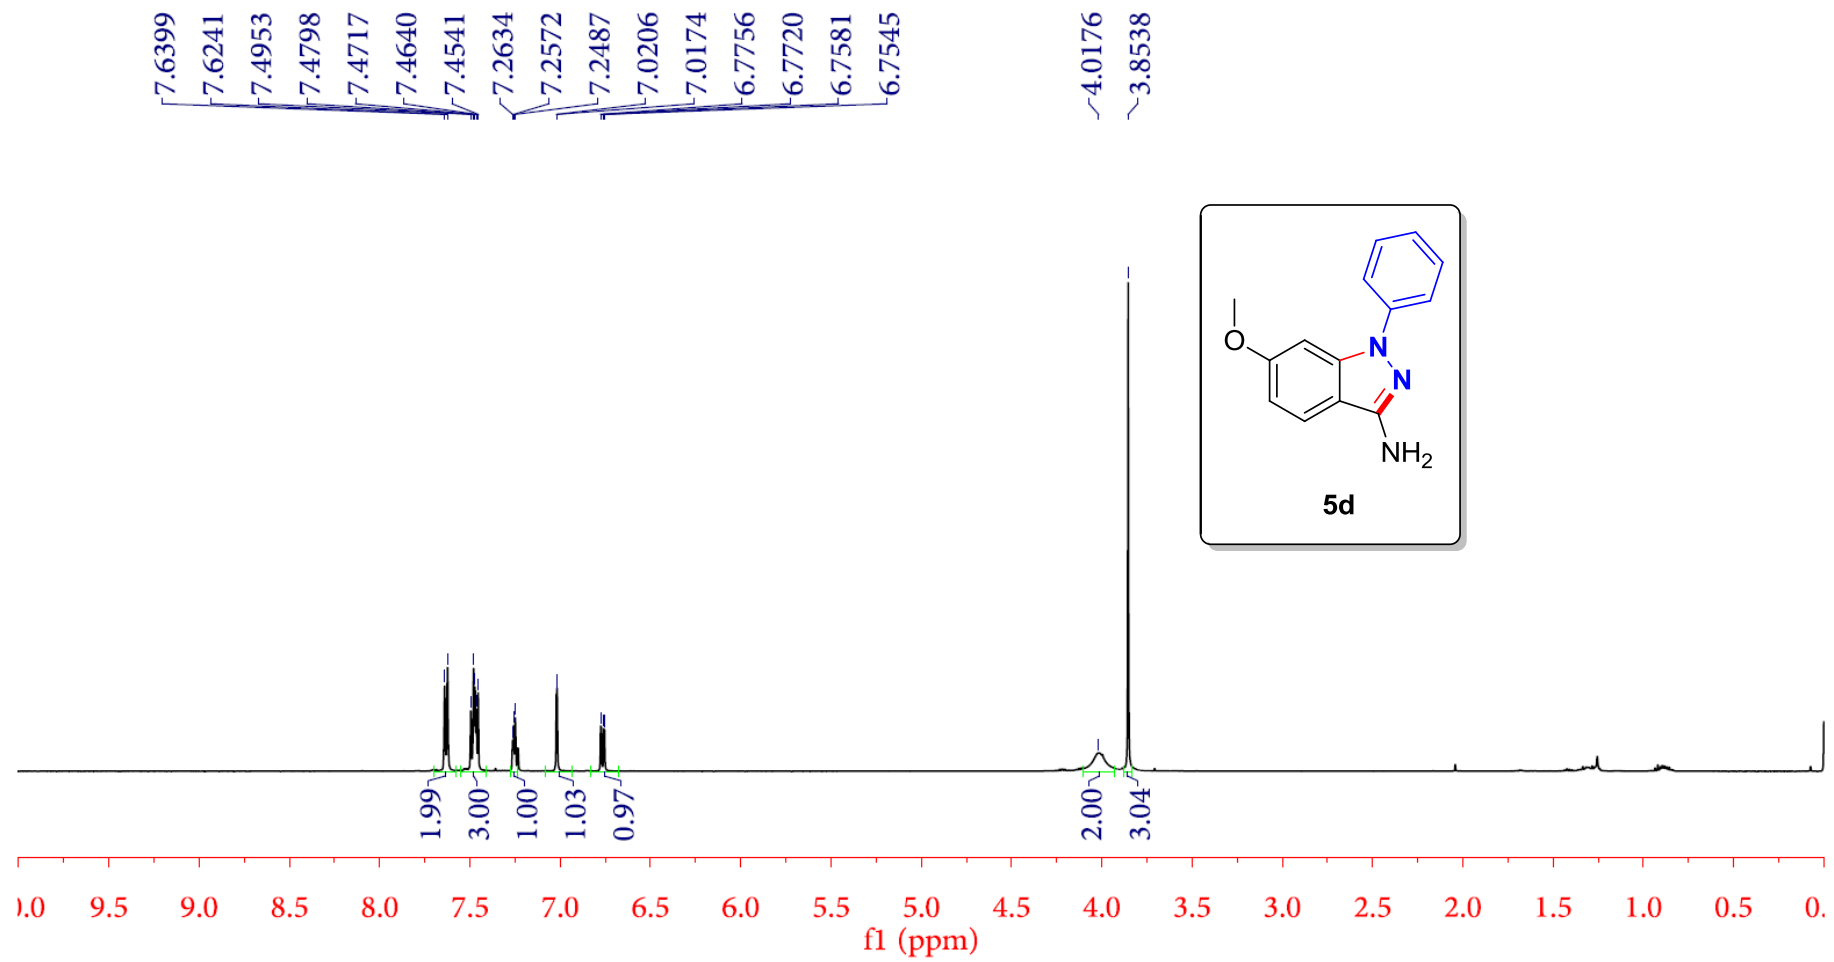

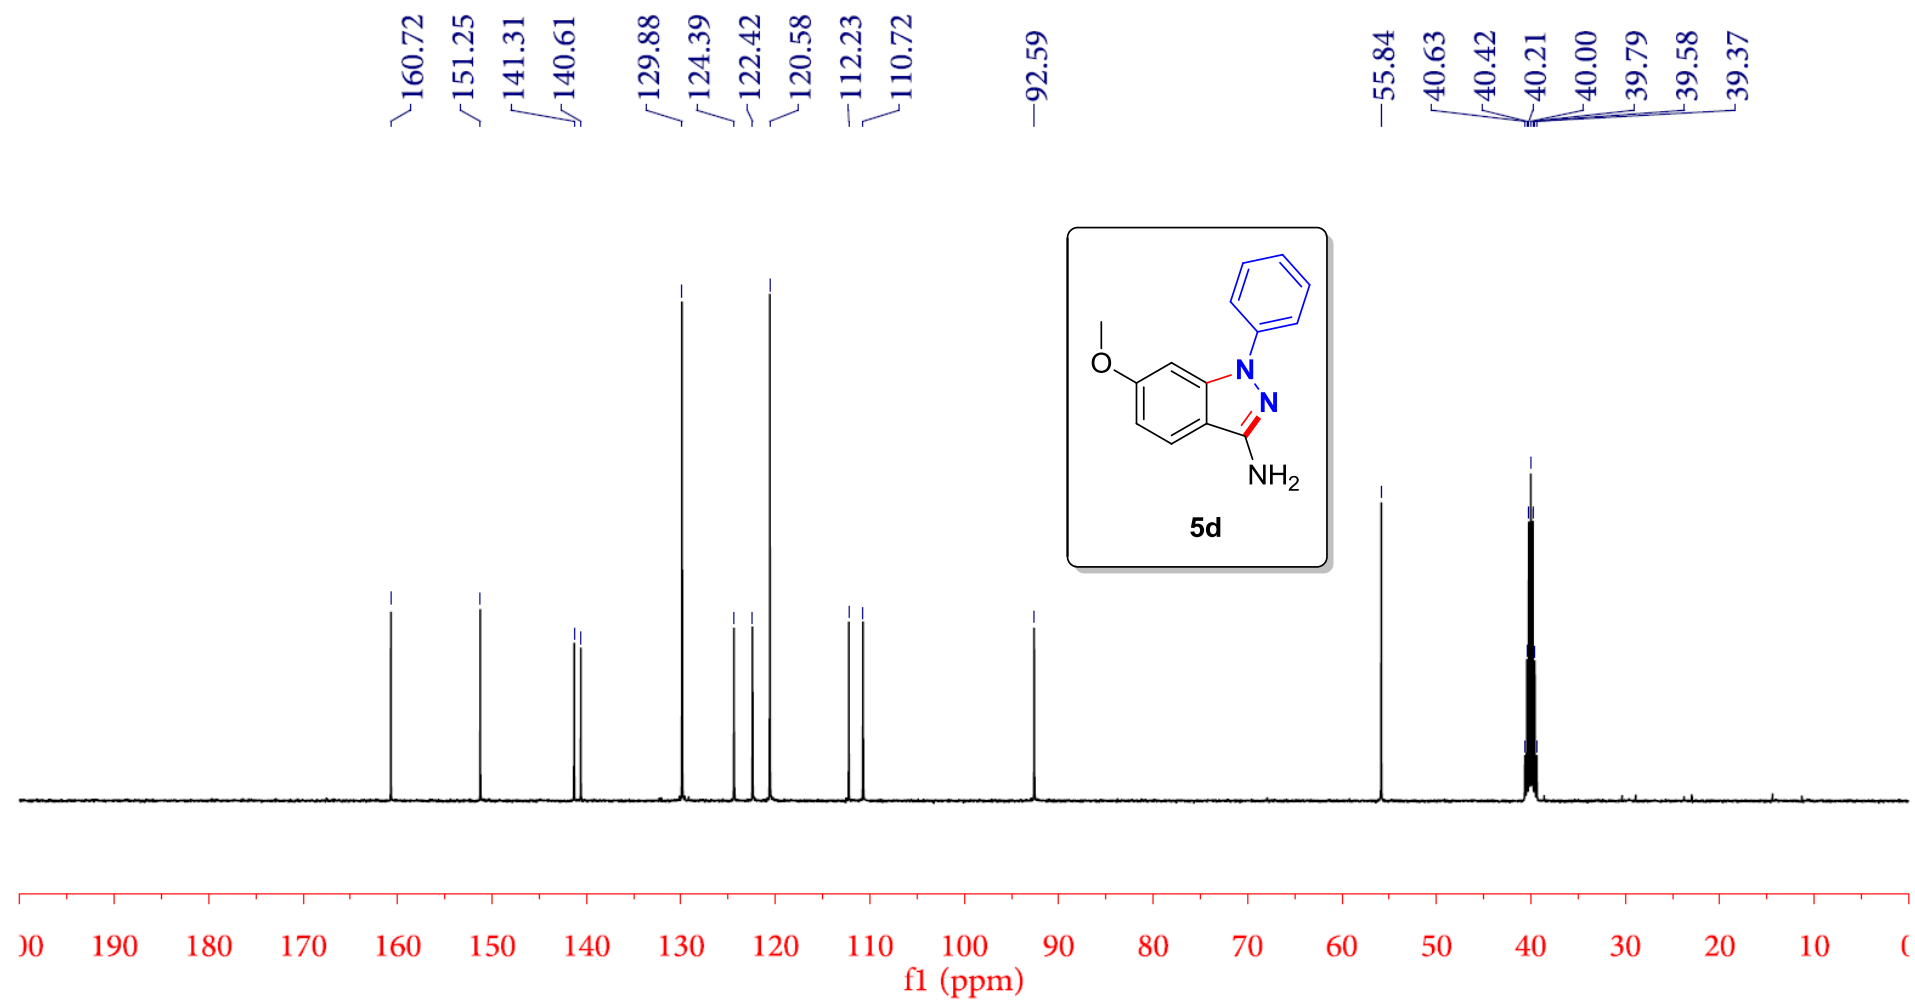

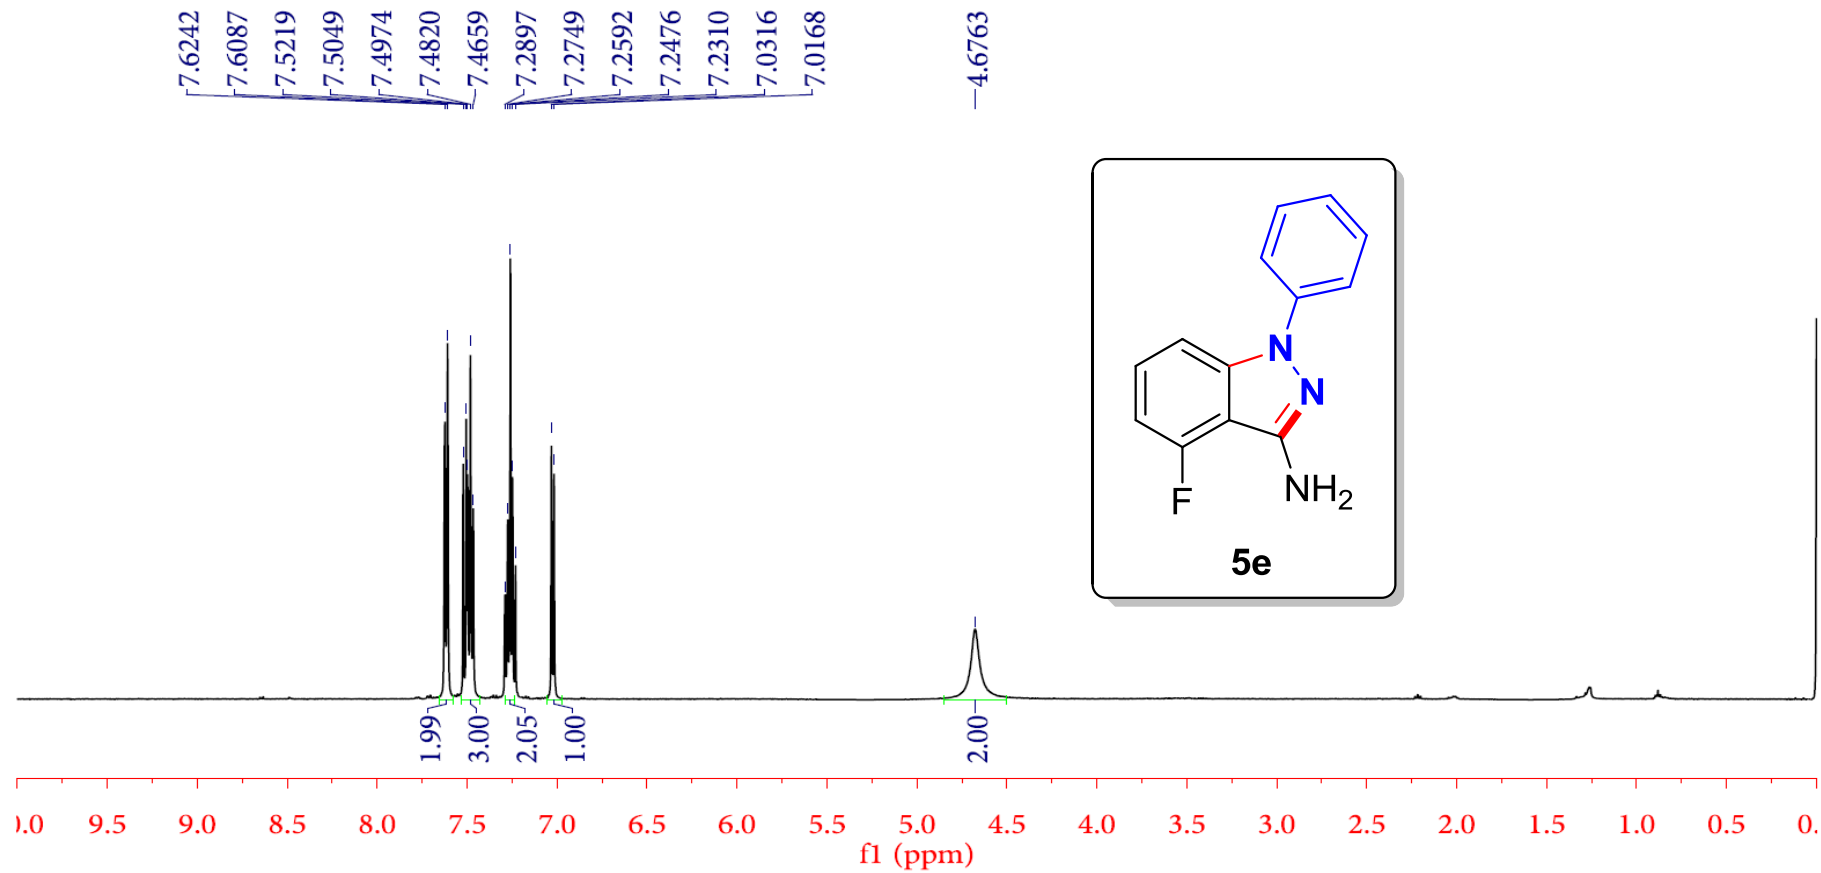

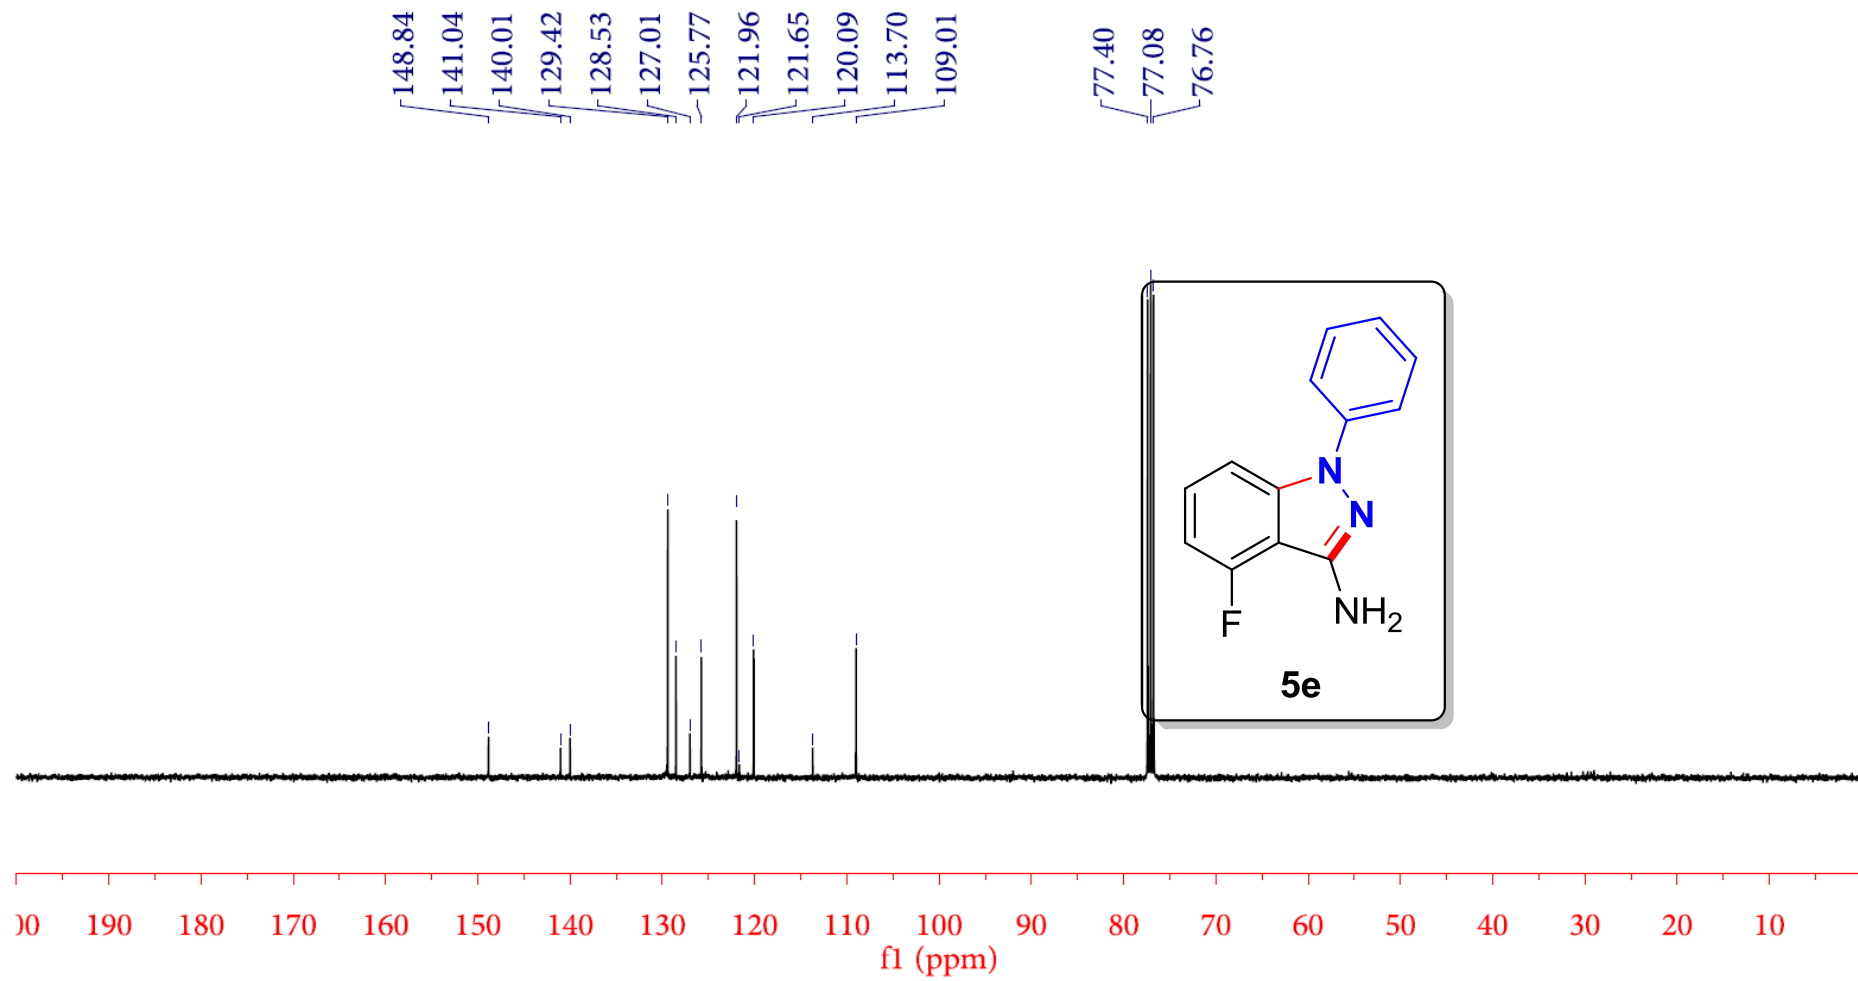

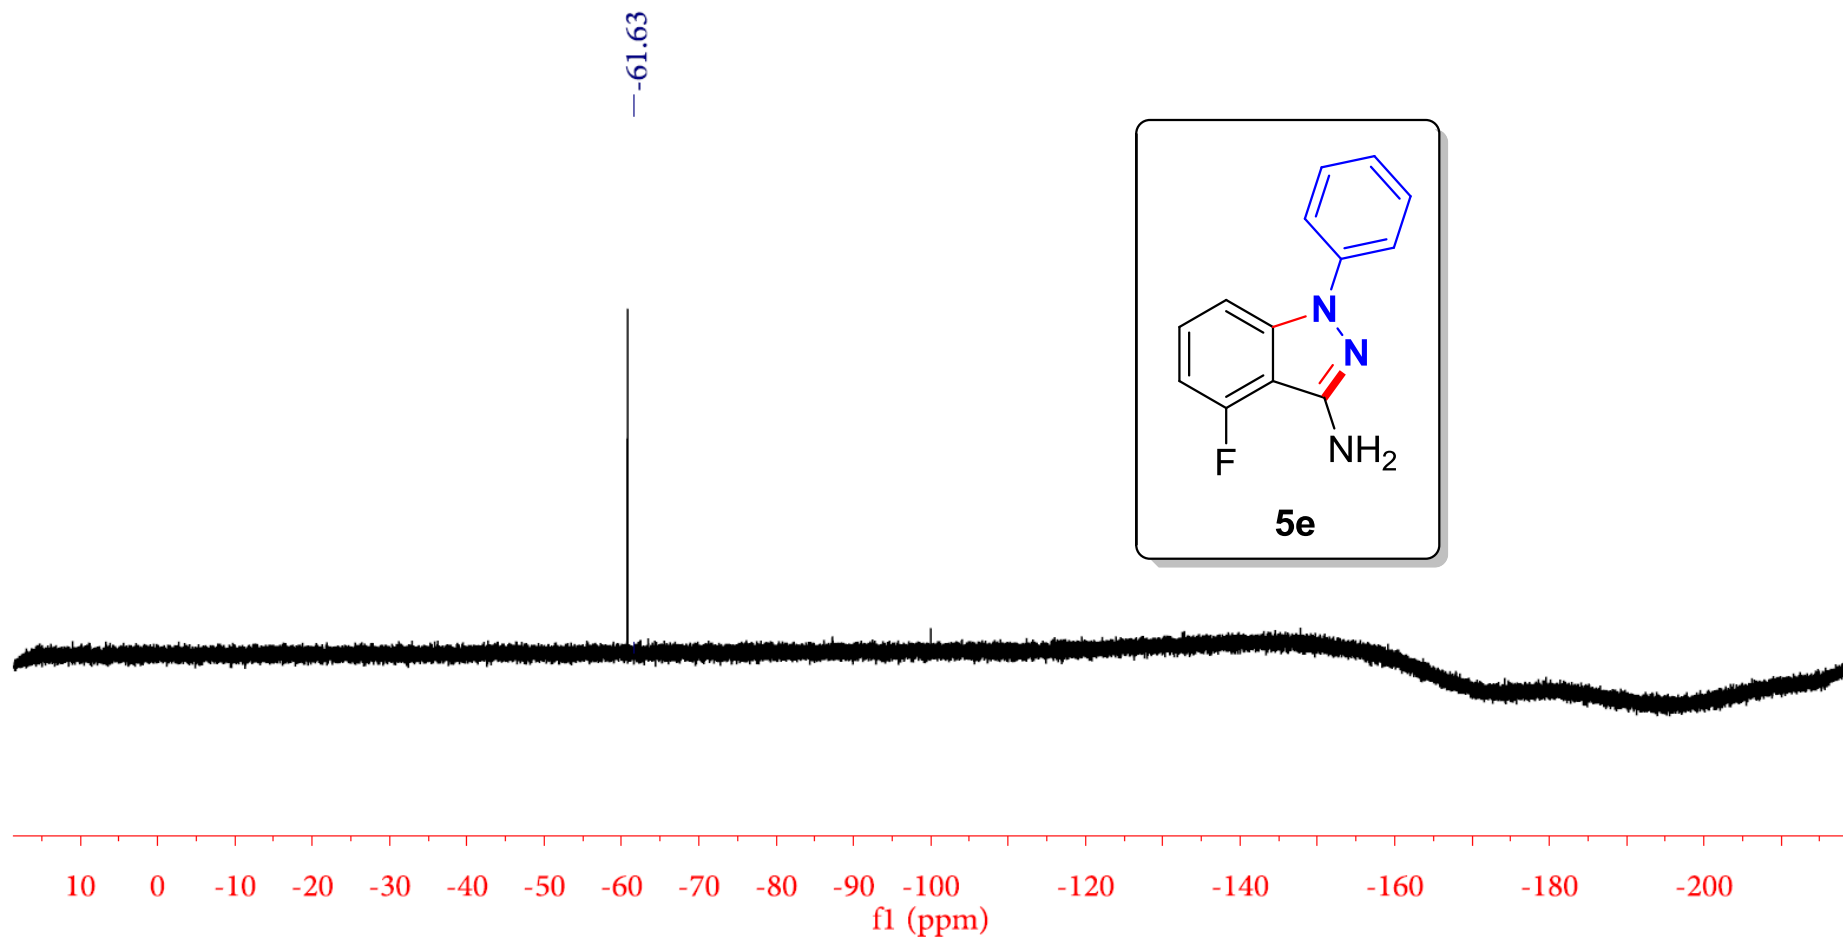

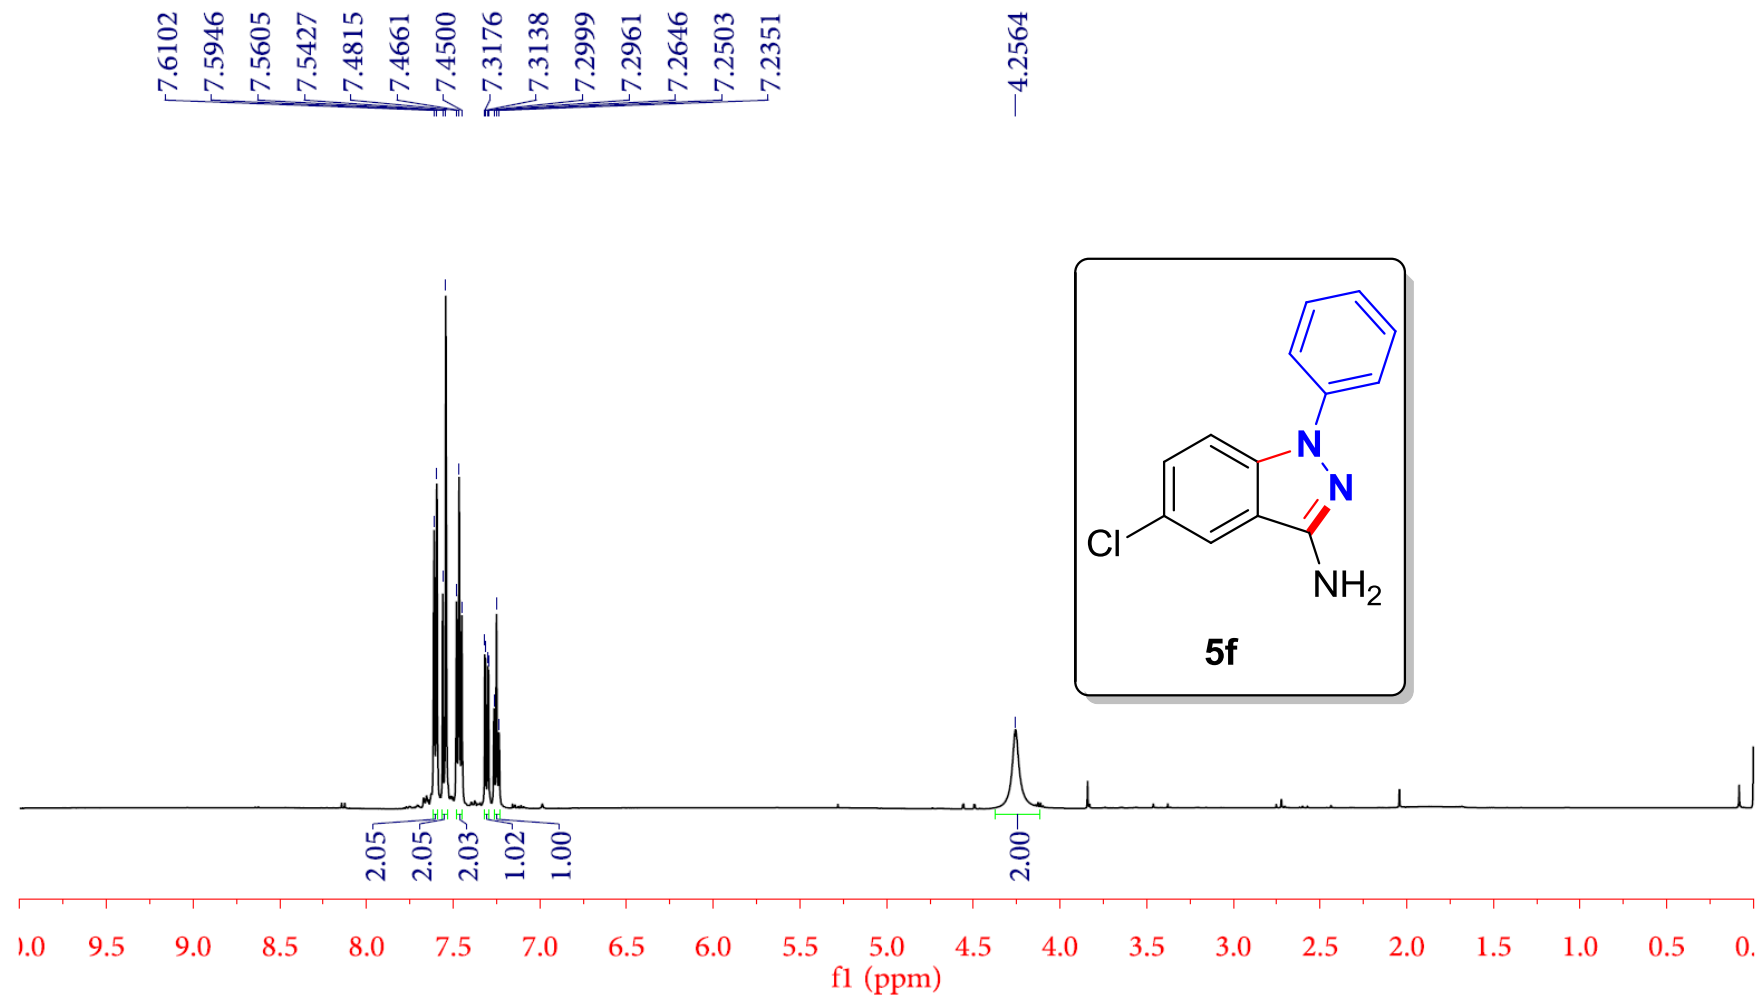

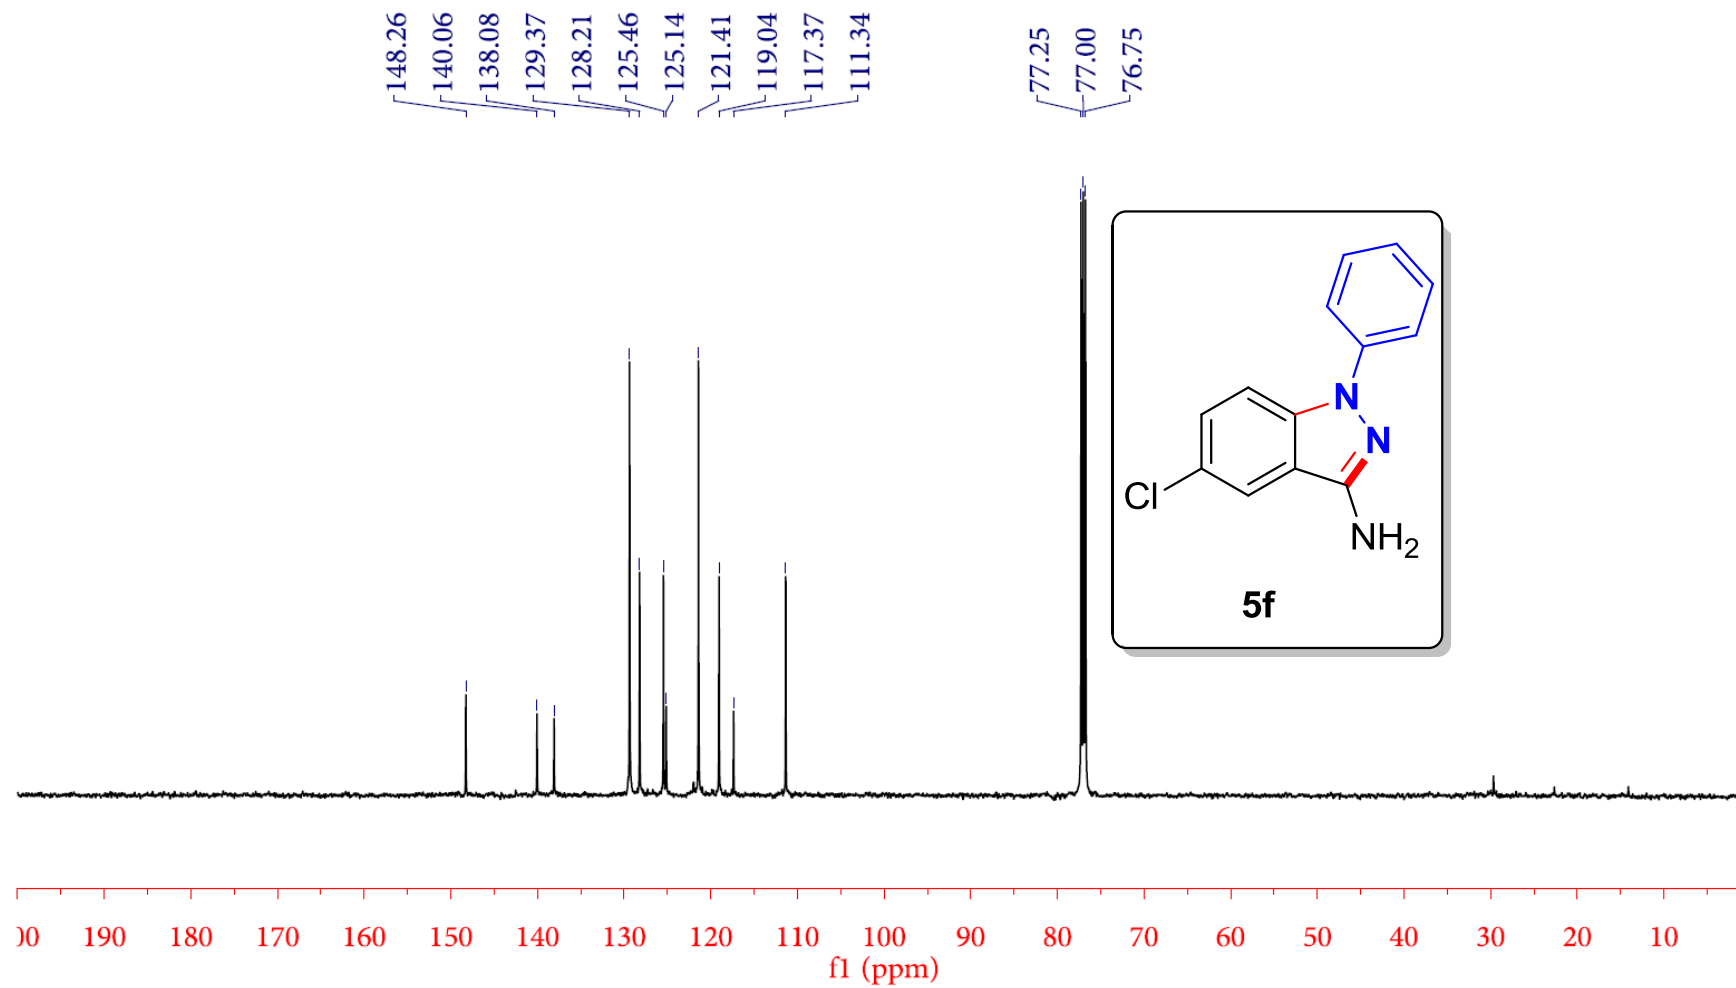



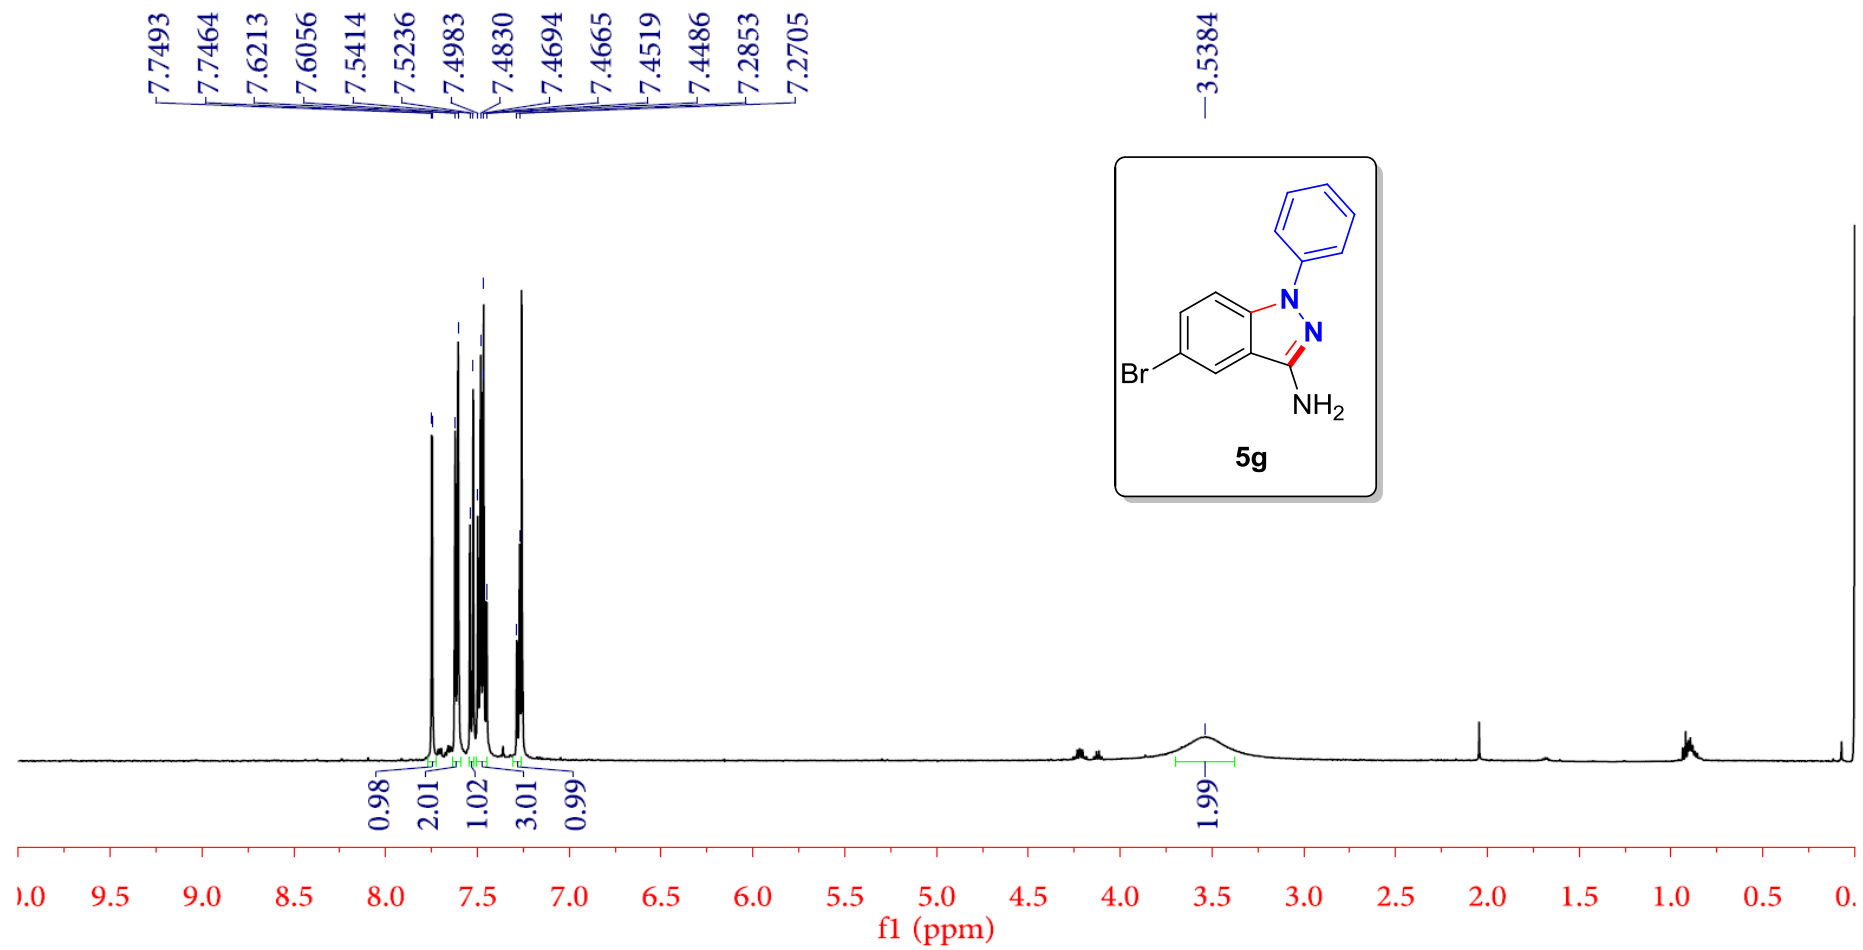

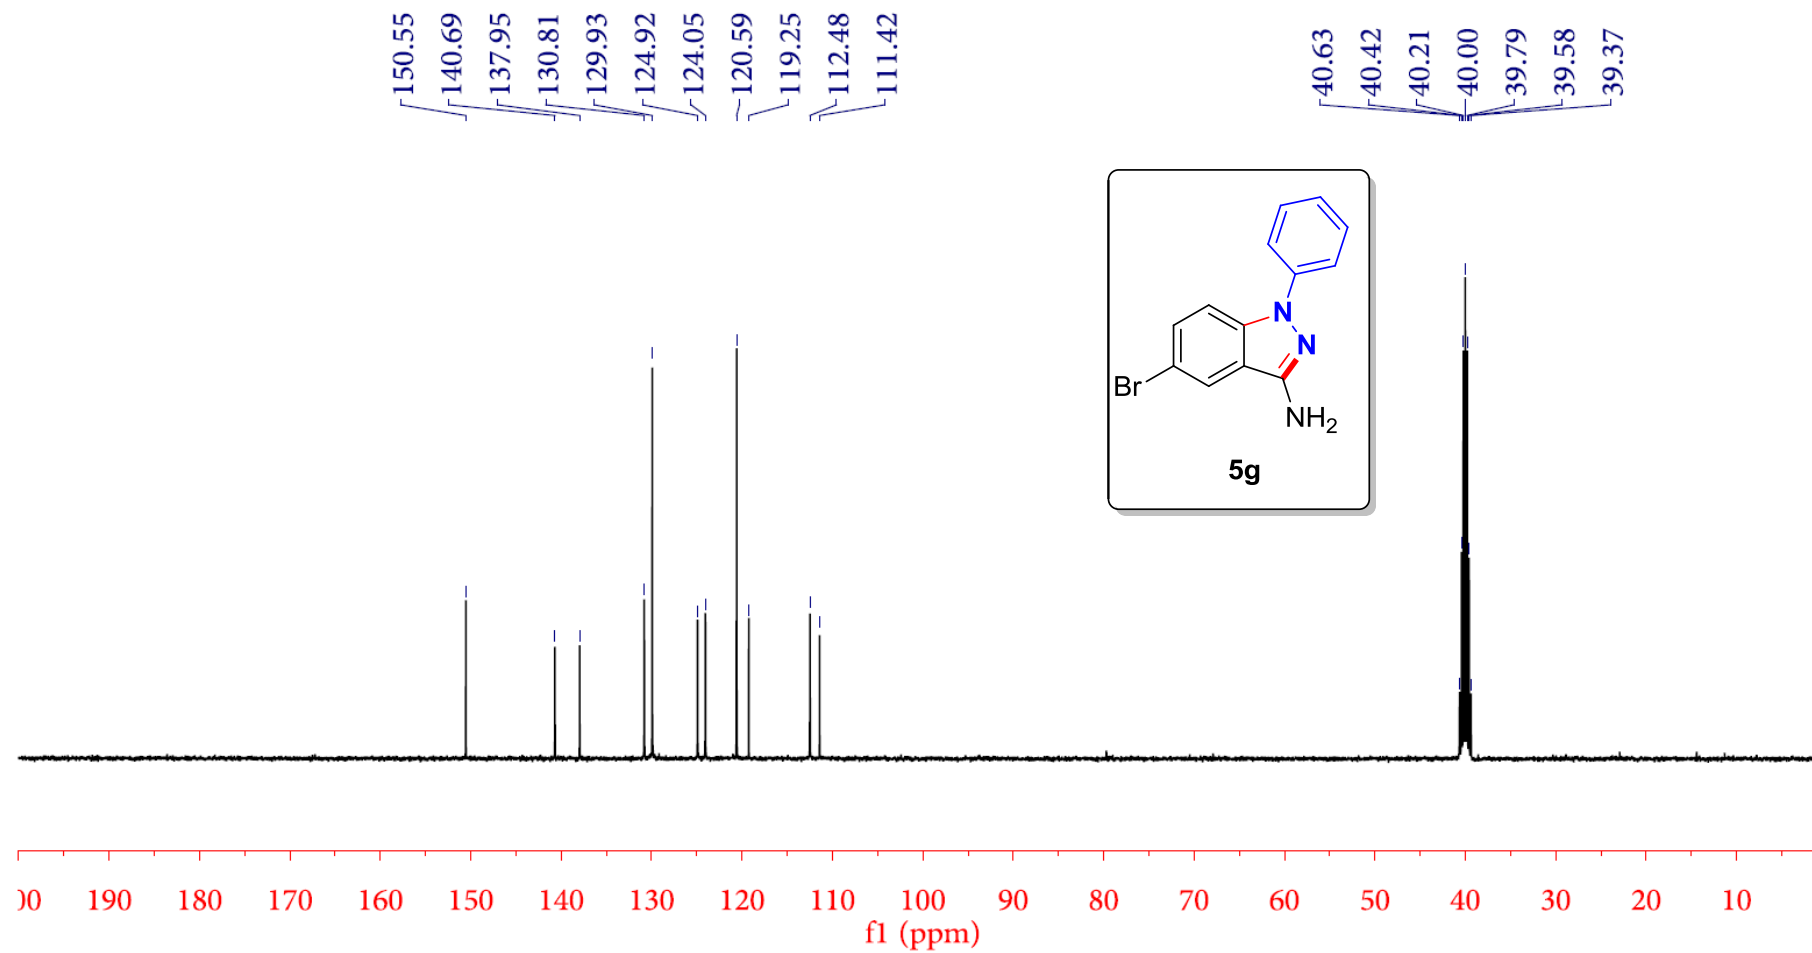

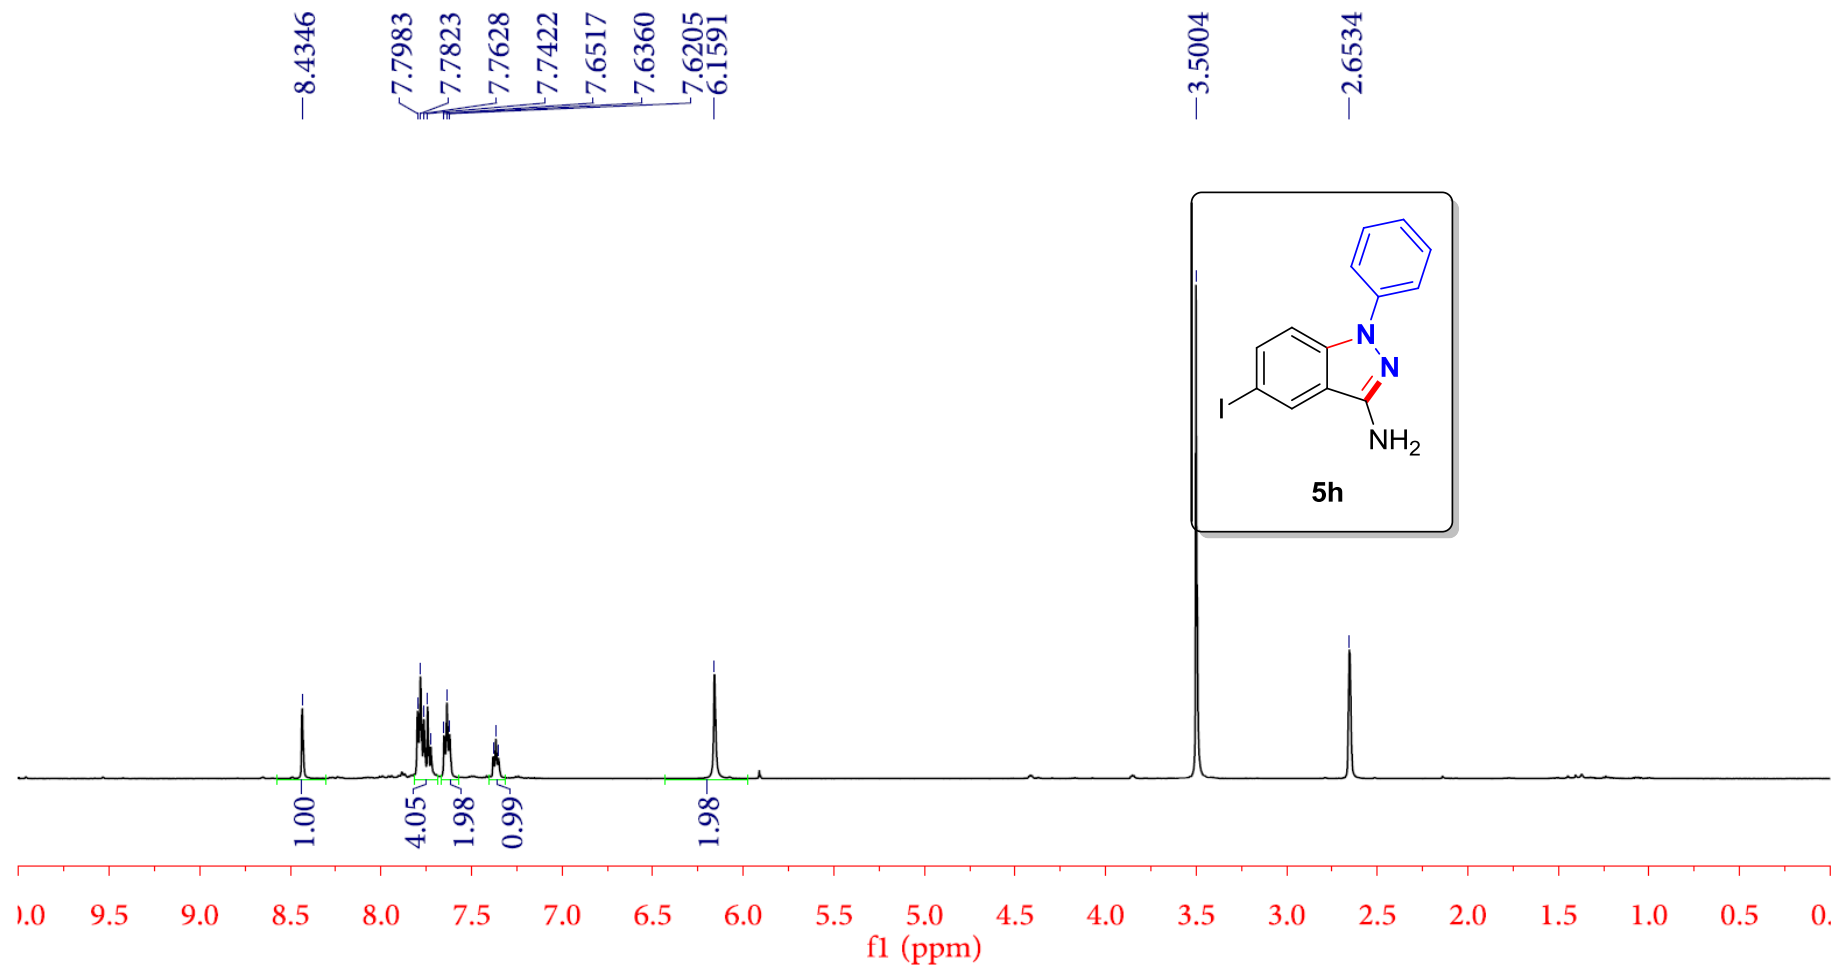

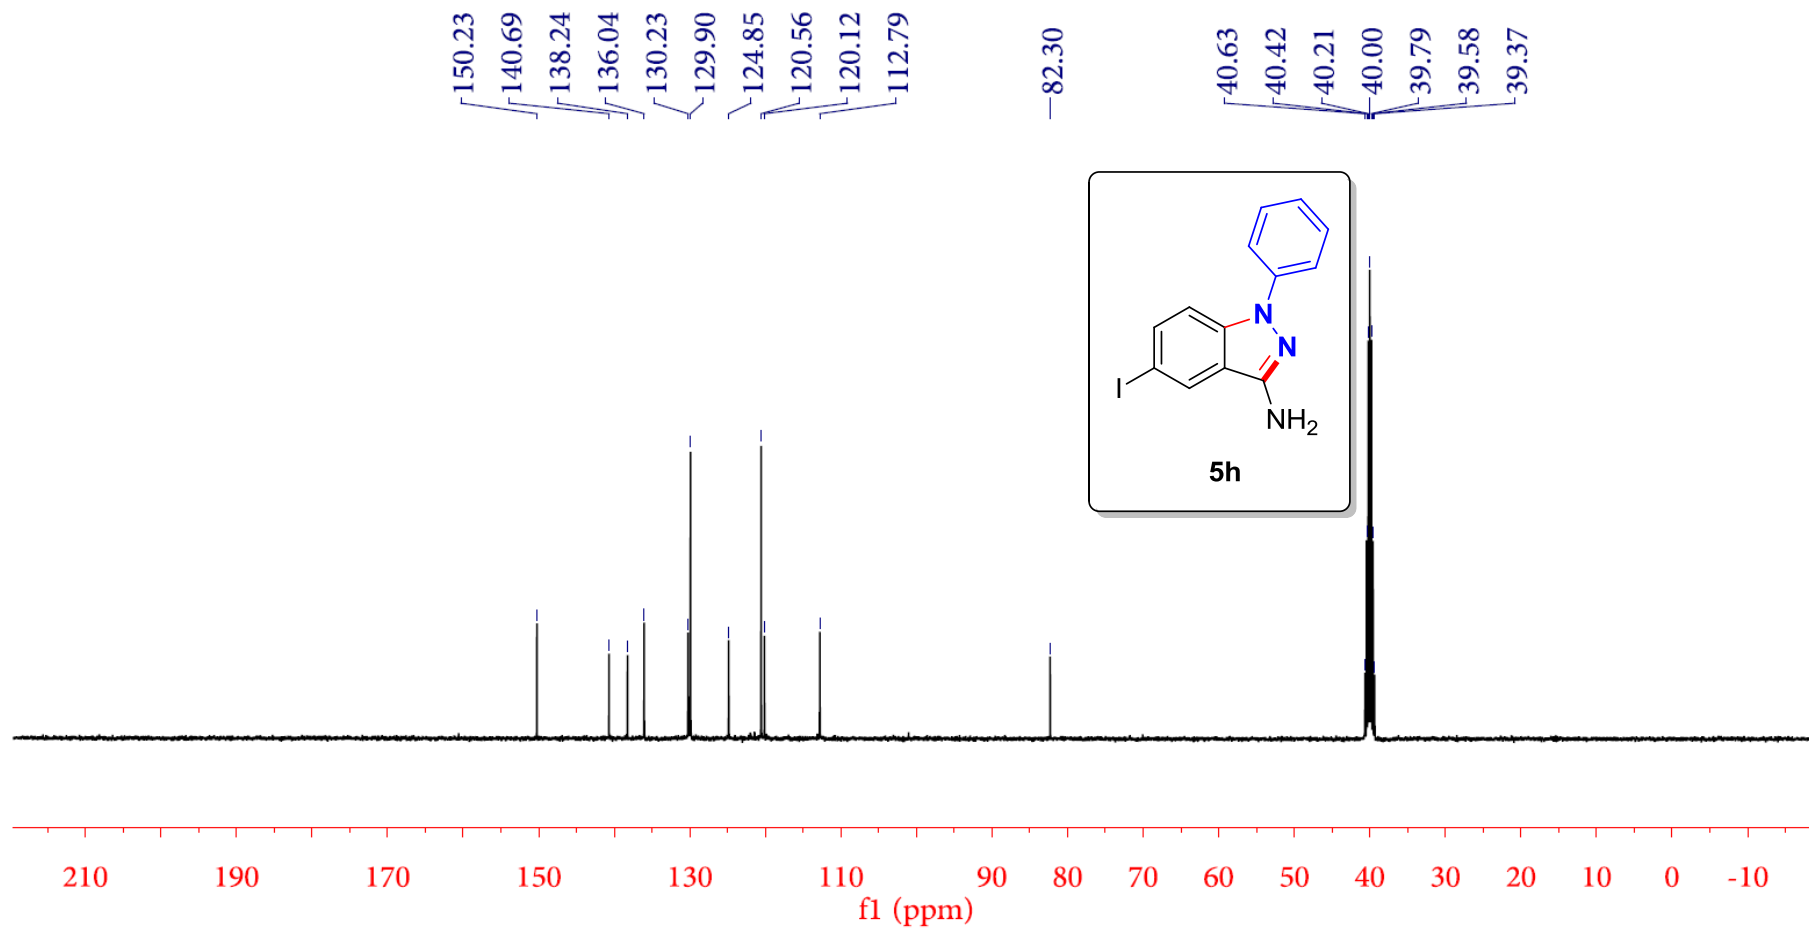

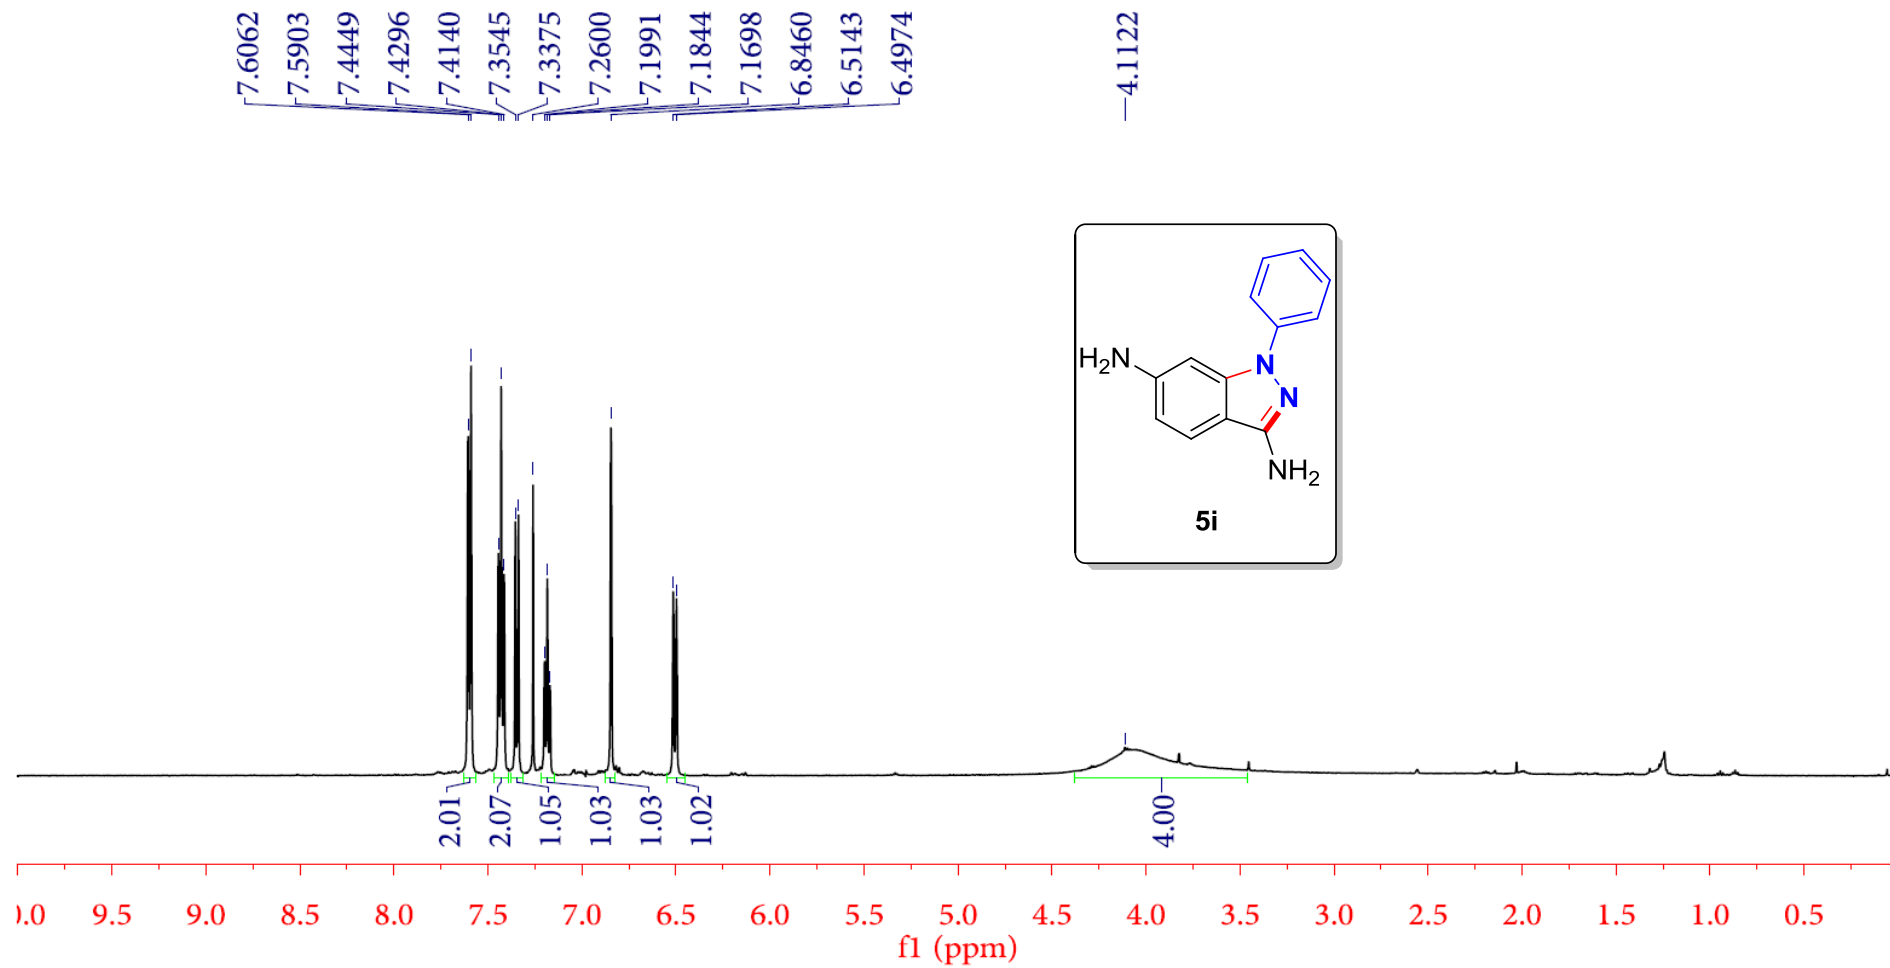

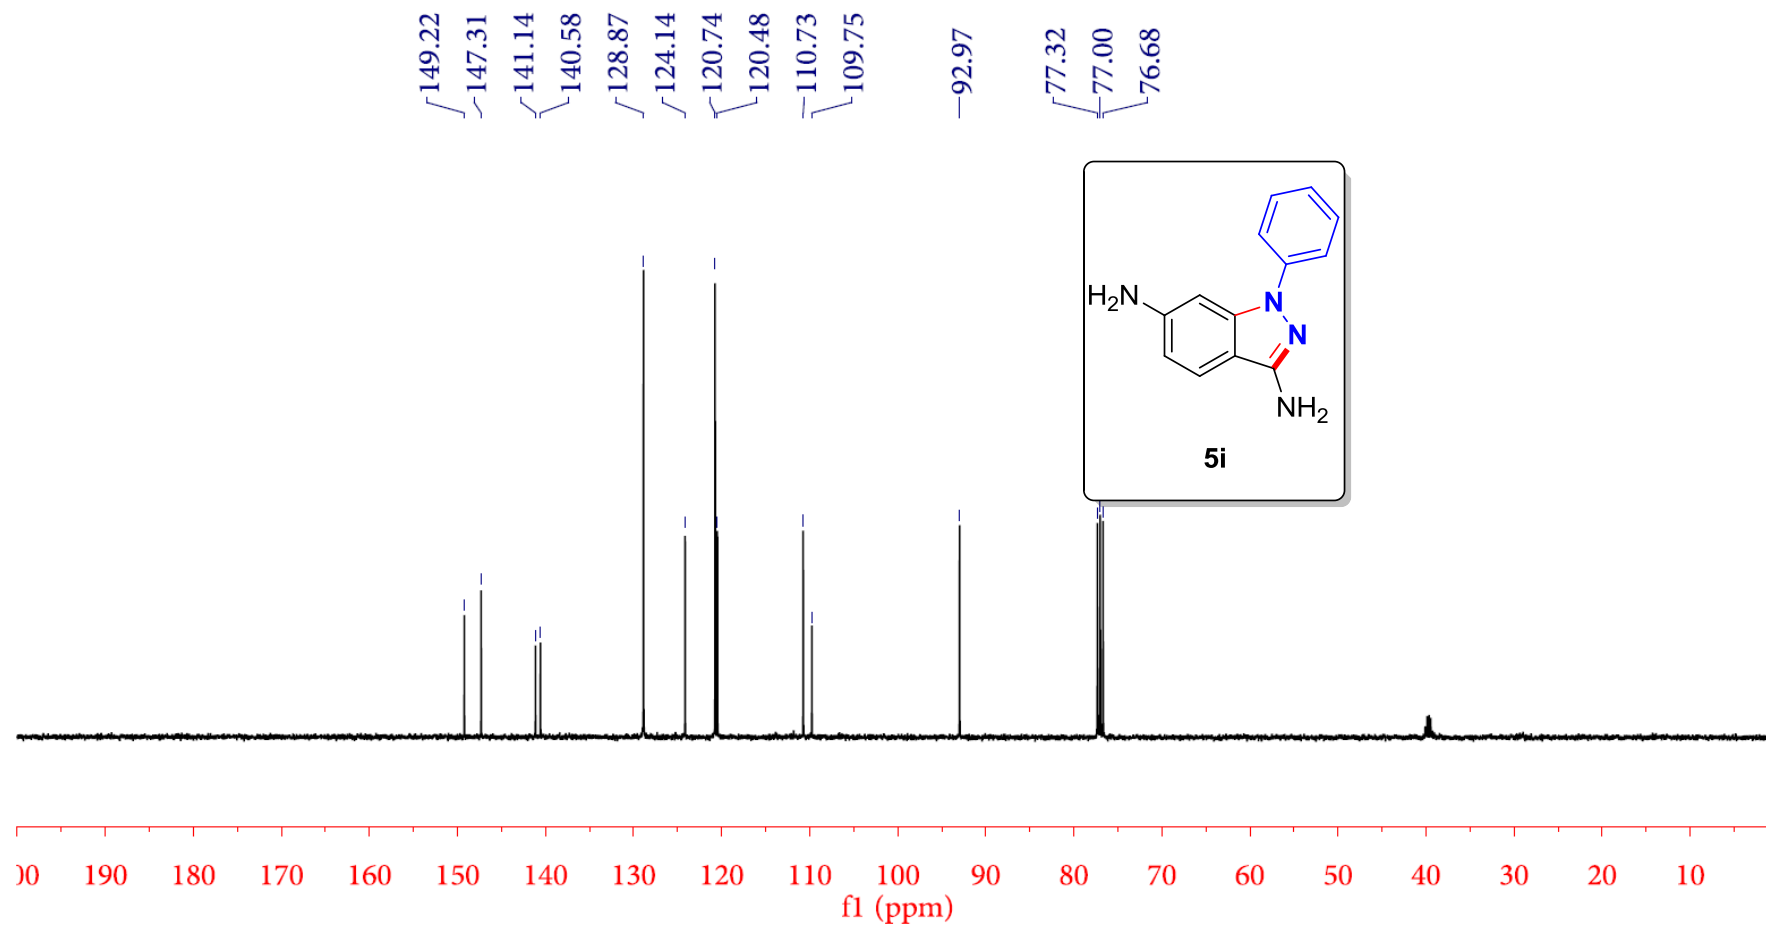

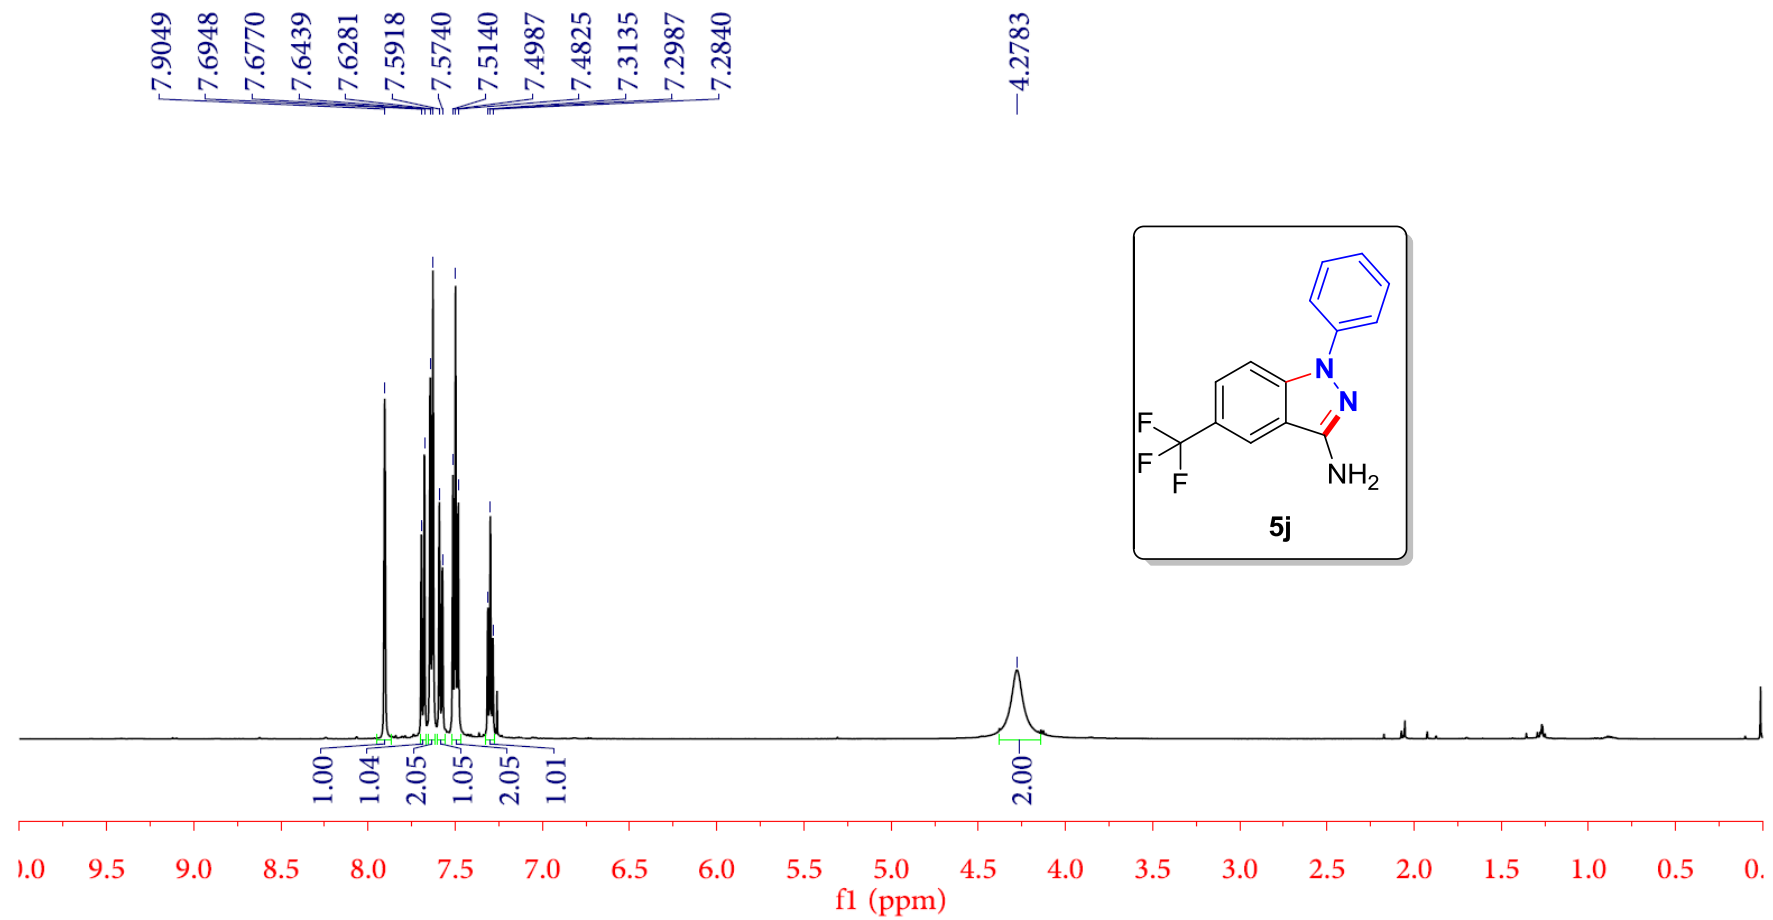

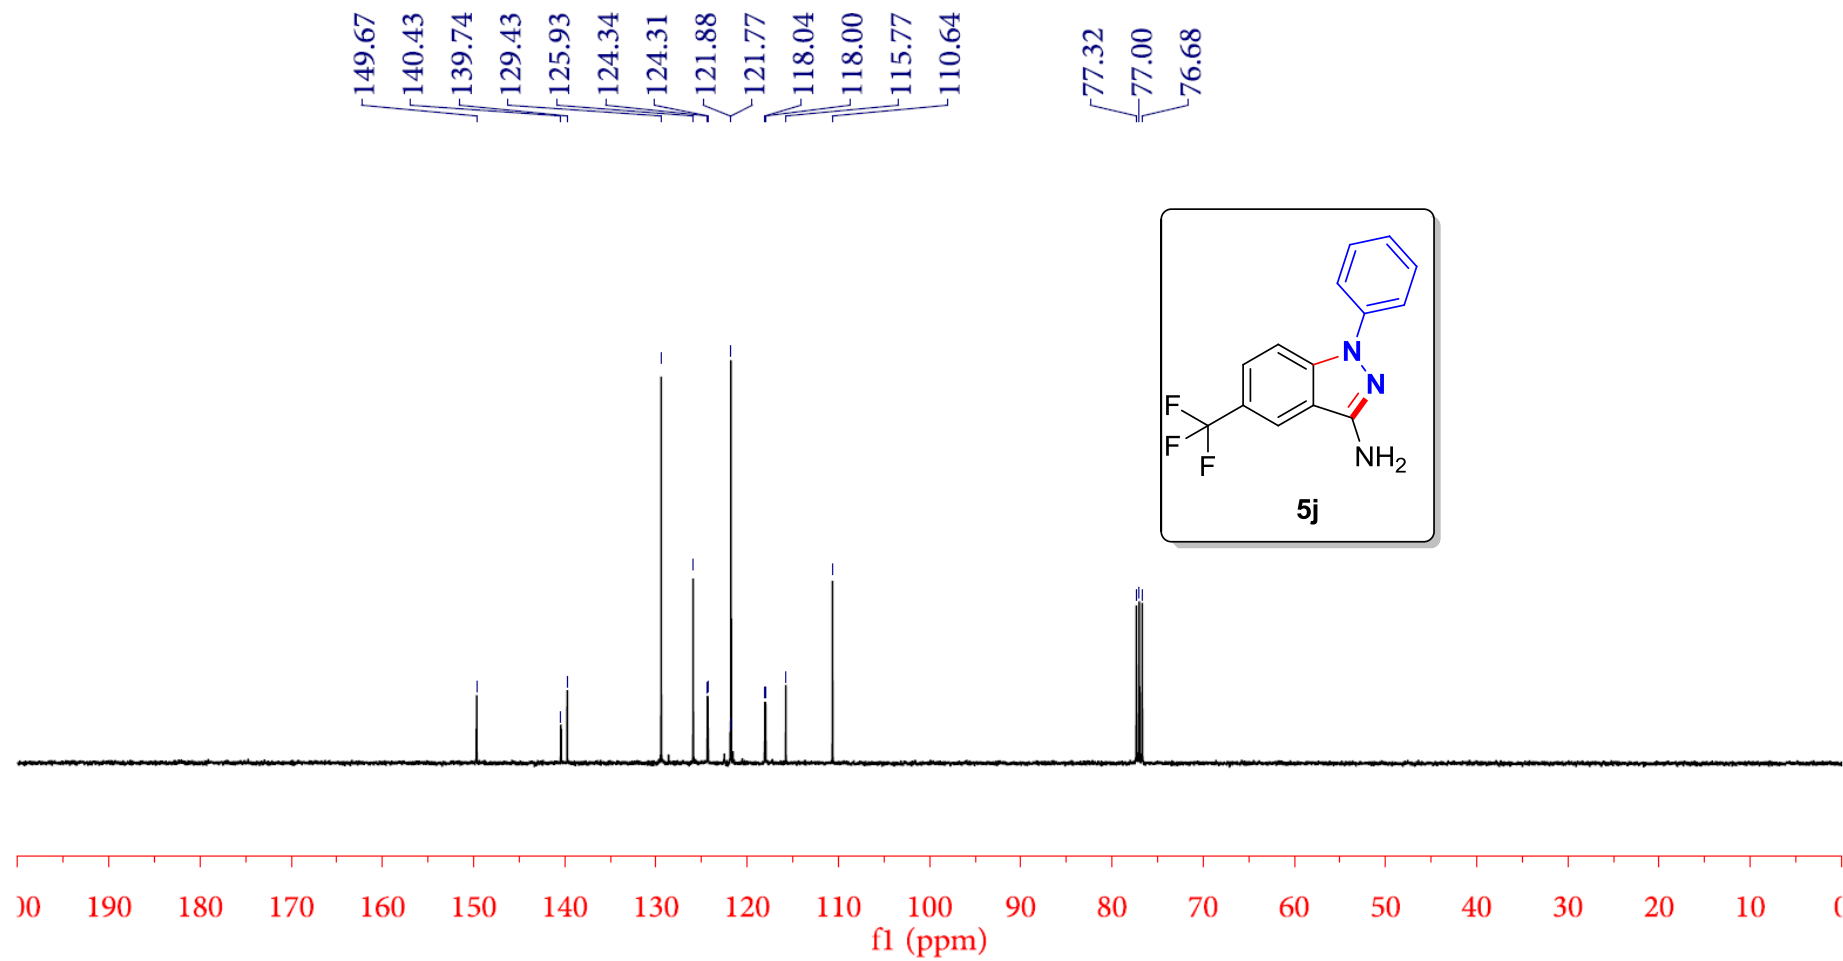



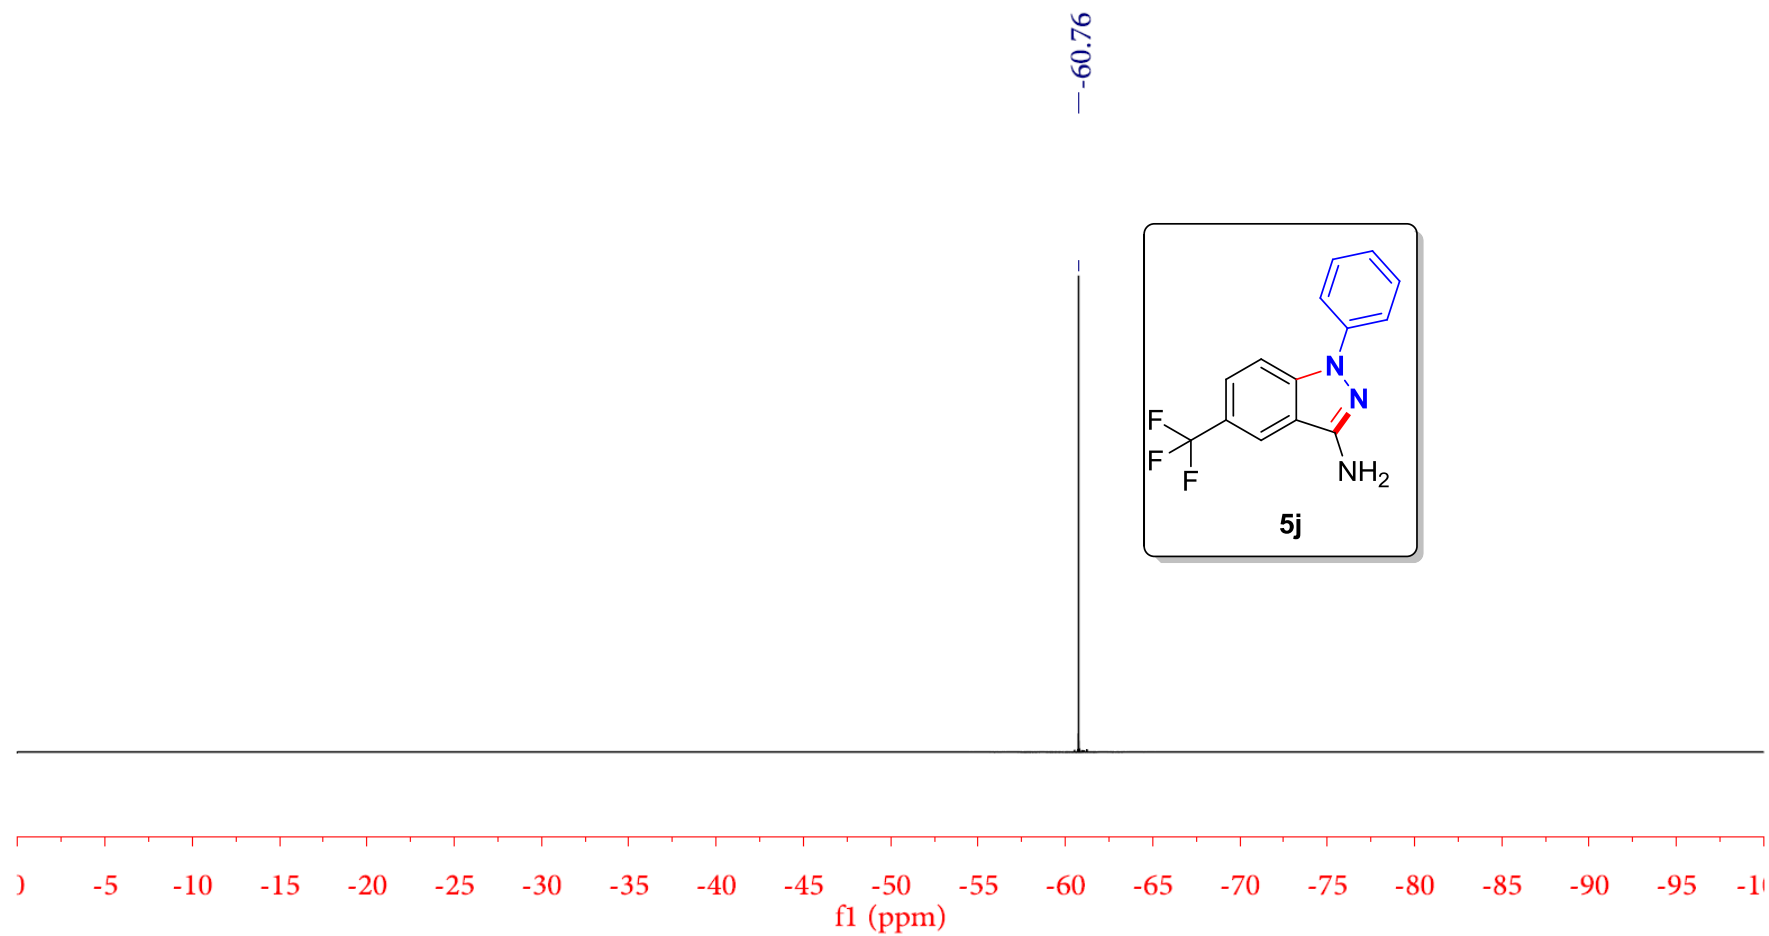

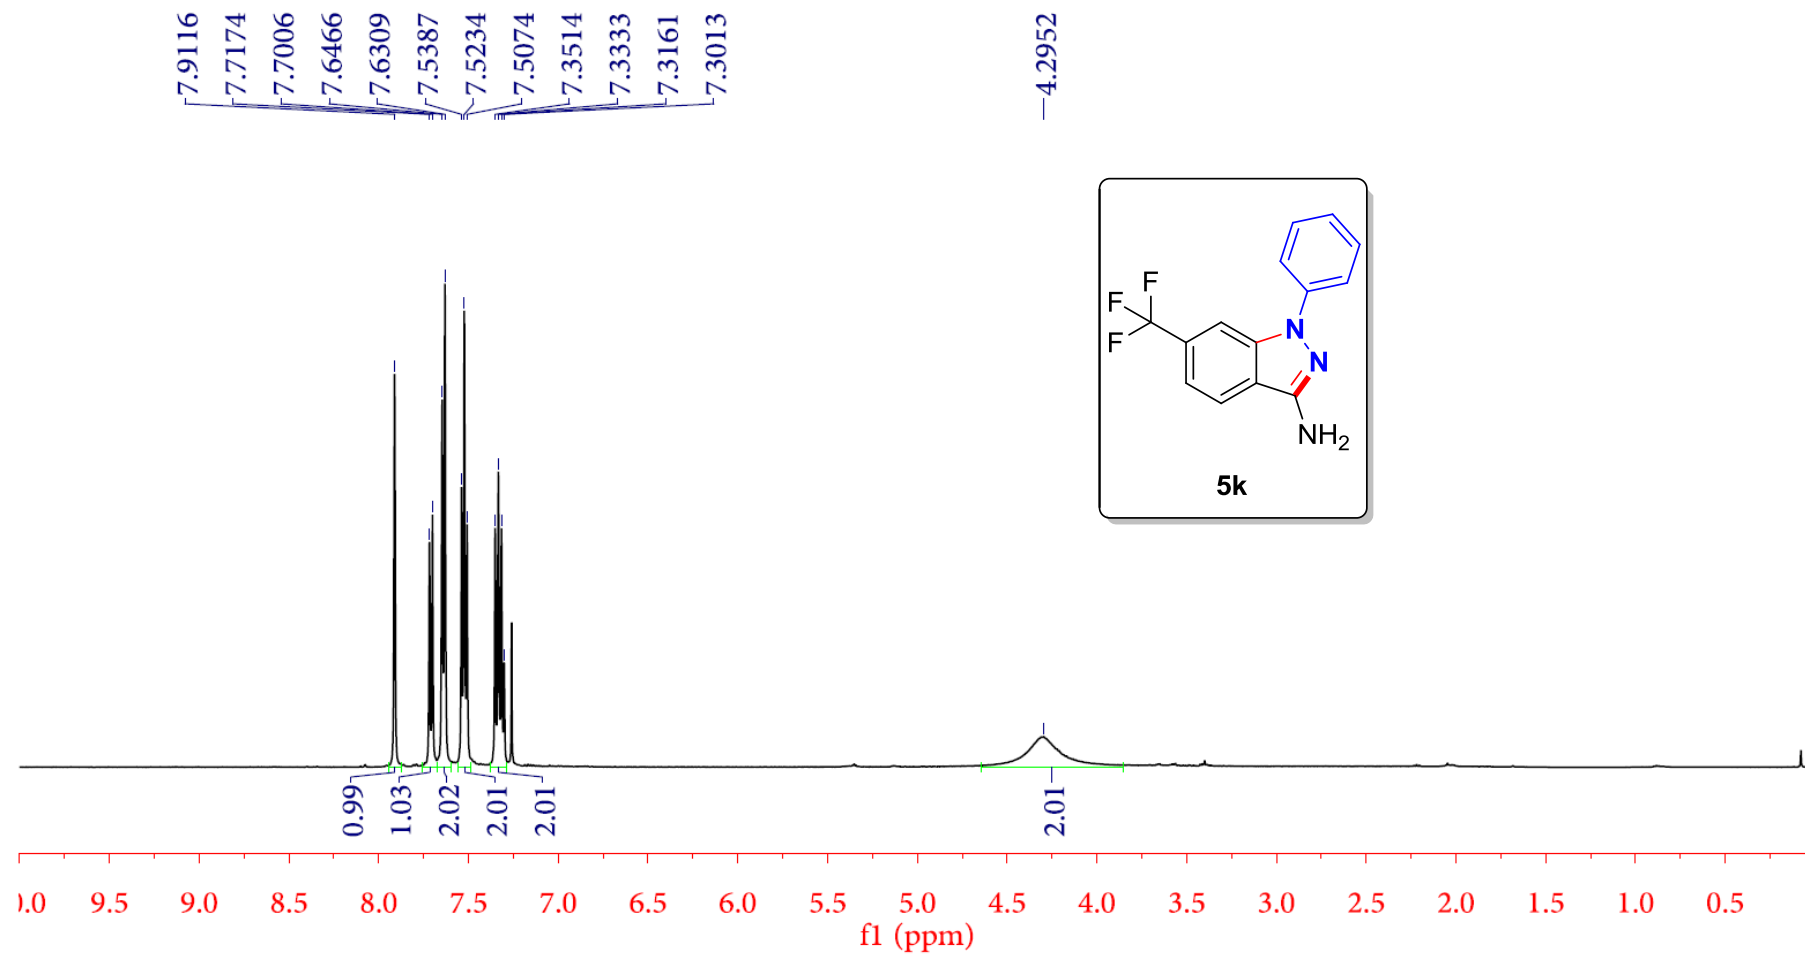

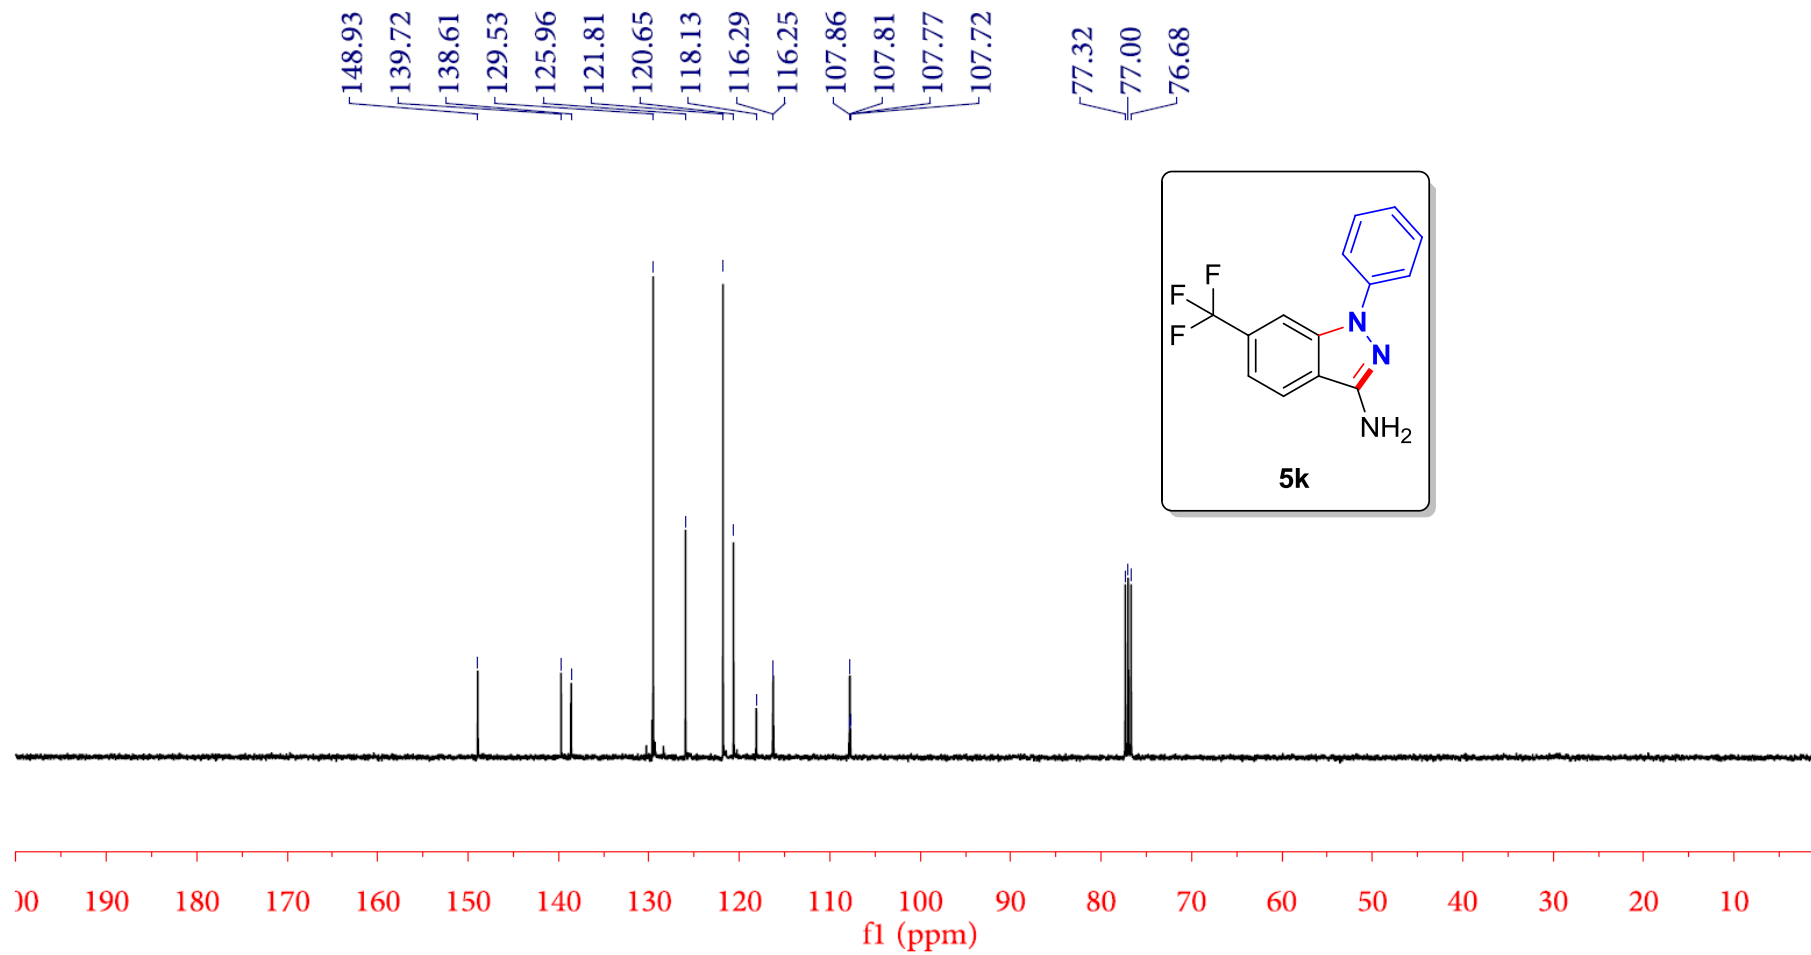

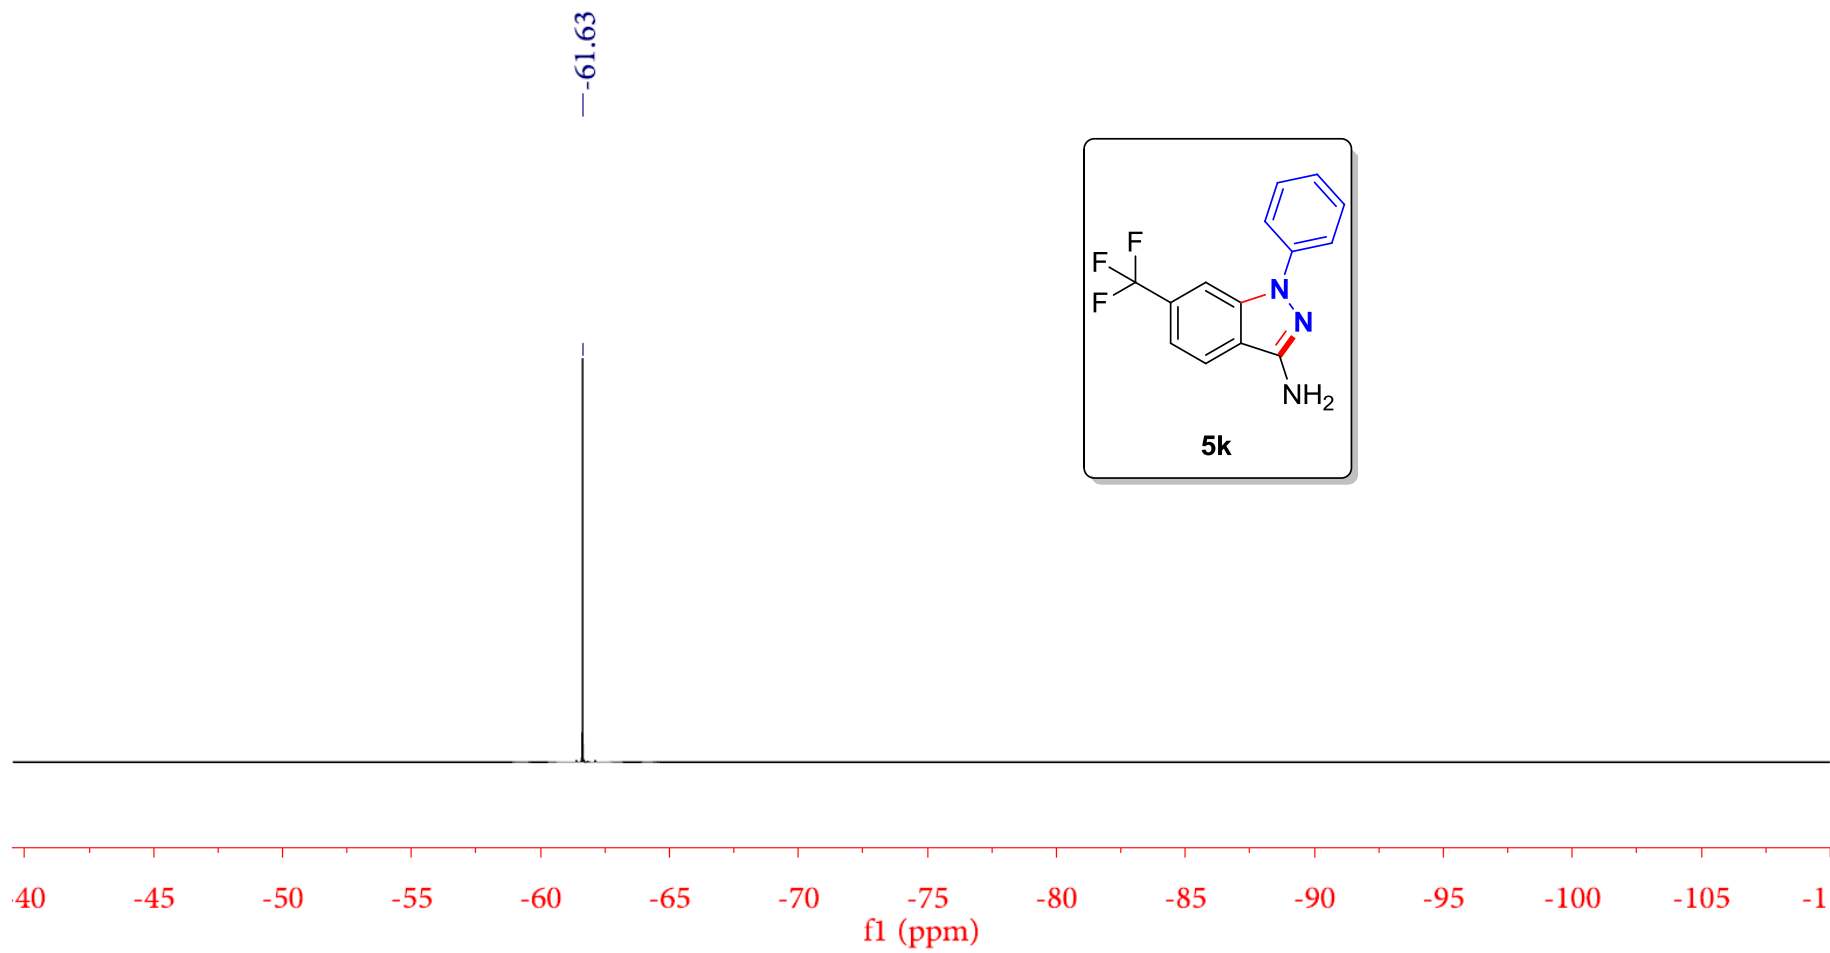

Supplement: d0cc03789c1.pdf [file d0cc03789c1.pdf]
